# Supplementary material
Source: publisher figshare collection journal article supplement (https://acs.figshare.com/ndownloader/files/20081747)
Supplement: Supplementary file 1 [file 20081747]

# Supporting Information for

## Isolation and Study of Ruthenium–Cobalt Oxo Cubanes Bearing a High-Valent, Terminal Ru<sup>V</sup>–Oxo with Significant Oxyl Radical Character

Jaruwan Amtawong<sup>†</sup>, David Balcells<sup>‡</sup>, Jarett Wilcoxon<sup>§</sup>, Rex C. Handford<sup>†</sup>, Naomi Biggins<sup>†</sup>, Andy I. Nguyen<sup>†,||</sup>, R. David Britt<sup>§</sup>, T. Don Tilley<sup>\*,†,||</sup>

<sup>†</sup>Department of Chemistry, University of California at Berkeley, Berkeley, California 94720-1460, United States

<sup>‡</sup>Hylleraas Centre for Quantum Molecular Sciences, Department of Chemistry, University of Oslo, P.O. Box 1033, Blindern, 0315 Oslo, Norway

<sup>§</sup>Department of Chemistry, University of California, Davis, California 95616, United States

<sup>||</sup>Chemical Sciences Division, Lawrence Berkeley National Laboratory, Berkeley, California 94720, United States

---

### Table of Contents

|                                      |     |
|--------------------------------------|-----|
| General Considerations.....          | S2  |
| Analytical Methods.....              | S2  |
| NMR Spectroscopy .....               | S2  |
| Infrared spectroscopy .....          | S2  |
| UV-Vis-NIR Spectroscopy .....        | S2  |
| Electrochemistry Experiments .....   | S2  |
| Synthesis and Characterization ..... | S3  |
| EPR Spectroscopy .....               | S6  |
| X-ray crystallography .....          | S7  |
| Computational Details .....          | S15 |
| Supplementary Figures .....          | S34 |
| References.....                      | S57 |

## General Considerations

All reactions and experiments, unless otherwise noted, were performed in a dry nitrogen or argon atmosphere. Cobalt(II) acetate tetrahydrate, pyridine, 4-methoxypyridine, 4-methylpyridine, 4-trifluoromethylpyridine, triphenylphosphine, cyclohexadiene, styrene, benzyl alcohol, isopropyl alcohol, 1,2-diphenylhydrazine, and hydrogen peroxide (30 % in H<sub>2</sub>O) were purchased from Sigma-Aldrich. These chemicals were used without further purification. Standard literature procedures were followed to prepare tetrapropylammonium perruthenate,<sup>1</sup> thianthrenium tetrafluoroborate,<sup>2</sup> 2,4,6-tri-*tert*-butylphenoxy radical,<sup>3</sup> and trityl radical.<sup>4</sup> Solvents were dried with a JC Meyers Phoenix SDS solvent purification system and stored over 3Å molecular sieves prior to use. Dichloromethane-*d*<sub>2</sub> (CD<sub>2</sub>Cl<sub>2</sub>) and chloroform-*d* (CDCl<sub>3</sub>) were degassed with three freeze-pump-thaw cycles and stored under nitrogen over 3Å molecular sieves. Acetonitrile-*d*<sub>3</sub> (CD<sub>3</sub>CN) was dried over CaH<sub>2</sub>, degassed with three freeze-pump-thaw cycles, and stored under nitrogen over 3Å molecular sieves. Water was obtained from a Millipore Milli-Q water purification system.

## Analytical Methods

Element analyses were performed at the Microanalytical Laboratory at the University of California, Berkeley (UC Berkeley) using a Perkin Elmer 2400 Series II combustion analyzer equipped for determination of %C, %H, and %N. High-resolution electrospray ionization mass spectrometry (HR-ESI-MS) measurements were performed at the Catalysis Center at UC Berkeley. Gas production was measured on an SRI-GC instrument equipped with 6' Hayesep D and 5Å molecular sieve chromatographic columns. Two in-line detectors were used: a TCD for H<sub>2</sub>, O<sub>2</sub>, and N<sub>2</sub> detection, and a FID equipped with a methanizer for CO, CO<sub>2</sub>, and hydrocarbon detection.

## NMR Spectroscopy

All <sup>1</sup>H, <sup>19</sup>F, and <sup>31</sup>P NMR experiments were carried out at the UC Berkeley College of Chemistry NMR facility using Bruker AV-700, AV-600, AV500, AVQ-400, and AVB-400 spectrometers at ambient temperature. <sup>19</sup>F NMR spectra were internally referenced to CCl<sub>3</sub>F. Solution magnetic susceptibilities were determined by <sup>1</sup>H NMR spectroscopy using Evans' method.<sup>5</sup> The shift in chemical shift was measured for dissolved *tetrakis*(trimethylsilyl)silane.

## Infrared spectroscopy

Measurements were performed at the UC Berkeley Catalysis center using an A225/Q Platinum ATR accessory with a Bruker Vertex 80 FTIR Spectrometer. The instrument is equipped with a room temperature DLaTGS detector. Spectra were analyzed by the OPUS software (v. 7.2).

## UV-Vis-NIR Spectroscopy

UV-Visible-NIR spectrum of compound **1a** was obtained on a Varian Cary 5000 using Cary WinUV software (v. 3.00(339)).

## Electrochemistry Experiments

Electrochemical experiments were performed at ambient temperature in a dry nitrogen-filled glovebox using a BASi EC Epsilon potentiostat/galvanostat and a PWR-3 Power Module. A 3 mm diameter glassy carbon electrode was used as the working electrode. The electrode was polished with 0.30 μm alumina slurries, followed by additional 0.05 μm alumina slurries, rinsed with water, and dried *in vacuo* before use. Platinum wire and a Ag/AgNO<sub>3</sub> reference electrode (0.1 M [<sup>n</sup>Bu<sub>4</sub>N][PF<sub>6</sub>] in acetonitrile) were used as the counter electrode and reference electrode, respectively. Tetrabutylammonium hexafluorophosphate, electrochemical grade, (0.1 M in *ortho*-difluorobenzene) served as the electrolyte. Ferrocene was added at the end of each experiment and the half-potential of [Cp<sub>2</sub>Fc]<sup>0/+</sup>

redox couple served as the internal standard to compare with the recorded potentials. *iR* compensation was carried out for each measurement to correct the solution resistance. Concentrations of analyte were 1.0 mM for all experiments. The  $E^\circ$  values for the oxidation events reported are the midpoints of the anodic ( $E_{pa}$ ) and cathodic ( $E_{pc}$ ) peak potentials, calculated as  $E^\circ = (E_{pa} + E_{pc})/2$ . The reversibility of the redox events was determined by the peak-to-peak separations ( $\Delta E_p = E_{pa} - E_{pc}$ ) and the ratio of the cathodic peak current to the anodic peak current at multiple scan rates. The peak currents were determined by EC Lab software. For irreversible reduction events,  $E^\circ$  values were determined using differential pulse voltammetry.

## Synthesis and Characterization

### **Ru(O)Co<sub>3</sub>( $\mu_3$ -O)<sub>4</sub>(OAc)<sub>4</sub>(py)<sub>3</sub> (**1a**):**

Pyridine (1.7 mL, 21 mmol) was added to a suspension of cobalt(II) acetate tetrahydrate (5.3 g, 21 mmol) in acetonitrile (250 mL). The mixture was stirred vigorously until the solid was partially dissolved, forming a purple solution. Tetrapropylammonium perruthenate (5.0 g, 14 mmol) was then added, and a color change from purple to dark brown was observed. The resulting solution was stirred for 16 h at room temperature to give a dark brown solution and black solid. The solid was collected by vacuum filtration and washed with acetonitrile (100 mL) followed by diethyl ether (50 mL). Dichloromethane (50 mL) was added to dissolve the solid. The solution containing **1a** was separated from an insoluble black solid by vacuum filtration. TLC analysis of the filtrate shows two spots with  $R_f$  values of 0.3 and 0 (acetone: dichloromethane; 20:80). The resulting mixture was purified by a wet loaded silica plug (eluting with acetone: dichloromethane; 20:80). Product containing fractions ( $R_f = 0.3$ ) were combined and concentrated to afford a dark brown solid. X-ray quality crystals of **1a** were obtained by diffusion of *n*-hexane into a saturated dichloromethane solution at room temperature (2.7 g, 45% based on cobalt acetate). <sup>1</sup>H NMR spectrum shows somewhat broad and integrable resonances;  $\mu_{eff} = 2.0 \mu_B$  (700.13 MHz, CD<sub>2</sub>Cl<sub>2</sub>, 22 °C, Evans' method). <sup>1</sup>H NMR (700.13 MHz, CD<sub>2</sub>Cl<sub>2</sub>):  $\delta$  10.61 (br s, 2H, py-H), 8.01 (s, 1H, py-H), 7.39 (d, 2H, py-H), 7.12 (t, 2H, py-H), 6.88 (d, 4H, py-H), 6.67 (s, 4H, py-H), 2.65 (s, 6H, OAc-H), 2.62 (s, 6H, OAc-H). IR (ATR, dichloromethane,  $\nu(\text{cm}^{-1})$ ): 1608 (w, br), 1531 (s), 1485 (w), 1450 (m), 1416 (s), 1347 (m), 1214 (m), 1071 (m), 853 (s,  $\nu_{Ru-O}$ ), 730 (s), 689 (vs), 652 (s), 629 (s), 594 (w), 569 (m), 539 (m). Anal. Calcd for C<sub>23</sub>H<sub>27</sub>Co<sub>3</sub>N<sub>3</sub>O<sub>13</sub>Ru: C, 33.23; H, 3.27; N, 5.05. Found: C, 33.14; H, 3.57; N, 4.78. HR-MS (ESI): Calcd. for [RuCo<sub>3</sub>O<sub>5</sub>(CH<sub>3</sub>OO)<sub>4</sub>(C<sub>5</sub>H<sub>5</sub>N)<sub>3</sub>]<sup>+</sup>H<sup>+</sup>:  $m/z = 832.8661$ . Found:  $m/z = 832.8653$ .

### **Ru(O)Co<sub>3</sub>( $\mu_3$ -O)<sub>4</sub>(OAc)<sub>4</sub>(4-CF<sub>3</sub>-py)<sub>3</sub> (**1b**):**

To a suspension of cobalt(II) acetate tetrahydrate (1.0 g, 4.0 mmol) in acetonitrile (100 mL), 4-trifluoromethylpyridine (0.5 mL, 4.3 mmol) was added. With rapid stirring, tetrapropylammonium perruthenate (0.94 g, 2.7 mmol) was introduced, and the resulting mixture was stirred at room temperature for 16 h to give a dark brown solution and black solid. The solid was collected by vacuum filtration and washed quickly with acetonitrile (30 mL). TLC analysis (acetone: dichloromethane; 20:80) of the solid shows two major spots with  $R_f$  values of 0.5 and 0. Dichloromethane (20 mL) was added to dissolve the solid, and the resulting solution is carefully poured onto a silica plug (eluting with acetone: dichloromethane; 20:80). Product containing fractions ( $R_f = 0.5$ ) are combined and concentrated to afford a dark brown solid. Layering hexanes over a dichloromethane solution of the product at -30 °C afforded X-ray quality crystals of **1b** (0.5 g, 36 % based on cobalt acetate). Magnetic moment (600.13 MHz, CD<sub>2</sub>Cl<sub>2</sub>, 22 °C, Evans' method):  $2.3 \mu_B$ . <sup>1</sup>H NMR (600.13 MHz, CD<sub>2</sub>Cl<sub>2</sub>):  $\delta$  10.82 (br s, 2H, py-H), 7.68 (s, 2H, py-H), 7.13 (s, 4H, py-H), 6.98 (br s, 4H, py-H), 2.69 (s, 6H, OAc-H), 2.67 (s, 6H, OAc-H). IR (ATR, dichloromethane,  $\nu(\text{cm}^{-1})$ ): 1529 (s, br), 1422 (s), 1348 (w), 1325 (vs,  $\nu_{CF_3}$ ), 1185 (s,  $\nu_{CF_3}$ ), 1144 (s,  $\nu_{CF_3}$ ), 1104 (w), 1087 (s), 1063 (s), 1036 (w), 857 (s,  $\nu_{Ru-O}$ ), 838 (s,  $\nu_{CF_3}$ ), 738 (s), 692 (m), 680 (s), 652 (m), 630 (s), 604 (vw), 568 (m), 541 (m). Anal. Calcd for C<sub>26</sub>H<sub>24</sub>Co<sub>3</sub>F<sub>9</sub>N<sub>3</sub>O<sub>13</sub>Ru: C, 30.16; H, 2.34; N, 4.06. Found: C,

29.71; H, 2.41; N, 3.77. HR-MS (ESI): Calcd. for  $[\text{RuCo}_3\text{O}_5(\text{CH}_3\text{OO})_4(\text{C}_6\text{H}_4\text{F}_3\text{N})_3]\cdot\text{H}^+$ :  $m/z = 1036.8283$ . Found:  $m/z = 1036.8181$ .

**$\text{Ru}(\text{O})\text{Co}_3(\mu_3\text{-O})_4(\text{OAc})_4(4\text{-Me-py})_3$  (**1c**):**

To a suspension of cobalt(II) acetate tetrahydrate (0.2 g, 0.8 mmol) in acetonitrile (10 mL), 4-methylpyridine (0.078 mL, 0.8 mmol) was added. The resulting mixture was stirred vigorously while tetrapropylammonium perruthenate (0.19 g, 0.54 mmol) was added. The solution mixture was stirred for 16 h at room temperature to give a dark brown solution, which was subsequently concentrated *in vacuo* to yield a dark brown solid. TLC analysis (acetone: dichloromethane; 20:80) of the solid reveals two spots with  $R_f$  values of 0.5 and 0. The solid was dissolved in dichloromethane (5.0 mL) and purified by a wet loaded silica plug (eluting with acetone: dichloromethane; 20:80). The product was then crystallized with dichloromethane layered with hexanes at  $-30^\circ\text{C}$  to afford black crystals of **1c** (0.070 g, 30% based on cobalt acetate). Magnetic moment (600.13 MHz,  $\text{CD}_2\text{Cl}_2$ ,  $22^\circ\text{C}$ , Evans' method):  $2.3 \mu_B$ .  $^1\text{H}$  NMR (600.13 MHz,  $\text{CD}_2\text{Cl}_2$ ):  $\delta$  10.34 (br s, 2H, py-H), 7.23 (s, 2H, py-H), 6.72 (s, 4H, py-H), 6.46 (br s, 4H, py-H), 2.63 (s, 6H, OAc-H), 2.61 (br s, 6H, OAc-H), 2.30 (s, 3H, py-Me), 1.92 (s, 6H, py-Me). IR (ATR, dichloromethane,  $\nu(\text{cm}^{-1})$ ): 1621 (s), 1576 (s, br), 1559 (s, br), 1541 (s, br), 1504 (s, br), 1415 (vs), 1347 (m), 1253 (w), 1227 (w), 1209 (m), 1070 (w), 1042 (w, br), 1025 (w, br), 853 (s,  $\nu_{\text{Ru-O}}$ ), 811 (s,  $\nu_{\text{py-CH}_3}$ ), 745 (s), 724 (s), 697 (vs), 653 (m), 629 (vs), 592 (w), 570 (s), 535 (s), 496 (m). Anal. Calcd for  $\text{C}_{26}\text{H}_{33}\text{Co}_3\text{N}_3\text{O}_{13}\text{Ru}\cdot 0.3\text{CH}_2\text{Cl}_2$ : C, 35.14; H, 3.77; N, 4.67. Found: C, 35.03; H, 4.14; N, 4.59. HR-MS (ESI): Calcd. for  $[\text{RuCo}_3\text{O}_5(\text{CH}_3\text{OO})_4(\text{C}_6\text{H}_7\text{N})_3]\cdot\text{H}^+$ :  $m/z = 874.9131$ . Found:  $m/z = 874.9107$ .

**$\text{Ru}(\text{O})\text{Co}_3(\mu_3\text{-O})_4(\text{OAc})_4(4\text{-OMe-py})_3$  (**1d**):**

To a suspension of cobalt(II) acetate tetrahydrate (0.2 g, 0.8 mmol) in acetonitrile (10 mL), 4-methoxy pyridine (0.082 mL, 0.8 mmol) was added. Tetrapropylammonium perruthenate (0.19 g, 0.54 mmol) was then added, and the solution mixture was stirred at room temperature for 16 h to give a dark brown solution. Volatile components were removed *in vacuo*. TLC analysis (acetone: dichloromethane; 20:80) of the solid shows two main spots with  $R_f$  values of 0.25 and 0. Dichloromethane (5.0 mL) was added to dissolve the solid and the solution was purified by a silica plug (eluting with acetone: dichloromethane; 30:70). Product containing fractions were combined and concentrated *in vacuo*. Vapor diffusion of pentane into a dichloromethane solution of the product at  $-30^\circ\text{C}$  gave X-ray quality crystals of **1d** (0.094 g, 38% based on cobalt acetate). Magnetic moment (600.13 MHz  $\text{CD}_2\text{Cl}_2$ ,  $22^\circ\text{C}$ , Evans' method):  $2.2 \mu_B$ .  $^1\text{H}$  NMR (400.13 MHz,  $\text{CD}_2\text{Cl}_2$ ):  $\delta$  10.32 (br s, 2H, py-H), 6.93 (br s, 2H, py-H), 6.44 (br s, 8H, py-H), 3.76 (s, 3H, py-OMe), 3.55 (s, 6H, py-OMe), 2.64 (br s, 12H, OAc-H). IR (ATR, dichloromethane,  $\nu(\text{cm}^{-1})$ ): 1619 (vs), 1569 (m), 1509 (vs), 1462 (w), 1439 (s, br), 1416 (vs), 1347 (m), 1299 (vs), 1207 (vs), 1062 (s), 1038 (s), 1017 (s), 853 (s,  $\nu_{\text{Ru-O}}$ ), 837 (m,  $\nu_{\text{py-OCH}_3}$ ), 822 (s,  $\nu_{\text{py-OCH}_3}$ ), 653 (s), 629 (vs), 567 (s), 542 (s). Anal. Calcd for  $\text{C}_{26}\text{H}_{33}\text{Co}_3\text{N}_3\text{O}_{16}\text{Ru}$ : C, 33.89; H, 3.61; N, 4.56. Found: C, 33.56; H, 3.83; N, 4.46. HR-MS (ESI): Calcd. for  $[\text{RuCo}_3\text{O}_5(\text{CH}_3\text{OO})_4(\text{C}_6\text{H}_7\text{NO})_3]\cdot\text{H}^+$ :  $m/z = 922.8961$ . Found:  $m/z = 922.8978$ .

**$[\text{Ru}(\text{MeCN})\text{Co}_3(\mu_3\text{-O})_4(\text{OAc})_4(4\text{-OMe-py})_3][\text{BF}_4]$  (**2-MeCN**)**

In a nitrogen-filled glovebox, compound **1d** (0.050 g, 0.054 mmol) was dissolved in acetonitrile (3 mL), and then thianthrenium tetrafluoroborate (0.018 g, 0.059 mmol) was added. The reaction mixture was stirred for 10 min at room temperature to give a dark brown solution, which was filtered through a glass wool plug. Layering diethyl ether over the filtrate at  $-30^\circ\text{C}$  afforded dark green powder. The supernatant was carefully decanted, and the resulting powder was rinsed with additional diethyl ether (5 mL), which was then removed and combined with the supernatant. The combined solution was concentrated *in vacuo* to yield thianthrene oxide (0.012 g, 90%), which was pure by  $^1\text{H}$  NMR spectroscopy. Residual volatile components were removed from the green solid *in vacuo* to give **2-MeCN** (0.051 g, 92%). X-ray quality crystals of **2-MeCN** were obtained by vapor diffusion of diethyl ether into an acetonitrile solution of the product at  $-30^\circ\text{C}$ . Magnetic moment (500.23 MHz,  $\text{CD}_2\text{Cl}_2$ ,  $22^\circ\text{C}$ , Evans' method):  $2.8 \mu_B$ .  $^1\text{H}$  NMR

(500.23 MHz, CD<sub>2</sub>Cl<sub>2</sub>):  $\delta$  27.28 (s), 22.15 (s), 17.52 (s), 15.03 (s), 12.06 (br s), 9.32 (s), 5.35 (s), 1.29 (s). <sup>19</sup>F NMR (376 MHz, CD<sub>3</sub>CN):  $\delta$  -151 (BF<sub>4</sub>). IR (ATR, dichloromethane,  $\nu$ (cm<sup>-1</sup>)): 1619 (vs), 1569 (m), 1509 (vs), 1462 (w), 1439 (s, br), 1416 (vs), 1347 (m), 1299 (vs), 1207 (vs), 1098 (s, br,  $\nu_{\text{BF}_4}$ ), 1062 (s), 1038 (s), 1017 (s), 837 (m,  $\nu_{\text{py-OCH}_3}$ ), 822 (s,  $\nu_{\text{py-OCH}_3}$ ), 653 (s), 629 (vs), 567 (s), 542 (s). Anal. Calcd for C<sub>28</sub>H<sub>36</sub>BCo<sub>3</sub>F<sub>4</sub>N<sub>4</sub>O<sub>15</sub>Ru·0.5CH<sub>3</sub>CN: C, 33.05; H, 3.59; N, 5.98. Found: C, 33.41; H, 3.40; N, 5.52. HR-MS (ESI): Calcd. for [Ru(CH<sub>3</sub>CN)Co<sub>3</sub>O<sub>4</sub>(CH<sub>3</sub>OO)<sub>4</sub>(C<sub>6</sub>H<sub>7</sub>NO)<sub>3</sub>]<sup>+</sup>:  $m/z$  = 946.9216. Found:  $m/z$  = 946.9301.

**Ru(OC<sub>18</sub>H<sub>29</sub>O)Co<sub>3</sub>( $\mu_3$ -O)<sub>4</sub>(OAc)<sub>4</sub>(py)<sub>3</sub> (3):**

In a nitrogen-filled glovebox, 2,4,6-tri-*tert*-butylphenoxyl radical (0.016 g, 0.061 mmol) in *ortho*-difluorobenzene (2 mL) was added dropwise to a solution of **1a** (0.05 g, 0.06 mmol) in *ortho*-difluorobenzene (3 mL) with vigorous stirring. The reaction mixture was stirred for 1 h at room temperature, and volatile materials were removed *in vacuo* to give a dark brown solid. Vapor diffusion of pentane into a chloroform solution of the product at -30 °C yielded X-ray quality, dark brown crystals of **3** (0.062 g, 95%). Magnetic moment (500.23 MHz, CD<sub>2</sub>Cl<sub>2</sub>, 22 °C, Evans' method): 3.6  $\mu_B$ . <sup>1</sup>H NMR (500.23 MHz, CD<sub>3</sub>CN):  $\delta$  16.06 (s, 6H, OAc-H), 13.51 (s, 2H, py-H), 6.39 (s, 2H, py-H), 5.96 (s, 6H, OAc-H), 4.33 (s, 2H, py-H), 4.16 (s, 4H, py-H), 2.88 (s, 18H, <sup>*t*</sup>Bu-H), -1.79 (s, 4H, py-H), -2.36 (s, 9H, <sup>*t*</sup>Bu-H), -22.63 (s, 2H, vinyl-H). IR (ATR, solid,  $\nu$ (cm<sup>-1</sup>)): 2951 (m, br,  $\nu_{\text{H}_2\text{C-H}}$ ), 2867 (m, br), 1654 (m), 1626 (s,  $\nu_{\text{C=O}}$ ), 1607 (m), 1525 (vs), 1484 (s), 1401 (vs), 1340 (s), 1264 (w), 1244 (m), 1211 (s), 1154 (m), 1105 (m), 1074 (m), 1048 (s), 1021 (w), 998 (s,  $\nu_{\text{C=C}}$ ), 968 (s,  $\nu_{\text{C=C}}$ ), 907 (m), 880 (m), 824 (m), 760 (s), 687 (vs), 626 (s), 565 (vs), 540 (s), 450 (m), 413 (w). Anal. Calcd for C<sub>41</sub>H<sub>56</sub>Co<sub>3</sub>N<sub>3</sub>O<sub>14</sub>Ru: C, 45.06; H, 5.17; N, 3.85. Found: C, 44.79; H, 5.25; N, 3.63. HR-MS (ESI): Calcd. for [Ru(OC<sub>18</sub>H<sub>29</sub>O)Co<sub>3</sub>O<sub>4</sub>(CH<sub>3</sub>OO)<sub>4</sub>(C<sub>6</sub>H<sub>7</sub>NO)<sub>3</sub>]<sup>+</sup>·H<sup>+</sup>:  $m/z$  = 1094.0879. Found:  $m/z$  = 1094.0963.

**Ru(OC<sub>19</sub>H<sub>15</sub>)Co<sub>3</sub>( $\mu_3$ -O)<sub>4</sub>(OAc)<sub>4</sub>(py)<sub>3</sub> (4):**

In a nitrogen-filled glovebox, a solution of Gomberg's dimer (0.088 g, 0.18 mmol) in *ortho*-difluorobenzene (2 mL) was added dropwise to a solution of **1a** (0.05 g, 0.06 mmol) in *ortho*-difluorobenzene (3 mL) with vigorous stirring. The mixture was stirred at room temperature for 1 h to give a dark brown solution, and the volatile components were removed *in vacuo*. Vapor diffusion of pentane into a chloroform solution of the product afforded X-ray quality crystals of **4** (0.06 g, 92%). Magnetic moment (500.23 MHz, CD<sub>2</sub>Cl<sub>2</sub>, 22 °C, Evans' method): 3.3  $\mu_B$ . <sup>1</sup>H NMR (600.13 MHz, CD<sub>2</sub>Cl<sub>2</sub>):  $\delta$  15.09 (s, 6H, OAc-H), 14.32 (s, 2H, py-H), 10.78 (s, 6H, phenyl-H), 7.82 (s, 3H, phenyl-H), 7.33 (s, 6H, phenyl-H), 6.43 (s, 2H, py-H), 6.14 (s, 6H, OAc-H), 5.78 (s, 1H, py-H), 4.31 (s, 2H, py-H), 4.16 (s, 4H, py-H), -1.39 (s, 4H, py-H). IR (ATR, solid,  $\nu$ (cm<sup>-1</sup>)): 1606 (m), 1523 (s, br), 1505 (s), 1484 (s), 1448 (s), 1403 (vs), 1341 (s), 1265 (m), 1244 (w, br), 1212 (s), 1188 (w, br), 1149 (m), 1101 (w), 1072 (m), 1044 (m, br), 1007 (vs, br), 993 (vs,  $\nu_{\text{C=C}}$ ), 937 (w), 917 (w), 896 (m), 840 (w), 781 (s), 757 (vs), 688 (vs), 662 (w), 626 (vs), 589 (w), 561 (vs), 542 (s, br), 528 (s, br), 486 (s), 451 (m). Anal. Calcd for C<sub>43</sub>H<sub>46</sub>Co<sub>3</sub>N<sub>3</sub>O<sub>13</sub>Ru: C, 47.35; H, 4.25; N, 3.85. Found: C, 47.52; H, 4.07; N, 3.69.

**[(py)<sub>3</sub>(OAc)<sub>4</sub>Co<sub>3</sub>( $\mu_3$ -O)<sub>4</sub>Ru]-O-[RuCo<sub>3</sub>( $\mu_3$ -O)<sub>4</sub>(OAc)<sub>4</sub>(py)<sub>3</sub>] (5):**

In a nitrogen-filled glovebox, compound **1a** (0.5 g, 0.60 mmol) was dissolved in dichloromethane (15 mL), and triphenylphosphine (0.079 mg, 0.30 mmol) was added. The solution was stirred for 30 min at room temperature to give a reddish-brown solution. The volatile materials were removed *in vacuo*. In air, the residue was washed with diethyl ether (3 x 10 mL) and dried *in vacuo* to yield a dark brown solid. Column chromatography of the mixture was performed to isolate the species using a silica gel column eluted with a gradient mixture of methanol and dichloromethane (3% to 6% methanol in dichloromethane). Product containing fractions ( $R_f$  = 0.2) were combined and volatile components were removed *in vacuo* to afford the title compound as a brown solid. Vapor diffusion of diisopropyl ether into a solution of 1,2-dichloroethane of the product at -30 °C gave X-ray quality, dark brown crystals of **5** (0.13 mg, 28%). Alternatively, **5** can be synthesized in air by dissolving compound **1a** (0.092 g, 0.11

mmol) in 2 mL of water. The solution was stirred for 1 h and the volatile materials were removed *in vacuo*. The resulting solid mixture was purified by the procedures described above to yield the title compound (0.027 g, 30%). <sup>1</sup>H NMR (600.13 MHz, CD<sub>3</sub>CN) δ 8.66 (td, J = 4.8 Hz, 4H, py-H), 8.12 (td, J = 4.9 Hz, 8H, py-H), 7.59 (tt, J = 2.2 Hz, 2H, py-H), 7.56 (tt, J = 20.0, 1.5 Hz, 4H, py-H), 7.32-7.27 (m, 4H, py-H), 7.08-7.03 (m, 8H, py-H), 2.12 (s, 12H, OAc-H), 2.09 (s, 12H, OAc-H). IR (ATR, solid, ν(cm<sup>-1</sup>)): 1607 (m), 1527 (vs, br), 1484 (s), 1445 (s), 1409 (vs), 1339 (s), 1244 (w), 1215 (m), 1205 (m), 1158 (m), 1075 (m), 1041 (m, br), 980 (vw), 940 (w), 870 (vw), 789 (m, ν<sub>Ru-O-Ru</sub>), 771 (m), 758 (m), 690 (vs), 651 (m, br), 644 (m, br), 620 (vs), 587 (m), 563 (vs), 536 (s, br), 463 (m), 453 (m), 415 (w). Anal. Calcd for C<sub>46</sub>H<sub>54</sub>Co<sub>6</sub>N<sub>6</sub>O<sub>25</sub>Ru<sub>2</sub>: C, 33.55; H, 3.31; N, 5.10. Found: C, 33.35; H, 3.43; N, 4.78. HR-MS (ESI): Calcd. for [Ru<sub>2</sub>Co<sub>6</sub>O<sub>9</sub>(OAc)<sub>8</sub>(py)<sub>6</sub>]<sup>+</sup>·H<sup>+</sup>: m/z = 1648.7295. Found: m/z = 1648.7836.

## EPR Spectroscopy

### X-Band CW EPR Measurements:

Samples for X-band (~9.4 GHz) EPR spectroscopy were measured at the CalEPR center at the University of California, Davis (UC Davis). Continuous wave (CW) spectra were collected using a Bruker Instruments EleXsys-II E500 CW EPR spectrometer (Bruker Corporation, Billerica, MA) equipped with an Oxford Instruments ESR900 liquid helium cryostat and an Oxford Instruments ITC503 temperature and gas-flow controller. Samples were measured under non-saturating slow-passage conditions using a Super-High Q resonator (ER 4122SHQE). Unless otherwise stated, typical acquisition conditions were as follows: T = 20 K; 9.3858 GHz microwave frequency; 5G modulation amplitude; 1 μW microwave power.

### Pulse EPR and ENDOR Measurements:

All Q-band (34 GHz) pulse EPR studies were carried out at the UC Davis CalEPR center, using a Bruker EleXsys E580 pulse EPR spectrometer equipped with an Oxford-CF935 liquid helium cryostat and an ITC-503 temperature controller. Q-band pulse EPR and Davies electron nuclear double resonance (ENDOR) spectroscopy were performed using the same E580 EPR spectrometer along with a 1 kW ENI RF amplifier and an R.A. Isaacson-designed cylindrical TE011 resonator<sup>6</sup> adapted for pulse EPR in an Oxford Instruments CF935 cryostat. Two-pulse electron spin echo field swept (2PFS) EPR spectrum was collected using the pulse sequence π/2-τ-π-τ-echo, stepping the field after each point. Davies ENDOR spectra were acquired using the pulse sequence π-tRF-πRF-tRF-π/ 2-τ-π-echo, where πRF is the RF pulse length and tRF is a fixed delay separating MW and RF pulses.<sup>7</sup> Typical collection conditions were as follows: T = 6 K, 34.164 GHz microwave frequency, 12.1 mW microwave power, 96 ns inversion (π) pulse, τ = 500 ns, RF pulse length = 5 μs. To avoid saturation of the ENDOR transitions, data were collected using stochastic RF frequency jumping.<sup>8</sup> Spectral simulations were performed using the EasySpin 4.0 toolbox in Matlab.<sup>9</sup>

### ENDOR Notes:

In principle, the hyperfine-coupled cobalt centers should give rise to two peaks that are centered at the Larmor frequency of <sup>59</sup>Co (ν<sub>L</sub> = 12.8 MHz at 1270 mT) and split by the magnitude of the HFI. The absence of an observed partner peak at lower frequency (~0-5 MHz) can be attributed to the decreased sensitivity at low frequencies of the EPR probe in addition to hyperfine enhancement which will increase the intensity of the higher field peak at the expense of the lower field peak (Figure SEPR1).<sup>5</sup>

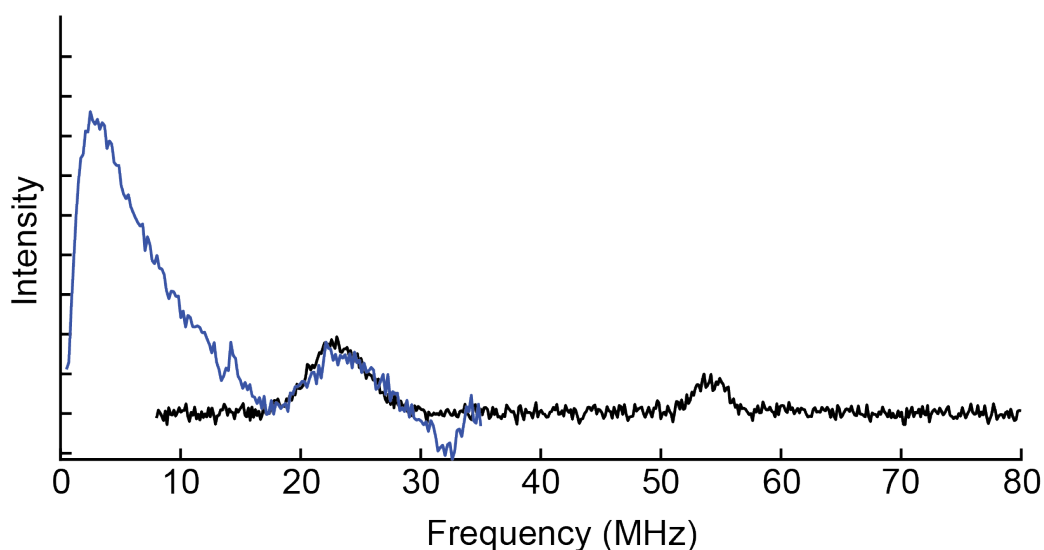

**Figure SEPR1.** Q-band Davies ENDOR of **1a** collected at 1270mT showing the data collected using a low field (Blue, 0-35 MHz) and high field (Black, 8-80 MHz) radio frequency amplifier. Due to a combination of poor matching of the radio frequency and ENDOR resonator, weak coupling of pyridine nitrogen at the  $^{14}\text{N}$  Lamour (3.9 MHz at 1270 mT), and hyperfine enhancement effects, the expected low field peak between ~0-5 MHz of the  $^{59}\text{Co}$  was not observed.

## X-ray crystallography

X-ray diffraction data for compound **1a** were collected at Beamline 11.3.1 (synchrotron radiation  $\lambda = 0.7749 \text{ \AA}$ ) and data for **1b**, **1d**, **2-MeCN**, **3**, **4**, and **5** were collected at Beamline 12.2.1 (synchrotron radiation  $\lambda = 0.7288 \text{ \AA}$ ) at the Advanced Light Source, Lawrence Berkeley National Laboratory using a Bruker AXS D8 diffractometer equipped with a Bruker PHOTON II detector. The crystals were cooled to 100 K using an Oxford Cryosystems Cryostream 700 Plus for data collection. Raw data were integrated and corrected for Lorentz and polarization effects using Bruker AXS SAINT software.<sup>10</sup> Data for **1a** were corrected for absorption using TWINABS.<sup>11</sup> Absorption corrections for **1b**, **1d**, **2-MeCN**, **3**, **4**, and **5** were applied using SADABS.<sup>12</sup> The structures were solved using intrinsic phasing with SHELXT<sup>13</sup> and refined using SHELXL<sup>14</sup> operated in the OLEX2 interface.<sup>15</sup> Thermal parameters were refined anisotropically for all non-hydrogen atoms. All hydrogen atoms were placed in ideal positions and refined using a riding model.

### Refinement details for $\text{Ru}(\text{O})\text{Co}_3(\mu_3\text{-O})_4(\text{OAc})_4(\text{py})_3$ (**1a**):

The crystal was found to be a two-component twin based on analysis of its diffraction pattern, and CELL\_NOW<sup>16</sup> was used to determine the orientation matrices. The diffraction pattern was indexed to two domains that were found to be related by a  $180^\circ$  rotation about the reciprocal axis  $[0\ 0\ 1]$ . TWINABS was used to produce a merged HKLF4 file for structure solution and initial refinement and an HKLF5 file for final structure refinement. The HKLF5 file contained all the reflections that involved in domain 2. TWINABS determined the twin fraction to be 48:52. Atomic displacement parameter restraints (RIGU and SIMU) were used on the disordered dichloromethane solvent molecules to obtain a stable refinement. Distance restraints (DFIX) were used for the C–Cl ( $1.729 \text{ \AA}$ ) and Cl $\cdots$ Cl ( $2.874 \text{ \AA}$ ) distances in some of the dichloromethane solvent molecules.

**Table SC1. Summary of crystallographic data for 1a**

|                                                     |                                                                                                                                   |
|-----------------------------------------------------|-----------------------------------------------------------------------------------------------------------------------------------|
| Empirical formula                                   | C <sub>48.97</sub> H <sub>59.94</sub> Cl <sub>5.94</sub> Co <sub>6</sub> N <sub>6</sub> O <sub>26</sub> Ru <sub>2</sub>           |
| Formula weight                                      | 1915.02                                                                                                                           |
| Temperature                                         | 100 K                                                                                                                             |
| Wavelength                                          | 0.7749 Å                                                                                                                          |
| Crystal system                                      | Monoclinic                                                                                                                        |
| Space group                                         | <i>P</i> 2 <sub>1</sub> / <i>c</i>                                                                                                |
| Unit cell dimensions                                | <i>a</i> = 15.1378(8) Å $\alpha$ = 90°<br><i>b</i> = 19.5659(9) Å $\beta$ = 96.458(3)°<br><i>c</i> = 23.2044(11) Å $\gamma$ = 90° |
| Volume                                              | 6829.2(6) Å <sup>3</sup>                                                                                                          |
| Z                                                   | 4                                                                                                                                 |
| Density (calculated)                                | 1.863 g/cm <sup>3</sup>                                                                                                           |
| Absorption coefficient                              | 2.658 mm <sup>-1</sup>                                                                                                            |
| F(000)                                              | 3819                                                                                                                              |
| Crystal size                                        | 0.084 x 0.056 x 0.042 mm                                                                                                          |
| Theta range for data collection                     | 1.476 to 36.210°                                                                                                                  |
| Index ranges                                        | -23 ≤ <i>h</i> ≤ 22, 0 ≤ <i>k</i> ≤ 29, 0 ≤ <i>l</i> ≤ 35                                                                         |
| Reflections collected                               | 25396                                                                                                                             |
| Independent reflections                             | 25396 [ <i>R</i> (int) = 0.1629]                                                                                                  |
| Absorption correction                               | Multi-scan                                                                                                                        |
| Data / restraints / parameters                      | 25396 / 126 / 931                                                                                                                 |
| Goodness-of-fit on F <sup>2</sup>                   | 1.078                                                                                                                             |
| Final <i>R</i> indices [ <i>I</i> > 2σ( <i>I</i> )] | <i>R</i> 1 = 0.0870, <i>wR</i> 2 = 0.1932                                                                                         |
| Final <i>R</i> indices (all data)                   | <i>R</i> 1 = 0.1173, <i>wR</i> 2 = 0.2117                                                                                         |
| Largest diff. peak and hole                         | 2.195 and -1.791 e/Å                                                                                                              |



**Refinement details for Ru(O)Co<sub>3</sub>(μ<sub>3</sub>-O)<sub>4</sub>(OAc)<sub>4</sub>(4-CF<sub>3</sub>-py)<sub>3</sub> (1b):**

The structure was refined as a two-component inversion twin.

**Table SC2. Summary of crystallographic data for 1b.**

|                                                     |                                                                                                                             |
|-----------------------------------------------------|-----------------------------------------------------------------------------------------------------------------------------|
| Empirical formula                                   | C <sub>27</sub> H <sub>26</sub> Cl <sub>2</sub> Co <sub>3</sub> F <sub>9</sub> N <sub>3</sub> O <sub>13</sub> Ru            |
| Formula weight                                      | 1120.27                                                                                                                     |
| Temperature                                         | 100 K                                                                                                                       |
| Wavelength                                          | 0.7288 Å                                                                                                                    |
| Crystal system                                      | Orthorhombic                                                                                                                |
| Space group                                         | <i>P</i> 2 <sub>1</sub> 2 <sub>1</sub> 2 <sub>1</sub>                                                                       |
| Unit cell dimensions                                | <i>a</i> = 13.6937(5) Å <i>α</i> = 90°<br><i>b</i> = 15.5925(5) Å <i>β</i> = 90°<br><i>c</i> = 217.7445(6) Å <i>γ</i> = 90° |
| Volume                                              | 3788.8(2) Å <sup>3</sup>                                                                                                    |
| Z                                                   | 4                                                                                                                           |
| Density (calculated)                                | 1.964 g/cm <sup>3</sup>                                                                                                     |
| Absorption coefficient                              | 2.054 mm <sup>-1</sup>                                                                                                      |
| F(000)                                              | 2212                                                                                                                        |
| Crystal size                                        | 0.1 × 0.1 × 0.02 mm                                                                                                         |
| Theta range for data collection                     | 3.566 to 60.062                                                                                                             |
| Index ranges                                        | -18 ≤ <i>h</i> ≤ 18, -21 ≤ <i>k</i> ≤ 21, -23 ≤ <i>l</i> ≤ 24                                                               |
| Reflections collected                               | 64502                                                                                                                       |
| Independent reflections                             | 10279 [ <i>R</i> <sub>int</sub> = 0.0720]                                                                                   |
| Absorption correction                               | Multi-scan                                                                                                                  |
| Data / restraints / parameters                      | 10279/0/528                                                                                                                 |
| Goodness-of-fit on <i>F</i> <sup>2</sup>            | 1.094                                                                                                                       |
| Final <i>R</i> indices [ <i>I</i> > 2σ( <i>I</i> )] | <i>R</i> 1 = 0.0442, <i>wR</i> 2 = 0.1040                                                                                   |
| Final <i>R</i> indices (all data)                   | <i>R</i> 1 = 0.0582, <i>wR</i> 2 = 0.1126                                                                                   |
| Largest diff. peak and hole                         | 1.04 and -1.04 e/Å                                                                                                          |

**Refinement details for Ru(O)Co<sub>3</sub>( $\mu_3$ -O)<sub>4</sub>(OAc)<sub>4</sub>(4-OMe-py)<sub>3</sub> (1d):**

The structure was refined as a two-component inversion twin. One of the two dichloromethane solvent molecules was disordered over two positions, which were modeled at 50:50 occupancies. RIGU restraints were applied to the disordered dichloromethane molecule to obtain reasonable atomic displacement parameters.

**Table SC3. Summary of crystallographic data for 1d.**

|                                                     |                                                                                                                            |
|-----------------------------------------------------|----------------------------------------------------------------------------------------------------------------------------|
| Empirical formula                                   | C <sub>28</sub> H <sub>37</sub> Cl <sub>4</sub> Co <sub>3</sub> N <sub>3</sub> O <sub>16</sub> Ru                          |
| Formula weight                                      | 1091.26                                                                                                                    |
| Temperature                                         | 100 K                                                                                                                      |
| Wavelength                                          | 0.7288 Å                                                                                                                   |
| Crystal system                                      | Orthorhombic                                                                                                               |
| Space group                                         | <i>P</i> 2 <sub>1</sub> 2 <sub>1</sub> 2 <sub>1</sub>                                                                      |
| Unit cell dimensions                                | $a = 11.3063(6)$ Å $\alpha = 90^\circ$<br>$b = 15.5087(8)$ Å $\beta = 90^\circ$<br>$c = 21.9831(11)$ Å $\gamma = 90^\circ$ |
| Volume                                              | 3854.6(3) Å <sup>3</sup>                                                                                                   |
| Z                                                   | 4                                                                                                                          |
| Density (calculated)                                | 1.880 g/cm <sup>3</sup>                                                                                                    |
| Absorption coefficient                              | 2.130 mm <sup>-1</sup>                                                                                                     |
| F(000)                                              | 2188                                                                                                                       |
| Crystal size                                        | 0.2 × 0.1 × 0.02 mm                                                                                                        |
| Theta range for data collection                     | 3.296 to 55.06                                                                                                             |
| Index ranges                                        | -14 ≤ <i>h</i> ≤ 14, -19 ≤ <i>k</i> ≤ 19, -27 ≤ <i>l</i> ≤ 27                                                              |
| Reflections collected                               | 57578                                                                                                                      |
| Independent reflections                             | 8226 [ <i>R</i> <sub>int</sub> = 0.0512]                                                                                   |
| Absorption correction                               | Multi-scan                                                                                                                 |
| Data / restraints / parameters                      | 8226/15/513                                                                                                                |
| Goodness-of-fit on <i>F</i> <sup>2</sup>            | 1.081                                                                                                                      |
| Final <i>R</i> indices [ <i>I</i> > 2σ( <i>I</i> )] | <i>R</i> 1 = 0.0507, <i>wR</i> 2 = 0.1468                                                                                  |
| Final <i>R</i> indices (all data)                   | <i>R</i> 1 = 0.0586, <i>wR</i> 2 = 0.1573                                                                                  |
| Largest diff. peak and hole                         | 1.12 and -1.48 e/Å                                                                                                         |

**Refinement details for [Ru(MeCN)Co<sub>3</sub>(μ<sub>3</sub>-O)<sub>4</sub>(OAc)<sub>4</sub>(4-OMe-py)<sub>3</sub>][BF<sub>4</sub>] (2-MeCN):**

One of the uncoordinated acetonitrile solvent molecules was disordered over two positions, which were modeled at 50:50 occupancies.

**Table SC4. Summary of crystallographic data for 2-MeCN.**

|                                                     |                                                                                                                                      |
|-----------------------------------------------------|--------------------------------------------------------------------------------------------------------------------------------------|
| Empirical formula                                   | C <sub>35</sub> H <sub>46.5</sub> BCo <sub>3</sub> F <sub>4</sub> N <sub>7.5</sub> O <sub>15</sub> Ru                                |
| Formula weight                                      | 1176.96                                                                                                                              |
| Temperature                                         | 100 K                                                                                                                                |
| Wavelength                                          | 0.7288 Å                                                                                                                             |
| Crystal system                                      | Monoclinic                                                                                                                           |
| Space group                                         | <i>P</i> 2 <sub>1</sub> / <i>n</i>                                                                                                   |
| Unit cell dimensions                                | <i>a</i> = 15.6166(10) Å <i>α</i> = 90°<br><i>b</i> = 14.8708(10) Å <i>β</i> = 99.329(3)°<br><i>c</i> = 20.7444(13) Å <i>γ</i> = 90° |
| Volume                                              | 4753.8(5) Å <sup>3</sup>                                                                                                             |
| Z                                                   | 4                                                                                                                                    |
| Density (calculated)                                | 1.644 g/cm <sup>3</sup>                                                                                                              |
| Absorption coefficient                              | 1.516 mm <sup>-1</sup>                                                                                                               |
| F(000)                                              | 2380                                                                                                                                 |
| Crystal size                                        | 0.2 × 0.2 × 0.05 mm                                                                                                                  |
| Theta range for data collection                     | 3.902 to 52.354                                                                                                                      |
| Index ranges                                        | -18 ≤ <i>h</i> ≤ 18, -17 ≤ <i>k</i> ≤ 17, -25 ≤ <i>l</i> ≤ 25                                                                        |
| Reflections collected                               | 41669                                                                                                                                |
| Independent reflections                             | 8498 [ <i>R</i> <sub>int</sub> = 0.0680]                                                                                             |
| Absorption correction                               | Multi-scan                                                                                                                           |
| Data / restraints / parameters                      | 8498/0/625                                                                                                                           |
| Goodness-of-fit on <i>F</i> <sup>2</sup>            | 1.153                                                                                                                                |
| Final <i>R</i> indices [ <i>I</i> > 2σ( <i>I</i> )] | <i>R</i> 1 = 0.1001, <i>wR</i> 2 = 0.1958                                                                                            |
| Final <i>R</i> indices (all data)                   | <i>R</i> 1 = 0.1399, <i>wR</i> 2 = 0.2201                                                                                            |
| Largest diff. peak and hole                         | 2.68 and -1.45 e/Å                                                                                                                   |

**Refinement details for Ru(OC<sub>18</sub>H<sub>29</sub>O)Co<sub>3</sub>( $\mu_3$ -O)<sub>4</sub>(OAc)<sub>4</sub>(py)<sub>3</sub> (3):**

Atomic displacement parameter restraints (RIGU and SIMU) were used on the disordered chloroform and pentane solvent molecules to obtain a stable refinement. Without these restraints, anisotropic refinement resulted in several atoms with very enlarged or elongated thermal ellipsoids, or non-positive definite atoms. Distance restraints (DFIX) were used for the C–Cl (1.76 Å) and 1,3-Cl $\cdots$ Cl (2.89 Å) distances in some of the chloroform solvent molecules. Distance restraints were also used for the C–C (1.54 Å) and 1,3-C $\cdots$ C (2.54 Å) distances in the disordered pentane molecule.

**Table SC5. Summary of crystallographic data for 3**

|                                                     |                                                                                                                               |
|-----------------------------------------------------|-------------------------------------------------------------------------------------------------------------------------------|
| Empirical formula                                   | C <sub>46.38</sub> H <sub>63.91</sub> Cl <sub>10.72</sub> Co <sub>3</sub> N <sub>3</sub> O <sub>14</sub> Ru                   |
| Formula weight                                      | 1545.14                                                                                                                       |
| Temperature                                         | 100 K                                                                                                                         |
| Wavelength                                          | 0.7288 Å                                                                                                                      |
| Crystal system                                      | Monoclinic                                                                                                                    |
| Space group                                         | <i>P</i> 2 <sub>1</sub> / <i>c</i>                                                                                            |
| Unit cell dimensions                                | <i>a</i> = 10.097(2) Å $\alpha$ = 90°<br><i>b</i> = 21.476(5) Å $\beta$ = 93.105(4)°<br><i>c</i> = 29.661(7) Å $\gamma$ = 90° |
| Volume                                              | 6422(3) Å <sup>3</sup>                                                                                                        |
| Z                                                   | 4                                                                                                                             |
| Density (calculated)                                | 1.598 g/cm <sup>3</sup>                                                                                                       |
| Absorption coefficient                              | 1.589 mm <sup>-1</sup>                                                                                                        |
| F(000)                                              | 3129                                                                                                                          |
| Crystal size                                        | 0.06 x 0.06 x 0.03 mm                                                                                                         |
| Theta range for data collection                     | 1.713 to 29.132°                                                                                                              |
| Index ranges                                        | -13 ≤ <i>h</i> ≤ 13, -28 ≤ <i>k</i> ≤ 28, -39 ≤ <i>l</i> ≤ 39                                                                 |
| Reflections collected                               | 105836                                                                                                                        |
| Independent reflections                             | 15952 [ <i>R</i> (int) = 0.0629]                                                                                              |
| Absorption correction                               | Multi-scan                                                                                                                    |
| Data / restraints / parameters                      | 15952 / 118 / 799                                                                                                             |
| Goodness-of-fit on F <sup>2</sup>                   | 1.075                                                                                                                         |
| Final <i>R</i> indices [ <i>I</i> > 2σ( <i>I</i> )] | <i>R</i> 1 = 0.0476, <i>wR</i> 2 = 0.1160                                                                                     |
| Final <i>R</i> indices (all data)                   | <i>R</i> 1 = 0.0574, <i>wR</i> 2 = 0.1215                                                                                     |
| Largest diff. peak and hole                         | 1.363 and -0.917 e/Å                                                                                                          |

**Refinement details for Ru(OC<sub>19</sub>H<sub>15</sub>)Co<sub>3</sub>( $\mu_3$ -O)<sub>4</sub>(OAc)<sub>4</sub>(py)<sub>3</sub> (4):**

The structure was refined as a two-component inversion twin. Distance restraints were used for the C–Cl distances in some of the dichloromethane solvent molecules. RIGU restraints were applied to some of the disordered chloroform molecules and one of the pyridine rings to obtain a stable refinement.

**Table SC6. Summary of crystallographic data for 4**

|                                                     |                                                                                                                             |
|-----------------------------------------------------|-----------------------------------------------------------------------------------------------------------------------------|
| Empirical formula                                   | C <sub>45</sub> H <sub>46</sub> Cl <sub>9</sub> Co <sub>3</sub> N <sub>3</sub> O <sub>13</sub> Ru                           |
| Formula weight                                      | 1433.76                                                                                                                     |
| Temperature                                         | 100 K                                                                                                                       |
| Wavelength                                          | 0.7288 Å                                                                                                                    |
| Crystal system                                      | Orthorhombic                                                                                                                |
| Space group                                         | <i>P</i> 2 <sub>1</sub> 2 <sub>1</sub> 2 <sub>1</sub>                                                                       |
| Unit cell dimensions                                | $a = 13.6058(7)$ Å $\alpha = 90^\circ$<br>$b = 20.0678(10)$ Å $\beta = 90^\circ$<br>$c = 26.2552(13)$ Å $\gamma = 90^\circ$ |
| Volume                                              | 7168.7(6) Å <sup>3</sup>                                                                                                    |
| Z                                                   | 4                                                                                                                           |
| Density (calculated)                                | 1.328 g/cm <sup>3</sup>                                                                                                     |
| Absorption coefficient                              | 1.353 mm <sup>-1</sup>                                                                                                      |
| F(000)                                              | 2876                                                                                                                        |
| Crystal size                                        | 0.15 x 0.15 x 0.03 mm                                                                                                       |
| Theta range for data collection                     | 3.458 to 52.346°                                                                                                            |
| Index ranges                                        | -16 ≤ <i>h</i> ≤ 16, -24 ≤ <i>k</i> ≤ 24, -31 ≤ <i>l</i> ≤ 31                                                               |
| Reflections collected                               | 91497                                                                                                                       |
| Independent reflections                             | 13260 [ <i>R</i> (int) = 0.1062]                                                                                            |
| Absorption correction                               | Multi-scan                                                                                                                  |
| Data / restraints / parameters                      | 13260 / 150 / 744                                                                                                           |
| Goodness-of-fit on F <sup>2</sup>                   | 1.024                                                                                                                       |
| Final <i>R</i> indices [ <i>I</i> > 2σ( <i>I</i> )] | <i>R</i> 1 = 0.0895, <i>wR</i> 2 = 0.2541                                                                                   |
| Final <i>R</i> indices (all data)                   | <i>R</i> 1 = 0.1129, <i>wR</i> 2 = 0.2777                                                                                   |
| Largest diff. peak and hole                         | 1.16 and -0.89 e/Å                                                                                                          |

**Refinement details for [(py)<sub>3</sub>(OAc)<sub>4</sub>Co<sub>3</sub>( $\mu_3$ -O)<sub>4</sub>Ru]–O–[RuCo<sub>3</sub>( $\mu_3$ -O)<sub>4</sub>(OAc)<sub>4</sub>(py)<sub>3</sub>] (5):**

Atomic displacement parameter restraints (RIGU and SIMU) were used on the disordered dichloroethane solvent molecules to obtain a stable refinement. Distance restraints (DFIX) were used for the C–Cl (1.74 Å), C–C (1.58 Å) and 1,3-C···Cl (2.725 Å) distances in some of the dichloroethane solvent molecules. A linear free variable (SUMP) was used on the three-component dichloroethane disorder to restrain the sum of the occupation factors to unity. Despite the restraints used to model the disorder, a level A alert was still reported by checkCIF. A response addressing this alert has been included in the CIF and can be read in the reports generated by checkCIF.

**Table SC7. Summary of crystallographic data for 5**

|                                                     |                                                                                                                                |
|-----------------------------------------------------|--------------------------------------------------------------------------------------------------------------------------------|
| Empirical formula                                   | C <sub>54</sub> H <sub>70</sub> Cl <sub>8</sub> Co <sub>6</sub> N <sub>6</sub> O <sub>25</sub> Ru <sub>2</sub>                 |
| Formula weight                                      | 2042.47                                                                                                                        |
| Temperature                                         | 100 K                                                                                                                          |
| Wavelength                                          | 0.7288 Å                                                                                                                       |
| Crystal system                                      | Monoclinic                                                                                                                     |
| Space group                                         | <i>P</i> 2 <sub>1</sub> / <i>c</i>                                                                                             |
| Unit cell dimensions                                | <i>a</i> = 21.308(5) Å $\alpha$ = 90°<br><i>b</i> = 14.505(3) Å $\beta$ = 93.693(4)°.<br><i>c</i> = 24.145(5) Å $\gamma$ = 90° |
| Volume                                              | 7447(3) Å <sup>3</sup>                                                                                                         |
| Z                                                   | 4                                                                                                                              |
| Density (calculated)                                | 1.822 g/cm <sup>3</sup>                                                                                                        |
| Absorption coefficient                              | 2.190 mm <sup>-1</sup>                                                                                                         |
| F(000)                                              | 4088                                                                                                                           |
| Crystal size                                        | 0.046 x 0.034 x 0.024 mm                                                                                                       |
| Theta range for data collection                     | 1.680 to 30.959°                                                                                                               |
| Index ranges                                        | -30 ≤ <i>h</i> ≤ 30, -20 ≤ <i>k</i> ≤ 20, -34 ≤ <i>l</i> ≤ 34                                                                  |
| Reflections collected                               | 133143                                                                                                                         |
| Independent reflections                             | 21916 [ <i>R</i> (int) = 0.0637]                                                                                               |
| Absorption correction                               | Multi-scan                                                                                                                     |
| Max. and min. transmission                          | 0.7461 and 0.6466                                                                                                              |
| Data / restraints / parameters                      | 21916 / 348 / 1040                                                                                                             |
| Goodness-of-fit on F <sup>2</sup>                   | 1.101                                                                                                                          |
| Final <i>R</i> indices [ <i>I</i> > 2σ( <i>I</i> )] | <i>R</i> 1 = 0.0584, <i>wR</i> 2 = 0.1198                                                                                      |
| Final <i>R</i> indices (all data)                   | <i>R</i> 1 = 0.0854, <i>wR</i> 2 = 0.1309                                                                                      |
| Largest diff. peak and hole                         | 1.352 and -1.076 e/Å                                                                                                           |

## Computational Details

Unrestricted DFT calculations were performed with the hybrid *meta*-GGA TPSSh functional,<sup>17</sup> as implemented in the Gaussian09 program.<sup>18</sup> The double- $\zeta$  def2SVP and triple- $\zeta$  def2TZVP basis sets<sup>19</sup> were used for geometry optimization and single-point energy refinement, respectively. This level of theory was benchmarked in a previous work.<sup>20</sup> Geometries were fully optimized without any geometry or symmetry constraint. Vibrational frequencies were computed analytically to confirm the energy minimum nature of the stationary points (*i.e.*, all frequencies were real numbers) and corrected with a scaling factor of 0.959.<sup>21</sup> Free energies were obtained by adding the thermodynamic energies determined with the def2SVP basis set (ZPE, thermal and entropy) to the potential energy determined with the def2TZVP basis set. Dispersion was included in the geometry optimizations and energy refinements by using Grimme's GD3 model.<sup>22</sup> The stability of the electron densities was verified by means of test calculations relaxing orbital constraints.<sup>23</sup> The pruned (99,590) grid was used to increase numerical accuracy in the calculation of two-electron integrals and to avoid spurious imaginary frequencies. Geometry optimizations were carried out in either gas phase, when comparing to experimental results obtained in the solid state (X-ray structures and IR frequencies), or with implicit solvation, when comparing to experimental results obtained in solution (redox potentials and UV-Vis spectra). Solvent effects were modeled by means of the CPCM continuum model.<sup>24</sup> UV-Vis spectra were simulated with TD-DFT( $\omega$ B97xd/def2TZVP) calculations.<sup>25</sup> Spin densities were obtained from natural population analysis with the NBO6 method and software.<sup>26</sup>

### Geometry optimization of the Ru(O)Co<sub>3</sub>( $\mu_3$ -O)<sub>4</sub>(OAc)<sub>4</sub>(py)<sub>3</sub> (**1a**)

The DFT geometry optimization of complex **1a** yielded a doublet Ru<sup>V</sup>( $S=1/2$ )Co<sup>III</sup><sub>3</sub>( $S=0$ ) ground state, in which the singly-occupied molecular orbital (SOMO) is the antibonding combination of the Ru( $d_{xz}$ ) and  $\kappa^1$ -O( $p_x$ ) orbitals. In line with the nature of the SOMO, **1a** has oxyl character, with 93% of the spin density ( $\rho$ ) delocalized over the Ru ( $\rho = 0.55\alpha$ ) and O ( $\rho = 0.38\alpha$ ) atoms of the Ru- $\kappa^1$ -oxo moiety. In the quartet state, this moiety also concentrates most of the spin density (85%;  $\rho = 2.56/3.00\alpha$ ). However, the doublet is 6.5 kcal mol<sup>-1</sup> more stable than the quartet. Further, the fully optimized geometry of the doublet state was in better agreement with the X-ray crystal structure, with low root-mean-square and maximum-deviations of 0.014 and 0.042 Å, respectively, over all metal-ligand bond distances. These deviations were clearly higher in the quartet state (*i.e.* 0.027 and 0.067 Å, respectively). Alternative configurations combining low- and high-spin Ru<sup>IV</sup> ( $S = 0$  and 1) and Ru<sup>V</sup> ( $S = 1/2$  and 3/2) centers with Co<sup>IV</sup> ( $S = 1/2$ ) and Co<sup>III</sup> ( $S = 1$ ) centers, respectively (*e.g.* Ru<sup>IV</sup>( $S=0$ )Co<sup>IV</sup>( $S=1/2$ )Co<sup>III</sup><sub>2</sub>( $S=0$ )), were also explored by splitting the initial guess of the density into fragments with different local charge and spin multiplicity. These calculations did not yield low-energy states with high-spin cobalt centers. The sextet spin state was also optimized, converging into a high-spin ferromagnetic-coupled state with the O<sup>-</sup>( $S=1/2$ )Ru<sup>IV</sup>( $S=1$ )Co<sup>III</sup>( $S=1$ )Co<sup>III</sup><sub>2</sub>( $S=0$ ) configuration. However, this was a high-energy state with an energy of 26.2 kcal mol<sup>-1</sup> relative to the doublet. In summary, the DFT calculations were consistent with a doublet ground state with the Ru<sup>V</sup>( $S=1/2$ )Co<sup>III</sup><sub>3</sub>( $S=0$ ) configuration.

### Gas phase DFT-optimized Cartesian coordinates (Å) and free energies (G, in hartrees) of **1a**

**1a**,  $S = 1/2$  | G = - 6279.13906734

|    |            |             |            |
|----|------------|-------------|------------|
| Ru | 5.46227700 | 10.78803900 | 7.45427100 |
| Co | 4.38056400 | 8.35094600  | 6.44608700 |
| Co | 6.37991400 | 8.25975000  | 8.40264600 |
| Co | 3.83713600 | 8.95069800  | 9.03132500 |
| O  | 6.13657600 | 9.00381500  | 6.68314600 |
| O  | 5.51885000 | 9.78035000  | 9.12006800 |
| O  | 4.68052500 | 7.56692900  | 8.10492300 |
| O  | 2.56327100 | 7.66344500  | 6.47005200 |

|   |             |             |             |
|---|-------------|-------------|-------------|
| O | 3.75129500  | 9.86013000  | 7.39073500  |
| O | 5.22603200  | 11.21587500 | 5.40015400  |
| O | 4.18023200  | 9.29331800  | 4.76698100  |
| O | 7.53997800  | 11.10939300 | 7.65956900  |
| O | 8.10450100  | 9.11446900  | 8.60489100  |
| O | 6.36144200  | 7.49383800  | 10.18875000 |
| O | 2.12724100  | 8.12868500  | 8.66248000  |
| O | 5.24930300  | 12.44007900 | 7.75040900  |
| N | 4.98812300  | 6.79824000  | 5.49573400  |
| O | 4.20239100  | 8.03789100  | 10.69452700 |
| N | 3.01562400  | 10.45593100 | 9.93161500  |
| N | 7.24698500  | 6.69363900  | 7.70766700  |
| C | 4.61112000  | 10.47304100 | 4.57955100  |
| C | 1.83312800  | 7.69015300  | 7.50787400  |
| C | 8.23610600  | 6.82614500  | 6.81004400  |
| H | 8.43838100  | 7.84839100  | 6.48997900  |
| C | 5.85697400  | 6.93794800  | 4.48223500  |
| H | 6.21034600  | 7.95470900  | 4.31092800  |
| C | 8.58229000  | 4.44684200  | 6.78462400  |
| H | 9.11147600  | 3.56170300  | 6.42381800  |
| C | 6.89003500  | 5.47677400  | 8.14676800  |
| H | 6.06078800  | 5.46356700  | 8.85414300  |
| C | 8.33820600  | 10.30188800 | 8.22016900  |
| C | 5.34125400  | 7.53498800  | 10.94289100 |
| C | 4.51273300  | 5.58533900  | 5.81780500  |
| H | 3.83467900  | 5.56516900  | 6.67112300  |
| C | 4.34181900  | 11.07384700 | 3.21489800  |
| H | 3.37649700  | 11.60353200 | 3.25851100  |
| H | 4.26935900  | 10.28447300 | 2.45526400  |
| H | 5.12242900  | 11.80207200 | 2.95939600  |
| C | 3.58882500  | 10.97959900 | 11.02674900 |
| H | 4.47815000  | 10.45957500 | 11.38332100 |
| C | 8.93192200  | 5.72004700  | 6.32547400  |
| H | 9.73071800  | 5.86132400  | 5.59550400  |
| C | 7.54118500  | 4.32463300  | 7.70938800  |
| H | 7.22780000  | 3.34984600  | 8.08687200  |
| C | 6.27273700  | 5.84487200  | 3.72457000  |
| H | 6.97970700  | 5.99173600  | 2.90633800  |
| C | 5.77426900  | 4.57681600  | 4.03702200  |
| H | 6.08010300  | 3.70187400  | 3.45855600  |
| C | 0.42209900  | 7.16348000  | 7.33764900  |
| H | -0.21515500 | 7.99056200  | 6.98454700  |
| H | 0.02793000  | 6.80335400  | 8.29657100  |
| H | 0.40127200  | 6.37156900  | 6.57738200  |
| C | 9.73713200  | 10.82341800 | 8.47893500  |
| H | 10.45937000 | 9.99639600  | 8.48452500  |
| H | 9.74727900  | 11.29877900 | 9.47302500  |
| H | 10.00529700 | 11.58114500 | 7.73146100  |
| C | 4.88184000  | 4.44602900  | 5.10493200  |
| H | 4.47625300  | 3.47407200  | 5.39075900  |
| C | 5.51702000  | 6.93586600  | 12.32405400 |
| H | 6.21501200  | 6.08905000  | 12.28335100 |
| H | 4.54753000  | 6.63049500  | 12.73781300 |
| H | 5.95557200  | 7.70418700  | 12.98134600 |
| C | 3.07909300  | 12.12189800 | 11.64116300 |
| H | 3.57134700  | 12.52443800 | 12.52789800 |
| C | 1.93654400  | 11.04204400 | 9.38900000  |
| H | 1.55428800  | 10.57063700 | 8.48354400  |
| C | 1.36968800  | 12.18608400 | 9.94663700  |



|   |            |             |             |
|---|------------|-------------|-------------|
| H | 0.49502800 | 12.64011200 | 9.47819700  |
| C | 1.94932500 | 12.73581900 | 11.09332600 |
| H | 1.53164300 | 13.63650100 | 11.54923800 |

**1a, S = 3/2 | G = - 6279.12872748**

|    |             |             |             |
|----|-------------|-------------|-------------|
| Ru | 5.45745800  | 10.74471600 | 7.45585700  |
| Co | 4.37550600  | 8.32114300  | 6.45258000  |
| Co | 6.37075700  | 8.22905000  | 8.40259000  |
| Co | 3.83573700  | 8.90894600  | 9.03015300  |
| O  | 6.13802700  | 8.93888100  | 6.67574800  |
| O  | 5.52766300  | 9.74419400  | 9.12614300  |
| O  | 4.67822900  | 7.52451400  | 8.10309300  |
| O  | 2.55012400  | 7.64345400  | 6.46956200  |
| O  | 3.74123300  | 9.82603300  | 7.38037100  |
| O  | 5.13124000  | 11.29295900 | 5.49076400  |
| O  | 4.20080100  | 9.33537000  | 4.78490000  |
| O  | 7.45407200  | 11.18467900 | 7.75738400  |
| O  | 8.08769500  | 9.15592500  | 8.58177900  |
| O  | 6.36158600  | 7.47137900  | 10.19680900 |
| O  | 2.12753300  | 8.09964300  | 8.66541800  |
| O  | 4.87586200  | 12.27744800 | 8.12548100  |
| N  | 4.97279100  | 6.77273800  | 5.48231600  |
| O  | 4.19932800  | 8.00843300  | 10.69161600 |
| N  | 3.03194200  | 10.43300100 | 9.91489700  |
| N  | 7.25751700  | 6.66467700  | 7.71815200  |
| C  | 4.58847200  | 10.52697900 | 4.62510500  |
| C  | 1.82424500  | 7.66880400  | 7.50960400  |
| C  | 8.24478500  | 6.80131100  | 6.81916200  |
| H  | 8.44511500  | 7.82526800  | 6.50329100  |
| C  | 5.85047400  | 6.91760100  | 4.47725800  |
| H  | 6.20168600  | 7.93627500  | 4.31256100  |
| C  | 8.59017600  | 4.42211300  | 6.77946700  |
| H  | 9.11788100  | 3.53873800  | 6.41218700  |
| C  | 6.90146400  | 5.44531200  | 8.15102700  |
| H  | 6.07390800  | 5.42803600  | 8.86048500  |
| C  | 8.29496100  | 10.35495900 | 8.24224200  |
| C  | 5.34013000  | 7.51240400  | 10.94810000 |
| C  | 4.50066700  | 5.55693300  | 5.79812300  |
| H  | 3.81425900  | 5.53167600  | 6.64469800  |
| C  | 4.36581400  | 11.14946000 | 3.26429900  |
| H  | 3.49365800  | 11.81909000 | 3.33104500  |
| H  | 4.16825400  | 10.37531200 | 2.51256200  |
| H  | 5.23486200  | 11.76125100 | 2.98576700  |
| C  | 3.62873200  | 10.97640800 | 10.98636300 |
| H  | 4.50729600  | 10.44575000 | 11.35287600 |
| C  | 8.94053400  | 5.69792100  | 6.32806400  |
| H  | 9.73919100  | 5.84287900  | 5.59859900  |
| C  | 7.55025000  | 4.29506300  | 7.70497700  |
| H  | 7.23626600  | 3.31811800  | 8.07638500  |
| C  | 6.27825500  | 5.82770400  | 3.72149600  |
| H  | 6.99119400  | 5.97897800  | 2.90920900  |
| C  | 5.78492700  | 4.55642800  | 4.02917100  |
| H  | 6.10180300  | 3.68350200  | 3.45357800  |
| C  | 0.40895500  | 7.15268700  | 7.34623100  |
| H  | -0.22337000 | 7.98449100  | 6.99546000  |
| H  | 0.01618000  | 6.79596700  | 8.30693600  |
| H  | 0.37930700  | 6.36056700  | 6.58642100  |

|   |             |             |             |
|---|-------------|-------------|-------------|
| C | 9.68976900  | 10.90097000 | 8.45552000  |
| H | 10.40902900 | 10.08286100 | 8.58560100  |
| H | 9.68079200  | 11.52101700 | 9.36603200  |
| H | 9.97180900  | 11.54818800 | 7.61378000  |
| C | 4.88343000  | 4.41983300  | 5.08877600  |
| H | 4.48158600  | 3.44520500  | 5.37083800  |
| C | 5.51066600  | 6.92508900  | 12.33451000 |
| H | 6.22323300  | 6.09005200  | 12.30701000 |
| H | 4.54181000  | 6.60644900  | 12.73969500 |
| H | 5.92752300  | 7.70567100  | 12.99151100 |
| C | 3.15804900  | 12.15343300 | 11.56409300 |
| H | 3.66990500  | 12.57176300 | 12.43218200 |
| C | 1.97181600  | 11.03532400 | 9.35539900  |
| H | 1.57357700  | 10.55022100 | 8.46458400  |
| C | 1.44358200  | 12.21408400 | 9.87617900  |
| H | 0.58351800  | 12.68090900 | 9.39359200  |
| C | 2.04542700  | 12.78333500 | 11.00098000 |
| H | 1.65974900  | 13.71272800 | 11.42655400 |

**1a, S = 5/2 | G = – 6279.09733282**

|    |            |             |             |
|----|------------|-------------|-------------|
| Ru | 5.40972400 | 10.80237900 | 7.45600600  |
| Co | 4.42021500 | 8.27227800  | 6.49878900  |
| Co | 6.40712300 | 8.32348500  | 8.47849200  |
| Co | 3.85163400 | 9.00103900  | 9.08662300  |
| O  | 6.13238400 | 8.97085500  | 6.72200500  |
| O  | 5.53785700 | 9.84650200  | 9.15736400  |
| O  | 4.71511500 | 7.59112600  | 8.19934600  |
| O  | 2.56913700 | 7.55278100  | 6.61544400  |
| O  | 3.67444700 | 9.96019400  | 7.45998700  |
| O  | 5.11923800 | 11.30157900 | 5.48060100  |
| O  | 4.26362100 | 9.30438300  | 4.79693100  |
| O  | 7.43151700 | 11.24657100 | 7.70882900  |
| O  | 8.10356600 | 9.26986000  | 8.62052900  |
| O  | 6.41854300 | 7.59374100  | 10.26853500 |
| O  | 2.16003200 | 8.14014900  | 8.78025900  |
| O  | 4.89186600 | 12.36474200 | 8.08925500  |
| N  | 4.93548500 | 6.58726500  | 5.27567200  |
| O  | 4.25083200 | 8.11512300  | 10.75712200 |
| N  | 3.03982200 | 10.50003900 | 9.98773400  |
| N  | 7.26550300 | 6.73051700  | 7.78740600  |
| C  | 4.63620700 | 10.49523800 | 4.61357800  |
| C  | 1.86419800 | 7.60429500  | 7.66861900  |
| C  | 8.39789300 | 6.81015900  | 7.07100100  |
| H  | 8.81544100 | 7.81126200  | 6.96552800  |
| C  | 6.06868400 | 6.69515100  | 4.56776800  |
| H  | 6.58651100 | 7.65297000  | 4.66794400  |
| C  | 8.37527400 | 4.43700300  | 6.68630400  |
| H  | 8.80922400 | 3.53485200  | 6.24886600  |
| C  | 6.66692100 | 5.54181600  | 7.96943800  |
| H  | 5.73296900 | 5.57659300  | 8.53286600  |
| C  | 8.28640700 | 10.46043000 | 8.22815000  |
| C  | 5.39482900 | 7.63036300  | 11.01774100 |
| C  | 4.23289500 | 5.44733700  | 5.24008500  |
| H  | 3.31599300 | 5.44844100  | 5.83358100  |
| C  | 4.46130600 | 11.07363600 | 3.22629600  |
| H  | 3.52399800 | 11.65263900 | 3.21203400  |
| H  | 4.39435400 | 10.27109400 | 2.48104600  |

|   |             |             |             |
|---|-------------|-------------|-------------|
| H | 5.28591700  | 11.76194700 | 2.99734800  |
| C | 3.64454000  | 11.05048500 | 11.05101100 |
| H | 4.54626600  | 10.54291900 | 11.39265900 |
| C | 8.98934200  | 5.68010200  | 6.50911800  |
| H | 9.91202500  | 5.78191200  | 5.93518400  |
| C | 7.19252300  | 4.36970100  | 7.42757100  |
| H | 6.67379800  | 3.42265300  | 7.58467100  |
| C | 6.55035300  | 5.64659000  | 3.78273200  |
| H | 7.47822800  | 5.76682700  | 3.22062800  |
| C | 5.82524200  | 4.45182500  | 3.74128000  |
| H | 6.17517000  | 3.61135300  | 3.13668000  |
| C | 0.51253000  | 6.92090300  | 7.60370600  |
| H | 0.08354600  | 7.02674700  | 6.59826600  |
| H | -0.16320800 | 7.32877900  | 8.36603900  |
| H | 0.65725100  | 5.84673200  | 7.80479200  |
| C | 9.67344000  | 11.03730700 | 8.41115400  |
| H | 10.39321800 | 10.24983300 | 8.66637100  |
| H | 9.63560800  | 11.77595900 | 9.22711100  |
| H | 9.97676600  | 11.56908500 | 7.49827400  |
| C | 4.64431800  | 4.34925200  | 4.48285200  |
| H | 4.04669700  | 3.43569500  | 4.47415100  |
| C | 5.57196300  | 7.05205000  | 12.40702200 |
| H | 6.25298700  | 6.19116100  | 12.37285600 |
| H | 4.60102700  | 6.77147700  | 12.83426600 |
| H | 6.03250800  | 7.82244600  | 13.04650700 |
| C | 3.15159800  | 12.20777500 | 11.65021300 |
| H | 3.67074400  | 12.63401900 | 12.51005200 |
| C | 1.94929500  | 11.07363200 | 9.45632700  |
| H | 1.54956100  | 10.58584300 | 8.56795100  |
| C | 1.39687100  | 12.22951200 | 10.00285900 |
| H | 0.51097100  | 12.67301600 | 9.54567400  |
| C | 2.00685200  | 12.80713900 | 11.11916200 |
| H | 1.60199200  | 13.71973500 | 11.56293700 |

### IR and UV-vis-NIR analysis of compound **1a**

The IR and UV-vis-NIR spectra of **1a** were investigated by means of DFT and TD-DFT calculations, respectively. In agreement with the experiments, the analytic calculation of the frequencies showed that the stretching of the terminal Ru<sup>V</sup>-oxo bond is IR-active (IR intensity = 141 km mol<sup>-1</sup>), with a predicted frequency of 904 cm<sup>-1</sup>. The UV-vis-NIR spectrum of **1a** was simulated with the aim of understanding the nature of the weak absorption observed at *ca.* 1000 nm. The closest absorption predicted by the TD-DFT calculations, at  $\lambda = 1007$  nm, has the SOMO – 3  $\rightarrow$  LUMO + 4 excitation as main component (Figure SCD1). This excitation can be classified as a CT transition between two cobalt centers across a  $\mu$ -oxo ligand, due to the Co(*d*)-O(*p*)-Co(*d*) nature of the molecular orbitals involved. In line with experimental spectrum, and owing to its *d-d* character, this transition has a very small intensity, with a predicted oscillator strength  $f < 0.0001$ .

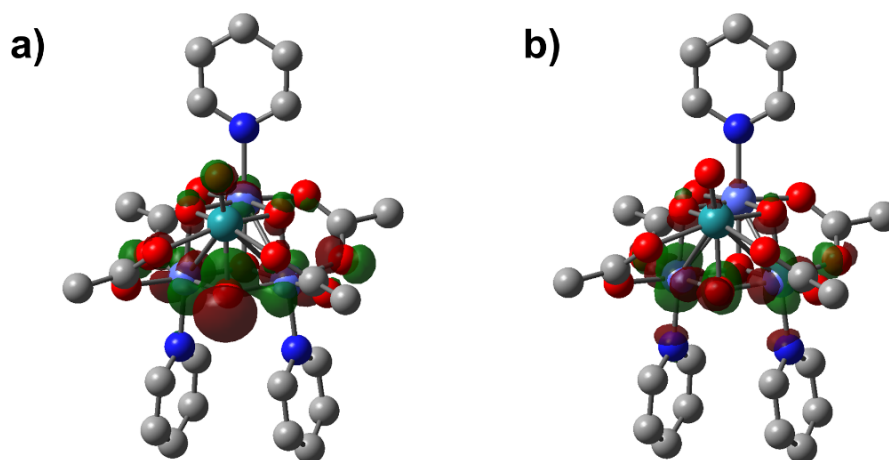

**Figure SCD1.** a) SOMO – 3 and b) LUMO + 4 orbitals of **1a** (0.05 isovalue) from TD-DFT calculations (doublet ground state).

#### Analysis for oxidation of **1a–d**

The geometry of the oxidized species **1a**<sup>+</sup> was fully optimized in fluorobenzene (used as solvent model of *ortho*-difluorobenzene), converging into a closed-shell singlet ground state with  $S = 0$  at all atomic centers. The triplet state also yielded an energy minimum, though it was 3.9 kcal mol<sup>-1</sup> less stable than the singlet state. In the triplet state, the spin density is mostly delocalized over Ru ( $\rho = 0.98\alpha$ ) and the terminal and  $\mu$ -oxo ligands ( $\Sigma\rho = 0.76\alpha$ ), with negligible contributions from the Co centers ( $\rho < 0.04\alpha$ ). Other electronic configurations were also explored for **1a**<sup>+</sup>, including triplet and quintet states combining low-spin and high-spin Ru<sup>V</sup> ( $S = 1/2$  and  $3/2$ ), Ru<sup>VI</sup> ( $S = 0$  and  $1$ ), Co<sup>III</sup> ( $S = 0$  and  $1$ ) and Co<sup>IV</sup> ( $S = 1/2$ ) centers, but none of these yielded a state with an energy lower than that of the singlet. The geometry of the reduced form (**1a**<sup>-</sup>) was also fully optimized in fluorobenzene (used as solvent model of *ortho*-difluorobenzene), which did not alter to any significant extent (*e.g.*  $\rho(\text{Ru}:\text{O}) = 0.56:0.36$  vs.  $0.55:0.38$  in gas phase). Considering the ground states of both **1a** (doublet) and **1a**<sup>+</sup> (singlet), the calculations predicted an oxidation potential of 0.41 V vs. Fc/Fc<sup>+</sup>, with a small deviation of 120 mV relative to the experimental value (0.53 V). In conclusion, these data and the nature of the SOMO of **1a** (Figure 8a), are consistent with the oxidation of the [Ru<sup>V</sup>Co<sup>III</sup>]<sub>3</sub> core in **1a** to [Ru<sup>VI</sup>Co<sup>III</sup>]<sub>3</sub> in **1a**<sup>+</sup>.

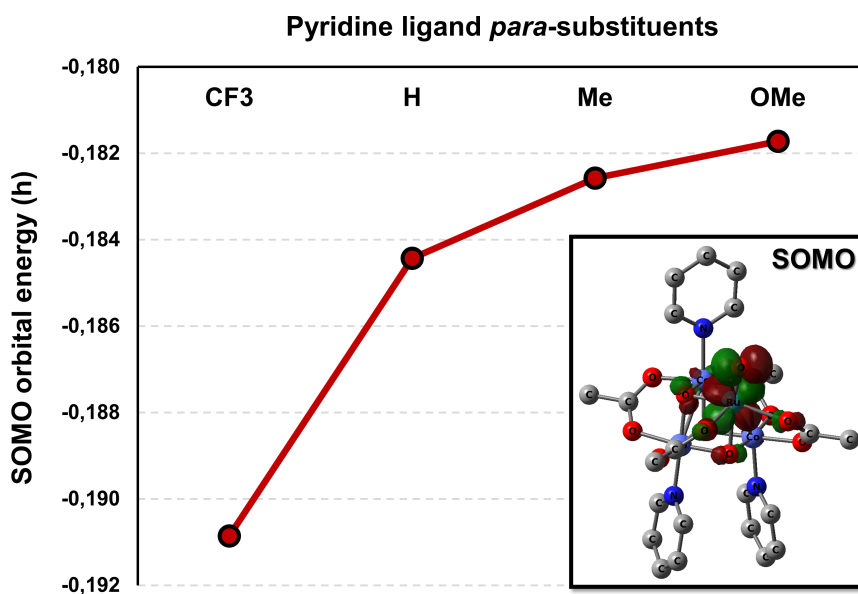

**Figure SCD2.** SOMO energy dependence on the nature of the *para*-substituents of the pyridine ligands.

**DFT/CPCM-optimized Cartesian coordinates (Å) and free energies (G, in hartrees) of 1a and 1a<sup>+</sup>**

**1a, S = 1/2 | G = – 6279.24409415**

|    |             |             |             |
|----|-------------|-------------|-------------|
| Ru | 5.48105800  | 10.79148900 | 7.43513400  |
| Co | 4.38506400  | 8.37250600  | 6.43927500  |
| Co | 6.38855200  | 8.28042500  | 8.39777800  |
| Co | 3.84358100  | 8.97794100  | 9.02743400  |
| O  | 6.14617100  | 9.02442500  | 6.67353000  |
| O  | 5.52709700  | 9.81564300  | 9.11424000  |
| O  | 4.68825100  | 7.59878800  | 8.09879300  |
| O  | 2.56232500  | 7.71000800  | 6.46157900  |
| O  | 3.75845600  | 9.89623000  | 7.38592700  |
| O  | 5.26243800  | 11.21571600 | 5.36707300  |
| O  | 4.17327400  | 9.31369600  | 4.75713000  |
| O  | 7.57341900  | 11.10754100 | 7.61838100  |
| O  | 8.11667600  | 9.13343300  | 8.61064700  |
| O  | 6.37442900  | 7.53844000  | 10.19013800 |
| O  | 2.14598200  | 8.13210700  | 8.66420900  |
| O  | 5.30704300  | 12.46285100 | 7.69359200  |
| N  | 4.98488600  | 6.81144800  | 5.49634400  |
| O  | 4.20359800  | 8.04194400  | 10.67692900 |
| N  | 2.99899400  | 10.45972500 | 9.94956300  |
| N  | 7.24736400  | 6.70561000  | 7.70958100  |
| C  | 4.63700300  | 10.47614500 | 4.54544100  |
| C  | 1.83729700  | 7.70966100  | 7.50520700  |
| C  | 8.24083000  | 6.82417000  | 6.81272200  |
| H  | 8.46397800  | 7.84029900  | 6.48859100  |
| C  | 5.85958600  | 6.93724900  | 4.48426100  |
| H  | 6.22075000  | 7.94801300  | 4.29699100  |
| C  | 8.55512300  | 4.44089000  | 6.78772400  |
| H  | 9.07068400  | 3.54913500  | 6.42513100  |
| C  | 6.87475900  | 5.49163400  | 8.14829600  |
| H  | 6.04426000  | 5.48070900  | 8.85360300  |
| C  | 8.37317500  | 10.30330100 | 8.19021000  |
| C  | 5.34796600  | 7.55361200  | 10.93919300 |
| C  | 4.50436400  | 5.60151500  | 5.82801500  |
| H  | 3.82245900  | 5.58351800  | 6.67770400  |
| C  | 4.39953900  | 11.05635000 | 3.16849800  |
| H  | 3.42563800  | 11.57211100 | 3.17487200  |
| H  | 4.36141000  | 10.25608600 | 2.41805100  |
| H  | 5.17824700  | 11.78898700 | 2.92128800  |
| C  | 3.55385900  | 10.96899100 | 11.06275300 |
| H  | 4.45050100  | 10.46107900 | 11.41875400 |
| C  | 8.92252100  | 5.70949300  | 6.32921500  |
| H  | 9.72172300  | 5.84109800  | 5.59859300  |
| C  | 7.51183600  | 4.33188500  | 7.71183900  |
| H  | 7.18300700  | 3.36192800  | 8.08726800  |
| C  | 6.27674900  | 5.83533900  | 3.74123700  |
| H  | 6.99055400  | 5.97215000  | 2.92784200  |
| C  | 5.77361400  | 4.57183800  | 4.06521200  |
| H  | 6.08316800  | 3.68991800  | 3.50050500  |
| C  | 0.43076200  | 7.17797600  | 7.34093200  |
| H  | -0.21986300 | 8.01413400  | 7.03712300  |
| H  | 0.05784300  | 6.77612900  | 8.29159000  |
| H  | 0.40082300  | 6.41413000  | 6.55334200  |
| C  | 9.78285300  | 10.80510900 | 8.41419800  |
| H  | 10.49290300 | 9.96805000  | 8.39780300  |
| H  | 9.82716200  | 11.27746100 | 9.40891500  |

|   |             |             |             |
|---|-------------|-------------|-------------|
| H | 10.04665700 | 11.55798100 | 7.66065300  |
| C | 4.87420500  | 4.45450400  | 5.12897700  |
| H | 4.46634600  | 3.48718300  | 5.42533100  |
| C | 5.51870800  | 6.94956100  | 12.31545500 |
| H | 6.24409900  | 6.12632900  | 12.28208200 |
| H | 4.55357800  | 6.60596400  | 12.70847700 |
| H | 5.91325800  | 7.72886300  | 12.98753600 |
| C | 3.01306000  | 12.08136800 | 11.70506100 |
| H | 3.48911600  | 12.46928300 | 12.60670900 |
| C | 1.90349900  | 11.03177900 | 9.42104500  |
| H | 1.52555800  | 10.57311100 | 8.50717700  |
| C | 1.30591400  | 12.14578100 | 10.00674100 |
| H | 0.41764900  | 12.58515400 | 9.55072000  |
| C | 1.86875900  | 12.68039800 | 11.16952700 |
| H | 1.42455500  | 13.55497900 | 11.64951100 |

**Fc<sup>+</sup>, S = 1/2 | G = - 1650.75747262**

|    |             |            |             |
|----|-------------|------------|-------------|
| Fe | -0.07630700 | 2.01912400 | 1.72045100  |
| C  | -1.73370300 | 2.39422300 | 2.87829400  |
| C  | -1.71571900 | 3.23995900 | 1.71832900  |
| C  | -1.80328500 | 1.03825700 | 2.42983200  |
| H  | -1.69077100 | 2.72420400 | 3.91489900  |
| C  | -1.77080300 | 2.39472700 | 0.56249100  |
| H  | -1.66428800 | 4.32741400 | 1.71611200  |
| C  | -1.82863400 | 1.04195900 | 1.00725600  |
| H  | -1.79021200 | 0.15350100 | 3.06451900  |
| H  | -1.74213900 | 2.72462700 | -0.47472400 |
| H  | -1.82630300 | 0.16034700 | 0.36794600  |
| C  | 1.62048600  | 2.39330700 | 0.56560500  |
| C  | 1.56347600  | 3.23939600 | 1.72073900  |
| C  | 1.67708200  | 1.04083700 | 1.01147300  |
| H  | 1.59395200  | 2.72246900 | -0.47190100 |
| C  | 1.57901100  | 2.39448700 | 2.88133700  |
| H  | 1.51240400  | 4.32686600 | 1.71763900  |
| C  | 1.64901900  | 1.03818900 | 2.43399400  |
| H  | 1.67571200  | 0.15875700 | 0.37280600  |
| H  | 1.53415200  | 2.72521800 | 3.91762400  |
| H  | 1.63441700  | 0.15390000 | 3.06930100  |

**1a<sup>+</sup>, S = 0 | G = - 6279.04840754**

|    |            |             |             |
|----|------------|-------------|-------------|
| Ru | 5.46669900 | 10.81609800 | 7.41885700  |
| Co | 4.40950500 | 8.38039000  | 6.43275500  |
| Co | 6.39811100 | 8.25907700  | 8.40171700  |
| Co | 3.83371500 | 8.98637100  | 9.00217800  |
| O  | 6.16474200 | 9.04728600  | 6.70170700  |
| O  | 5.51911200 | 9.80789100  | 9.03817000  |
| O  | 4.68937900 | 7.60667300  | 8.08595300  |
| O  | 2.60087900 | 7.73193500  | 6.43867500  |
| O  | 3.76596400 | 9.95948800  | 7.36998100  |
| O  | 5.26492000 | 11.16938900 | 5.43881900  |
| O  | 4.18552900 | 9.30941200  | 4.74796000  |
| O  | 7.55723800 | 11.05892300 | 7.48054700  |
| O  | 8.10937100 | 9.14390400  | 8.58974000  |
| O  | 6.35765500 | 7.55003800  | 10.18685600 |
| O  | 2.15931800 | 8.14802000  | 8.63681100  |

|   |             |             |             |
|---|-------------|-------------|-------------|
| O | 5.44414800  | 12.39688800 | 7.90971900  |
| N | 5.00868300  | 6.82762200  | 5.51313100  |
| O | 4.17796000  | 8.05419300  | 10.63061200 |
| N | 2.98592100  | 10.45808200 | 9.94088500  |
| N | 7.24928300  | 6.68296500  | 7.73350200  |
| C | 4.62226000  | 10.47397800 | 4.56776700  |
| C | 1.86189600  | 7.72045300  | 7.47444500  |
| C | 8.24372800  | 6.78960900  | 6.83466000  |
| H | 8.47141900  | 7.79835600  | 6.49134800  |
| C | 5.88353900  | 6.95109600  | 4.49893200  |
| H | 6.24834000  | 7.95789500  | 4.29959300  |
| C | 8.55912300  | 4.40691200  | 6.85082000  |
| H | 9.07618300  | 3.51013300  | 6.50387400  |
| C | 6.87701500  | 5.47577800  | 8.19469900  |
| H | 6.04821900  | 5.47028800  | 8.90143700  |
| C | 8.36668300  | 10.27739900 | 8.09306000  |
| C | 5.31688700  | 7.55984500  | 10.91740800 |
| C | 4.52490100  | 5.62061300  | 5.85509000  |
| H | 3.84264500  | 5.60387900  | 6.70369100  |
| C | 4.39596800  | 11.14497300 | 3.24239100  |
| H | 3.51092000  | 11.79429500 | 3.33646700  |
| H | 4.20710500  | 10.39079400 | 2.46924500  |
| H | 5.25690500  | 11.77371600 | 2.98194400  |
| C | 3.55224500  | 10.96679000 | 11.04969300 |
| H | 4.46151200  | 10.47339400 | 11.39391600 |
| C | 8.92511900  | 5.66758000  | 6.37016800  |
| H | 9.72441300  | 5.78861800  | 5.63824200  |
| C | 7.51641400  | 4.31138700  | 7.77690800  |
| H | 7.18962200  | 3.34806700  | 8.17000300  |
| C | 6.29861600  | 5.84412300  | 3.76426800  |
| H | 7.01128500  | 5.97692400  | 2.94966900  |
| C | 5.79522200  | 4.58321100  | 4.09723700  |
| H | 6.10415100  | 3.69805600  | 3.53786600  |
| C | 0.46731000  | 7.17518300  | 7.29745100  |
| H | -0.18145300 | 8.00037000  | 6.96200900  |
| H | 0.08243600  | 6.79230900  | 8.25050200  |
| H | 0.46108000  | 6.39504900  | 6.52596500  |
| C | 9.77550800  | 10.79636200 | 8.23744100  |
| H | 10.47333500 | 9.96134300  | 8.37416400  |
| H | 9.81165500  | 11.44199200 | 9.12940500  |
| H | 10.04899700 | 11.40208200 | 7.36419200  |
| C | 4.89646500  | 4.47163700  | 5.16183900  |
| H | 4.48771800  | 3.50694600  | 5.46431200  |
| C | 5.45432100  | 6.95156000  | 12.29057800 |
| H | 6.17220200  | 6.12203900  | 12.26503200 |
| H | 4.47792500  | 6.61828500  | 12.66253800 |
| H | 5.84512200  | 7.72635400  | 12.96971300 |
| C | 3.00297700  | 12.06413400 | 11.70901800 |
| H | 3.48783800  | 12.45250100 | 12.60545000 |
| C | 1.86837500  | 11.01165000 | 9.43722500  |
| H | 1.47229700  | 10.55167700 | 8.53182700  |
| C | 1.26298800  | 12.10986300 | 10.04286800 |
| H | 0.35721400  | 12.53410900 | 9.60803700  |
| C | 1.83855000  | 12.64593100 | 11.19853900 |
| H | 1.38737700  | 13.50811400 | 11.69367600 |

**Fc, S = 0 | G = -1650.93814144**

|    |             |            |             |
|----|-------------|------------|-------------|
| Fe | -0.07631500 | 2.01946800 | 1.72018100  |
| C  | -1.70275600 | 2.39580000 | 2.87815700  |
| C  | -1.70187900 | 3.23876700 | 1.71907200  |
| C  | -1.70211700 | 1.03290500 | 2.43465900  |
| H  | -1.68634200 | 2.73232400 | 3.91413200  |
| C  | -1.70044900 | 2.39683400 | 0.55924000  |
| H  | -1.68417800 | 4.32802400 | 1.71956500  |
| C  | -1.70066300 | 1.03354200 | 1.00152000  |
| H  | -1.68581600 | 0.15133800 | 3.07454800  |
| H  | -1.68191900 | 2.73429600 | -0.47639600 |
| H  | -1.68308200 | 0.15254500 | 0.36087900  |
| C  | 1.55015400  | 2.39586600 | 0.56226500  |
| C  | 1.54928000  | 3.23872000 | 1.72143000  |
| C  | 1.54947300  | 1.03293000 | 1.00563100  |
| H  | 1.53380000  | 2.73249100 | -0.47367900 |
| C  | 1.54781000  | 2.39667500 | 2.88118000  |
| H  | 1.53164000  | 4.32797800 | 1.72104200  |
| C  | 1.54799600  | 1.03342800 | 2.43876800  |
| H  | 1.53319400  | 0.15142500 | 0.36565600  |
| H  | 1.52930200  | 2.73403700 | 3.91684800  |
| H  | 1.53041400  | 0.15237000 | 3.07932400  |

**1b (CF<sub>3</sub>), S = ½ | G = -7290.80448607**

|    |            |             |             |
|----|------------|-------------|-------------|
| Ru | 5.48311900 | 10.79373200 | 7.43613300  |
| Co | 4.38266800 | 8.37749000  | 6.43502500  |
| Co | 6.38297600 | 8.27748700  | 8.40051200  |
| Co | 3.83935200 | 8.97645900  | 9.02153700  |
| O  | 6.14575700 | 9.02089300  | 6.67543700  |
| O  | 5.52415500 | 9.81027200  | 9.11292300  |
| O  | 4.68198400 | 7.59739900  | 8.09402100  |
| O  | 2.56200600 | 7.71433800  | 6.45308600  |
| O  | 3.75945100 | 9.89694900  | 7.38156100  |
| O  | 5.26926900 | 11.21916000 | 5.37235500  |
| O  | 4.18049400 | 9.31915500  | 4.75572500  |
| O  | 7.57116800 | 11.10276700 | 7.62522200  |
| O  | 8.11059200 | 9.12499400  | 8.61269500  |
| O  | 6.36243600 | 7.53220100  | 10.18932300 |
| O  | 2.14082600 | 8.13911300  | 8.65414700  |
| O  | 5.30659900 | 12.46203400 | 7.70248400  |
| N  | 4.98461100 | 6.82145200  | 5.48888000  |
| O  | 4.19294900 | 8.04405700  | 10.67191100 |
| N  | 3.00027600 | 10.46108400 | 9.94067700  |
| N  | 7.23785100 | 6.69964800  | 7.71708000  |
| C  | 4.64530500 | 10.48251100 | 4.54700000  |
| C  | 1.83362800 | 7.71497100  | 7.49496300  |
| C  | 8.23501700 | 6.81373600  | 6.82351000  |
| H  | 8.47542800 | 7.82843400  | 6.50853600  |
| C  | 5.87804200 | 6.95265300  | 4.49566600  |
| H  | 6.23873500 | 7.96398300  | 4.31254500  |
| C  | 8.50028100 | 4.43089500  | 6.77003300  |
| C  | 6.84594700 | 5.48911200  | 8.14446700  |
| H  | 6.01382200 | 5.48121000  | 8.84745100  |
| C  | 8.36958800 | 10.29657900 | 8.19621300  |
| C  | 5.33510400 | 7.55175000  | 10.93786100 |
| C  | 4.50255600 | 5.61020500  | 5.81353100  |
| H  | 3.80327600 | 5.58735100  | 6.64838400  |



|   |             |             |             |
|---|-------------|-------------|-------------|
| C | 4.41190700  | 11.06443600 | 3.17108100  |
| H | 3.43465300  | 11.57376900 | 3.17418400  |
| H | 4.38214200  | 10.26556700 | 2.41884200  |
| H | 5.18749700  | 11.80220000 | 2.92995600  |
| C | 3.56631600  | 10.97538700 | 11.04550900 |
| H | 4.46653900  | 10.47192100 | 11.39738600 |
| C | 8.89672000  | 5.69636600  | 6.32427100  |
| H | 9.69143000  | 5.81659500  | 5.58782300  |
| C | 7.45977000  | 4.32197100  | 7.69522700  |
| H | 7.11576100  | 3.35049900  | 8.04892800  |
| C | 6.32481700  | 5.85326600  | 3.76680500  |
| H | 7.06178900  | 5.98307700  | 2.97484200  |
| C | 5.82456700  | 4.59047000  | 4.09246500  |
| C | 0.42831800  | 7.18317800  | 7.32836800  |
| H | -0.22128100 | 8.01912800  | 7.02191800  |
| H | 0.05364000  | 6.78269000  | 8.27880000  |
| H | 0.40047800  | 6.41860200  | 6.54152600  |
| C | 9.77859900  | 10.79601300 | 8.42367500  |
| H | 10.48706900 | 9.95767200  | 8.41383600  |
| H | 9.81890000  | 11.27270000 | 9.41646100  |
| H | 10.04623200 | 11.54540400 | 7.66810000  |
| C | 4.89739800  | 4.46315200  | 5.13217400  |
| H | 4.50204000  | 3.49048700  | 5.42528700  |
| C | 5.50138200  | 6.94975300  | 12.31460500 |
| H | 6.22945800  | 6.12890300  | 12.28529000 |
| H | 4.53534300  | 6.60413800  | 12.70339900 |
| H | 5.89030300  | 7.73146900  | 12.98713800 |
| C | 3.03536800  | 12.09139500 | 11.68562500 |
| H | 3.51936300  | 12.49315700 | 12.57602100 |
| C | 1.90402300  | 11.03086400 | 9.41497400  |
| H | 1.51838600  | 10.57109300 | 8.50536600  |
| C | 1.30996000  | 12.14842200 | 9.99623100  |
| H | 0.42332000  | 12.59500400 | 9.54674800  |
| C | 1.88587100  | 12.68237100 | 11.15150700 |
| C | 1.26148000  | 13.87031000 | 11.84626700 |
| C | 9.20954500  | 3.20093900  | 6.25229000  |
| C | 6.26579600  | 3.36380700  | 3.32809700  |
| F | 2.19851800  | 14.70365600 | 12.33413000 |
| F | 0.50123700  | 13.47483400 | 12.88772900 |
| F | 0.47201600  | 14.57767500 | 11.01993600 |
| F | 10.41055100 | 3.04789500  | 6.84398700  |
| F | 9.43055700  | 3.29051200  | 4.92623100  |
| F | 8.50435800  | 2.08003900  | 6.47600500  |
| F | 7.41374800  | 3.57235900  | 2.66277900  |
| F | 6.45374000  | 2.31743700  | 4.15578400  |
| F | 5.33709600  | 2.99265000  | 2.42500600  |

**1b<sup>+</sup> (CF<sub>3</sub>), S = 0 | G = -7290.60269774**

|    |            |             |            |
|----|------------|-------------|------------|
| Ru | 5.46337900 | 10.82337400 | 7.41181300 |
| Co | 4.40368600 | 8.37793100  | 6.43197100 |
| Co | 6.39863100 | 8.26605700  | 8.39860900 |
| Co | 3.83650400 | 8.98652600  | 9.00037300 |
| O  | 6.15912800 | 9.04584400  | 6.69693000 |
| O  | 5.52092700 | 9.81176600  | 9.03140100 |
| O  | 4.69044000 | 7.60696100  | 8.08641600 |
| O  | 2.59802300 | 7.72502700  | 6.44428100 |
| O  | 3.76684100 | 9.95437800  | 7.36536500 |
| O  | 5.25779200 | 11.16339900 | 5.43435400 |

|   |             |             |             |
|---|-------------|-------------|-------------|
| O | 4.18041900  | 9.30096300  | 4.74685800  |
| O | 7.54787000  | 11.06369100 | 7.46679000  |
| O | 8.10767100  | 9.15174500  | 8.57730600  |
| O | 6.36285500  | 7.55732000  | 10.18293800 |
| O | 2.16144600  | 8.15059500  | 8.64134400  |
| O | 5.43426900  | 12.40145600 | 7.90620300  |
| N | 5.00312500  | 6.82431800  | 5.51354200  |
| O | 4.18482300  | 8.06355200  | 10.63115400 |
| N | 2.98900100  | 10.46067000 | 9.93791400  |
| N | 7.25274000  | 6.68804700  | 7.73436800  |
| C | 4.61440600  | 10.46653100 | 4.56429100  |
| C | 1.86061200  | 7.71696700  | 7.48170400  |
| C | 8.24475100  | 6.79223600  | 6.83500500  |
| H | 8.48439400  | 7.79962200  | 6.49681900  |
| C | 5.89241800  | 6.94836700  | 4.51192100  |
| H | 6.25791200  | 7.95465700  | 4.31274600  |
| C | 8.52402200  | 4.41156200  | 6.82330000  |
| C | 6.87047100  | 5.48191700  | 8.19071200  |
| H | 6.04478900  | 5.47747600  | 8.90061400  |
| C | 8.36138700  | 10.28583400 | 8.07958600  |
| C | 5.32450100  | 7.56967900  | 10.91752900 |
| C | 4.51743600  | 5.61917700  | 5.85281100  |
| H | 3.82200800  | 5.60010500  | 6.69025200  |
| C | 4.38525600  | 11.13560300 | 3.23929100  |
| H | 3.49098200  | 11.77254400 | 3.33126500  |
| H | 4.20858600  | 10.37937000 | 2.46526800  |
| H | 5.23876000  | 11.77576700 | 2.98272100  |
| C | 3.56351300  | 10.97526600 | 11.03920000 |
| H | 4.47704000  | 10.48848900 | 11.38020600 |
| C | 8.91049900  | 5.66807000  | 6.35275400  |
| H | 9.70198600  | 5.77731000  | 5.61217400  |
| C | 7.48927200  | 4.31351900  | 7.75953200  |
| H | 7.15065300  | 3.34843200  | 8.13676100  |
| C | 6.32928700  | 5.84222700  | 3.79225800  |
| H | 7.06268900  | 5.96806600  | 2.99577000  |
| C | 5.82564200  | 4.58217100  | 4.13198800  |
| C | 0.46702100  | 7.16918700  | 7.31092000  |
| H | -0.18408500 | 7.99301600  | 6.97667400  |
| H | 0.08664300  | 6.78731100  | 8.26611100  |
| H | 0.45944900  | 6.38809800  | 6.54050300  |
| C | 9.76772900  | 10.80999200 | 8.22048000  |
| H | 10.46823000 | 9.97801800  | 8.36135600  |
| H | 9.80100700  | 11.46036500 | 9.10910000  |
| H | 10.03831800 | 11.41237000 | 7.34407700  |
| C | 4.90603500  | 4.46584600  | 5.17600800  |
| H | 4.50803800  | 3.49708200  | 5.47600000  |
| C | 5.46547000  | 6.96672200  | 12.29187400 |
| H | 6.18560000  | 6.13919700  | 12.26799300 |
| H | 4.49039100  | 6.63256200  | 12.66631300 |
| H | 5.85530900  | 7.74532000  | 12.96721500 |
| C | 3.02113600  | 12.07512700 | 11.69641700 |
| H | 3.51271700  | 12.47832300 | 12.58188800 |
| C | 1.86913100  | 11.00896500 | 9.43785700  |
| H | 1.46678600  | 10.54737200 | 8.53648900  |
| C | 1.26416000  | 12.10939000 | 10.03915600 |
| H | 0.35909400  | 12.53891300 | 9.61041700  |
| C | 1.85118200  | 12.64685100 | 11.18678800 |
| C | 1.21785800  | 13.82203300 | 11.90012800 |
| C | 9.21063700  | 3.15408700  | 6.33479600  |

|   |             |             |             |
|---|-------------|-------------|-------------|
| C | 6.28396200  | 3.36220900  | 3.36200300  |
| F | 0.49560100  | 13.40573600 | 12.95741400 |
| F | 0.39470100  | 14.51006200 | 11.09250200 |
| F | 2.15158000  | 14.67174400 | 12.36196500 |
| F | 8.30760000  | 2.19956600  | 6.04070000  |
| F | 9.94557700  | 3.37983700  | 5.23550000  |
| F | 10.02796200 | 2.65418400  | 7.27918000  |
| F | 5.97878800  | 2.22373400  | 4.00202100  |
| F | 7.61715600  | 3.38835900  | 3.17441500  |
| F | 5.70951200  | 3.31663100  | 2.14669800  |

**1c (Me), S = ½ | G = -6397.18751928**

|    |            |             |             |
|----|------------|-------------|-------------|
| Ru | 5.46952100 | 10.79285700 | 7.43788500  |
| Co | 4.37834300 | 8.37247200  | 6.44324000  |
| Co | 6.38714500 | 8.28537200  | 8.39973400  |
| Co | 3.84043200 | 8.97590000  | 9.03362700  |
| O  | 6.13862000 | 9.02932700  | 6.67505000  |
| O  | 5.52188900 | 9.81911200  | 9.11721200  |
| O  | 4.68802900 | 7.59961400  | 8.10268800  |
| O  | 2.55877000 | 7.70110200  | 6.47004100  |
| O  | 3.74889200 | 9.89462300  | 7.39277000  |
| O  | 5.24535200 | 11.21842700 | 5.36927900  |
| O  | 4.15787000 | 9.31480500  | 4.76172900  |
| O  | 7.56294100 | 11.11484100 | 7.61523500  |
| O  | 8.11501100 | 9.14219500  | 8.60584900  |
| O  | 6.37893600 | 7.54637800  | 10.19398600 |
| O  | 2.14511400 | 8.12277800  | 8.67346500  |
| O  | 5.29344800 | 12.46457200 | 7.69617500  |
| N  | 4.98421800 | 6.81676800  | 5.49784600  |
| O  | 4.20656000 | 8.04082500  | 10.68309400 |
| N  | 2.99403700 | 10.45443900 | 9.95722000  |
| N  | 7.24458500 | 6.71037900  | 7.71291700  |
| C  | 4.61902300 | 10.47791800 | 4.54926400  |
| C  | 1.83680400 | 7.69714500  | 7.51563600  |
| C  | 8.22277000 | 6.81710500  | 6.80020900  |
| H  | 8.45501100 | 7.83064700  | 6.47376300  |
| C  | 5.85817300 | 6.94252400  | 4.48423100  |
| H  | 6.20175900 | 7.95638400  | 4.28156900  |
| C  | 8.51166300 | 4.41457700  | 6.73102600  |
| C  | 6.87430700 | 5.49403500  | 8.14952300  |
| H  | 6.05742400 | 5.48153500  | 8.87046500  |
| C  | 8.36683800 | 10.31210300 | 8.18336500  |
| C  | 5.35357700 | 7.55870000  | 10.94441800 |
| C  | 4.53256100 | 5.59936500  | 5.83686000  |
| H  | 3.84811900 | 5.57061000  | 6.68444000  |
| C  | 4.37678500 | 11.05816500 | 3.17286800  |
| H  | 3.40214700 | 11.57250900 | 3.18179700  |
| H  | 4.33782900 | 10.25801700 | 2.42229400  |
| H  | 5.15371800 | 11.79199900 | 2.92351600  |
| C  | 3.54713800 | 10.97208000 | 11.06731200 |
| H  | 4.44511700 | 10.46895900 | 11.42700200 |
| C  | 8.87586900 | 5.69715400  | 6.29312800  |
| H  | 9.65615300 | 5.83009200  | 5.54146700  |
| C  | 7.48591100 | 4.33435700  | 7.68879200  |
| H  | 7.14518500 | 3.36701500  | 8.06299600  |
| C  | 6.30516200 | 5.84129000  | 3.76434600  |
| H  | 7.02520400 | 5.98865800  | 2.95712900  |
| C  | 5.84789800 | 4.55379100  | 4.09439800  |

|   |             |             |             |
|---|-------------|-------------|-------------|
| C | 0.43318800  | 7.15577100  | 7.35531800  |
| H | -0.22371200 | 7.98652500  | 7.05017800  |
| H | 0.06451100  | 6.75398900  | 8.30768700  |
| H | 0.40695600  | 6.38942600  | 6.56997000  |
| C | 9.77672500  | 10.81738600 | 8.40022700  |
| H | 10.48840700 | 9.98168700  | 8.38447700  |
| H | 9.82400000  | 11.29408100 | 9.39274900  |
| H | 10.03640300 | 11.56774700 | 7.64269000  |
| C | 4.93774800  | 4.45363900  | 5.15795900  |
| H | 4.55421100  | 3.48216600  | 5.47531900  |
| C | 5.52914600  | 6.95917000  | 12.32233100 |
| H | 6.26612700  | 6.14617600  | 12.29284500 |
| H | 4.56770400  | 6.60271400  | 12.71312800 |
| H | 5.90991900  | 7.74526200  | 12.99449300 |
| C | 3.00629700  | 12.08330000 | 11.70613300 |
| H | 3.48786500  | 12.46797100 | 12.60729900 |
| C | 1.89498700  | 11.02718800 | 9.43808200  |
| H | 1.50727400  | 10.56758000 | 8.52864800  |
| C | 1.30067400  | 12.14004100 | 10.02448400 |
| H | 0.40654000  | 12.57004500 | 9.56890300  |
| C | 1.85501100  | 12.69972700 | 11.18743400 |
| C | 1.26490000  | 13.92495300 | 11.83033600 |
| H | 1.75849900  | 14.82876100 | 11.43414900 |
| H | 0.18998200  | 14.01197300 | 11.61726200 |
| H | 1.41595000  | 13.91691100 | 12.91952500 |
| C | 9.17863100  | 3.17467400  | 6.20120300  |
| H | 9.81766800  | 2.72209700  | 6.97748800  |
| H | 8.42831600  | 2.42070000  | 5.91732000  |
| H | 9.80585500  | 3.39594900  | 5.32665200  |
| C | 6.31754600  | 3.34344000  | 3.33474600  |
| H | 5.83810600  | 3.30758400  | 2.34218800  |
| H | 7.40511700  | 3.38230900  | 3.17028200  |
| H | 6.07191000  | 2.41338900  | 3.86584100  |

**1c<sup>+</sup> (Me), S = 0 | G = -6396.99355111**

|    |            |             |             |
|----|------------|-------------|-------------|
| Ru | 5.45237900 | 10.81518100 | 7.42036200  |
| Co | 4.40069700 | 8.38009200  | 6.43708600  |
| Co | 6.39572400 | 8.26296500  | 8.40256400  |
| Co | 3.82921700 | 8.98342500  | 9.00874900  |
| O  | 6.15530300 | 9.05180600  | 6.70216800  |
| O  | 5.51233700 | 9.80978800  | 9.04013700  |
| O  | 4.68779800 | 7.60653900  | 8.08982000  |
| O  | 2.59581100 | 7.72144700  | 6.44806200  |
| O  | 3.75262000 | 9.95713200  | 7.37754800  |
| O  | 5.24383500 | 11.17196300 | 5.43988800  |
| O  | 4.16644900 | 9.30949700  | 4.75297200  |
| O  | 7.54449600 | 11.06655500 | 7.47683600  |
| O  | 8.10631600 | 9.15228400  | 8.58294300  |
| O  | 6.36216000 | 7.55696800  | 10.18926800 |
| O  | 2.15702200 | 8.13771800  | 8.64697900  |
| O  | 5.42821900 | 12.39715900 | 7.90924800  |
| N  | 5.00670300 | 6.83374000  | 5.51494400  |
| O  | 4.18109100 | 8.05190900  | 10.63681900 |
| N  | 2.98138600 | 10.45184400 | 9.94820500  |
| N  | 7.24494500 | 6.68737200  | 7.73521400  |
| C  | 4.60013400 | 10.47490900 | 4.57128100  |
| C  | 1.86006000 | 7.70651600  | 7.48598100  |
| C  | 8.22551700 | 6.78197400  | 6.82194900  |

|   |             |             |             |
|---|-------------|-------------|-------------|
| H | 8.46195500  | 7.78797500  | 6.47595800  |
| C | 5.88135400  | 6.95778500  | 4.49942100  |
| H | 6.22868900  | 7.96772700  | 4.28567300  |
| C | 8.51916200  | 4.37902100  | 6.79728500  |
| C | 6.87510200  | 5.47744400  | 8.19407400  |
| H | 6.05860800  | 5.47040600  | 8.91492100  |
| C | 8.35831400  | 10.28627700 | 8.08470300  |
| C | 5.32286600  | 7.56372500  | 10.92182800 |
| C | 4.55122400  | 5.61899900  | 5.86279600  |
| H | 3.86584900  | 5.59089900  | 6.70880300  |
| C | 4.36763500  | 11.14492300 | 3.24619000  |
| H | 3.48218100  | 11.79327000 | 3.34311000  |
| H | 4.17677700  | 10.39014600 | 2.47410300  |
| H | 5.22674700  | 11.77460200 | 2.98191900  |
| C | 3.54722800  | 10.96974500 | 11.05333500 |
| H | 4.45762200  | 10.48053300 | 11.40086200 |
| C | 8.88059400  | 5.65481600  | 6.33645500  |
| H | 9.66264600  | 5.77762200  | 5.58540200  |
| C | 7.49101600  | 4.31313400  | 7.75420400  |
| H | 7.15259700  | 3.35256200  | 8.14656700  |
| C | 6.32570100  | 5.85247300  | 3.78697500  |
| H | 7.04420300  | 5.99688200  | 2.97838400  |
| C | 5.86736300  | 4.56650600  | 4.12397400  |
| C | 0.46870200  | 7.15096900  | 7.31314500  |
| H | -0.18648900 | 7.97006100  | 6.97530600  |
| H | 0.08782900  | 6.76891700  | 8.26815000  |
| H | 0.46685500  | 6.36772100  | 6.54474300  |
| C | 9.76711000  | 10.80827100 | 8.22187800  |
| H | 10.46673900 | 9.97551000  | 8.36299100  |
| H | 9.80477300  | 11.46124900 | 9.10840400  |
| H | 10.03748800 | 11.40765800 | 7.34322000  |
| C | 4.95716900  | 4.47217600  | 5.18830400  |
| H | 4.57091500  | 3.50373700  | 5.51024400  |
| C | 5.46587400  | 6.95952400  | 12.29650500 |
| H | 6.20165700  | 6.14578700  | 12.27660300 |
| H | 4.49453900  | 6.60557400  | 12.66287900 |
| H | 5.83426200  | 7.74361400  | 12.97753800 |
| C | 2.99976000  | 12.06683200 | 11.70824200 |
| H | 3.49170700  | 12.45200100 | 12.60321200 |
| C | 1.86078500  | 11.00690300 | 9.45436500  |
| H | 1.45409800  | 10.54552800 | 8.55423100  |
| C | 1.26039200  | 12.10529600 | 10.05992900 |
| H | 0.34925400  | 12.52029500 | 9.62535700  |
| C | 1.82789600  | 12.66730600 | 11.21554300 |
| C | 1.23026700  | 13.87554700 | 11.88033000 |
| H | 1.35592900  | 13.83206300 | 12.97182300 |
| H | 1.74285700  | 14.78570900 | 11.52514900 |
| H | 0.16218400  | 13.97799600 | 11.64367200 |
| C | 9.19236700  | 3.13296700  | 6.29405700  |
| H | 9.82294400  | 3.33950200  | 5.41875000  |
| H | 9.82858700  | 2.70033800  | 7.08376600  |
| H | 8.44582200  | 2.37051300  | 6.02391700  |
| C | 6.33796400  | 3.35383600  | 3.37159900  |
| H | 5.89991700  | 3.34351900  | 2.35982300  |
| H | 7.43199700  | 3.37095300  | 3.25229300  |
| H | 6.04920000  | 2.42458500  | 3.88089900  |

**1d (OMe), S = ½ | G = -6622.90538685**

|    |             |             |             |
|----|-------------|-------------|-------------|
| Ru | 5.51142000  | 10.80828800 | 7.49354400  |
| Co | 4.40014900  | 8.41907300  | 6.45355100  |
| Co | 6.39000600  | 8.27400200  | 8.43807900  |
| Co | 3.84499400  | 8.99210700  | 9.04953000  |
| O  | 6.16615300  | 9.04673000  | 6.71701000  |
| O  | 5.53808500  | 9.81166600  | 9.15989300  |
| O  | 4.68587200  | 7.61857500  | 8.10937600  |
| O  | 2.58029300  | 7.75052200  | 6.45838500  |
| O  | 3.78069700  | 9.93273600  | 7.42208000  |
| O  | 5.29936200  | 11.27529700 | 5.43223100  |
| O  | 4.18353700  | 9.39976800  | 4.79217200  |
| O  | 7.60990400  | 11.09242900 | 7.68267000  |
| O  | 8.13211600  | 9.09891700  | 8.64932700  |
| O  | 6.35492000  | 7.53535200  | 10.23347300 |
| O  | 2.14615400  | 8.15753300  | 8.66110900  |
| O  | 5.36443700  | 12.47822700 | 7.78179400  |
| N  | 5.00600300  | 6.87247600  | 5.48215200  |
| O  | 4.17960200  | 8.03940900  | 10.69546400 |
| N  | 3.00273500  | 10.46846400 | 9.98157900  |
| N  | 7.22848000  | 6.68130600  | 7.74748200  |
| C  | 4.65458100  | 10.56310400 | 4.60214000  |
| C  | 1.84979100  | 7.73826800  | 7.49750300  |
| C  | 8.03959000  | 6.76974000  | 6.68298900  |
| H  | 8.17223000  | 7.77299400  | 6.27691600  |
| C  | 5.74084000  | 6.99646700  | 4.35842100  |
| H  | 5.94410100  | 8.01554100  | 4.03362700  |
| C  | 8.37925700  | 4.38938900  | 6.65305600  |
| C  | 6.99344100  | 5.47176300  | 8.29526900  |
| H  | 6.32468200  | 5.46202200  | 9.15450200  |
| C  | 8.40240800  | 10.26702600 | 8.23522000  |
| C  | 5.32085000  | 7.55387700  | 10.97217800 |
| C  | 4.72030500  | 5.64677900  | 5.94518700  |
| H  | 4.14170700  | 5.61886300  | 6.86905800  |
| C  | 4.40605800  | 11.18242300 | 3.24405700  |
| H  | 3.50932000  | 11.81915700 | 3.31387200  |
| H  | 4.22684000  | 10.40451200 | 2.49119300  |
| H  | 5.25346000  | 11.81847600 | 2.95616100  |
| C  | 3.55684300  | 10.98306100 | 11.08991800 |
| H  | 4.45723800  | 10.48107400 | 11.44556300 |
| C  | 8.63866200  | 5.65669900  | 6.10231300  |
| H  | 9.26471000  | 5.79235900  | 5.22194400  |
| C  | 7.55520100  | 4.31133300  | 7.79194100  |
| H  | 7.33827400  | 3.34234300  | 8.24152100  |
| C  | 6.22125900  | 5.89860500  | 3.66626400  |
| H  | 6.82713900  | 6.02304400  | 2.76873900  |
| C  | 5.95316700  | 4.60799000  | 4.16092400  |
| C  | 0.44831800  | 7.19569600  | 7.32057100  |
| H  | -0.20115000 | 8.02064900  | 6.98532700  |
| H  | 0.06021300  | 6.81181500  | 8.27250100  |
| H  | 0.43682300  | 6.41464300  | 6.54929600  |
| C  | 9.82407400  | 10.74263600 | 8.44489200  |
| H  | 10.52114300 | 9.89658200  | 8.38359600  |
| H  | 9.89781400  | 11.17805900 | 9.45459200  |
| H  | 10.08308300 | 11.51715500 | 7.71197600  |
| C  | 5.16693100  | 4.48682900  | 5.32009800  |
| H  | 4.92167800  | 3.52170900  | 5.76004400  |
| C  | 5.47512400  | 6.95803700  | 12.35435400 |

|   |             |             |             |
|---|-------------|-------------|-------------|
| H | 6.25823400  | 6.18917000  | 12.35646800 |
| H | 4.51943900  | 6.54531000  | 12.70244700 |
| H | 5.77598000  | 7.76272200  | 13.04485000 |
| C | 3.03243100  | 12.09184400 | 11.74658600 |
| H | 3.52952200  | 12.46190600 | 12.64199500 |
| C | 1.90114700  | 11.05107600 | 9.46648600  |
| H | 1.51057400  | 10.59864400 | 8.55490800  |
| C | 1.30884800  | 12.15696200 | 10.05105000 |
| H | 0.41860500  | 12.61340700 | 9.61792500  |
| C | 1.87737900  | 12.70037200 | 11.22052900 |
| O | 6.49714400  | 3.57813500  | 3.49181100  |
| O | 8.84038900  | 3.22908900  | 6.15798500  |
| O | 1.26809100  | 13.77218700 | 11.74681800 |
| C | 6.28145500  | 2.24843300  | 3.97282800  |
| H | 5.20851300  | 1.99965000  | 3.97136800  |
| H | 6.81328400  | 1.59099900  | 3.27582800  |
| H | 6.69858800  | 2.13087300  | 4.98542300  |
| C | 1.80888300  | 14.36973100 | 12.92619100 |
| H | 1.15286100  | 15.21593300 | 13.15980000 |
| H | 1.80598900  | 13.65631200 | 13.76601200 |
| H | 2.83371300  | 14.73364100 | 12.74894100 |
| C | 9.64596900  | 3.25188400  | 4.97593600  |
| H | 9.89548100  | 2.20548200  | 4.76693900  |
| H | 9.08025800  | 3.67440900  | 4.13051300  |
| H | 10.57039400 | 3.82728900  | 5.14121200  |

**1d<sup>+</sup> (OMe), S = 0 | G = -6622.71205221**

|    |            |             |             |
|----|------------|-------------|-------------|
| Ru | 5.49453400 | 10.83562700 | 7.46618200  |
| Co | 4.41969800 | 8.42881800  | 6.44504600  |
| Co | 6.40369800 | 8.26070200  | 8.42905800  |
| Co | 3.84013800 | 9.00553900  | 9.02271000  |
| O  | 6.18028900 | 9.07471400  | 6.73263400  |
| O  | 5.53432900 | 9.81063400  | 9.07312600  |
| O  | 4.69078100 | 7.63136200  | 8.09345700  |
| O  | 2.61597200 | 7.77017500  | 6.44135500  |
| O  | 3.78378600 | 9.99804900  | 7.40458800  |
| O  | 5.29192900 | 11.22614100 | 5.49130900  |
| O  | 4.18224800 | 9.39308300  | 4.77981100  |
| O  | 7.59158400 | 11.05914100 | 7.53004800  |
| O  | 8.12857500 | 9.12140500  | 8.60912900  |
| O  | 6.35144100 | 7.55435000  | 10.21602300 |
| O  | 2.16425400 | 8.17565500  | 8.64013000  |
| O  | 5.49435300 | 12.41039600 | 7.97973000  |
| N  | 5.02330800 | 6.89213800  | 5.49810600  |
| O  | 4.16941800 | 8.05750900  | 10.64639200 |
| N  | 2.99922100 | 10.47097600 | 9.97064000  |
| N  | 7.23112700 | 6.67104800  | 7.75533200  |
| C  | 4.62707600 | 10.55740900 | 4.61700000  |
| C  | 1.87520500 | 7.74901900  | 7.47521900  |
| C  | 8.06794500 | 6.74820000  | 6.70825000  |
| H  | 8.22941900 | 7.74616500  | 6.30019600  |
| C  | 5.78719100 | 7.01655700  | 4.39147000  |
| H  | 6.02009000 | 8.03190000  | 4.07628600  |
| C  | 8.37775500 | 4.36352000  | 6.69346500  |
| C  | 6.96782100 | 5.46527200  | 8.30328800  |
| H  | 6.27998600 | 5.46210600  | 9.14680900  |
| C  | 8.39603000 | 10.25564100 | 8.12036300  |
| C  | 5.30623800 | 7.56509200  | 10.94065400 |

|   |             |             |             |
|---|-------------|-------------|-------------|
| C | 4.70319700  | 5.66768900  | 5.94694500  |
| H | 4.09708600  | 5.63771000  | 6.85210300  |
| C | 4.38537900  | 11.25853600 | 3.30988800  |
| H | 3.52640500  | 11.93592900 | 3.44033500  |
| H | 4.15034400  | 10.52548000 | 2.52920500  |
| H | 5.25943300  | 11.86331300 | 3.03603800  |
| C | 3.56511500  | 10.98434000 | 11.07560500 |
| H | 4.47649600  | 10.49447500 | 11.42010000 |
| C | 8.66636300  | 5.62747000  | 6.14605500  |
| H | 9.31584100  | 5.75402800  | 5.28164500  |
| C | 7.52669500  | 4.29913300  | 7.81483600  |
| H | 7.28846800  | 3.33473500  | 8.26297300  |
| C | 6.26549200  | 5.91649500  | 3.70535900  |
| H | 6.89438900  | 6.03891100  | 2.82386700  |
| C | 5.96705000  | 4.62532600  | 4.18510900  |
| C | 0.48544400  | 7.19219400  | 7.29176100  |
| H | -0.16525900 | 8.00737700  | 6.93634900  |
| H | 0.09274400  | 6.81995900  | 8.24579500  |
| H | 0.49299200  | 6.40075000  | 6.53171700  |
| C | 9.81567300  | 10.75026200 | 8.25126100  |
| H | 10.50363300 | 9.90127000  | 8.34653800  |
| H | 9.88050700  | 11.36499200 | 9.16325800  |
| H | 10.08081300 | 11.37992200 | 7.39257500  |
| C | 5.14788300  | 4.50858000  | 5.32348000  |
| H | 4.87299300  | 3.54470500  | 5.74802700  |
| C | 5.43433500  | 6.96034100  | 12.31672000 |
| H | 6.20715300  | 6.18174900  | 12.31992300 |
| H | 4.46833100  | 6.56027800  | 12.64896800 |
| H | 5.73921700  | 7.75803100  | 13.01322600 |
| C | 3.03539100  | 12.07867300 | 11.74840700 |
| H | 3.54171300  | 12.44815300 | 12.63866700 |
| C | 1.87619000  | 11.03771900 | 9.48055500  |
| H | 1.46702400  | 10.58455800 | 8.57762000  |
| C | 1.27902900  | 12.12882500 | 10.08395300 |
| H | 0.37219600  | 12.57139000 | 9.67181800  |
| C | 1.86063900  | 12.67407600 | 11.24765400 |
| O | 6.51343600  | 3.59665000  | 3.52770200  |
| O | 8.83143900  | 3.20031300  | 6.21234000  |
| O | 1.24680100  | 13.72872500 | 11.78983600 |
| C | 6.26675400  | 2.26161000  | 3.98726000  |
| H | 5.19115500  | 2.02997800  | 3.95182000  |
| H | 6.80972500  | 1.60738000  | 3.29657000  |
| H | 6.65512600  | 2.12910200  | 5.00903600  |
| C | 1.79143200  | 14.32891200 | 12.96952600 |
| H | 1.12223200  | 15.16083700 | 13.21484800 |
| H | 1.80916500  | 13.60812800 | 13.80211800 |
| H | 2.80672200  | 14.71176100 | 12.78042000 |
| C | 9.67244300  | 3.20322700  | 5.05190000  |
| H | 9.90540900  | 2.15127800  | 4.85411600  |
| H | 9.13843700  | 3.63487400  | 4.19101200  |
| H | 10.60199200 | 3.76056500  | 5.24483300  |

## NBO6 analysis

The role of the  $[\text{Co}_3\text{O}_4]$  subcluster in the stabilization of the oxidized RuO dopant moiety was also investigated in the DFT calculations. Natural bond orbital (NBO) analysis was carried out in the neutral  $[\text{Ru}^{\text{VO}}]$  (**1a**) and oxidized  $[\text{Ru}^{\text{VI}}\text{O}]^+$  (**1a<sup>+</sup>**) forms, including the calculations of the stabilization energy (SE) from second-order perturbation analysis, which quantifies the strength of the donor-acceptor



interactions. The strongest interactions involved  $\pi$ -electron donation from the  $p$  orbitals of the bridging-oxos to the  $d$  orbitals of ruthenium. These interactions were divided in two groups, *cis*- $\pi$  and *trans*- $\pi$ , depending on the orientation of the donor  $\mu$ -O( $p$ ) orbitals relative to the Ru–O bond axis. The calculation of the natural localized molecular orbitals (NLMOs) yielded two *cis*- $\pi$  interactions, one for each *cis*- $\mu$ -O ligand (shown for **1a**<sup>+</sup> in Figure SCD3). Both interactions were strong, as shown by their large SE values; e.g. 88.0 and 100.3 kcal mol<sup>−1</sup> in **1a**<sup>+</sup> (Table S8). Two *trans* interactions were also found, each one corresponding to a different  $p$  orbital of the *trans*- $\mu$ -O ligand. These interactions were weaker than the *cis*, yet significant (SE = 28.5 and 74.7 kcal mol<sup>−1</sup> in **1a**<sup>+</sup>) and, interestingly, they had relevant contributions from Co  $d$  orbitals. These *cis* and *trans* interactions were observed both in **1a** and **1a**<sup>+</sup>, though they were clearly stronger in the latter, with an overall increase of the SEs of 68.0 kcal mol<sup>−1</sup>. In summary, NBO analysis showed that, despite the spin densities suggesting a redox-innocent character of the [Co<sub>3</sub>O<sub>4</sub>] subcluster, it stabilizes the Ru<sup>VO</sup> dopant moiety of **1a** by strong  $\pi(p \rightarrow d)$  donation, facilitating the further oxidation of the system to **1a**<sup>+</sup>.

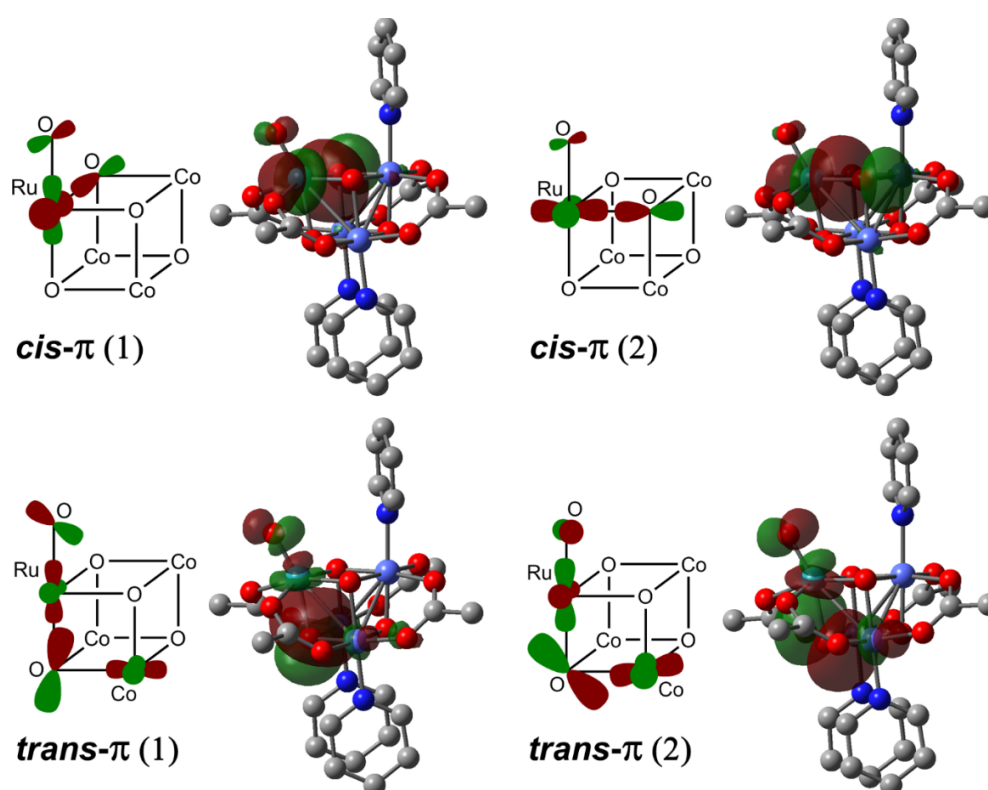

**Figure SCD3.** Selected NLMOs (natural localized molecular orbitals) associated with the covalent interactions between the [Co<sub>3</sub>O<sub>4</sub>] (donor) and RuO (acceptor) moieties. Orbitals were plotted for **1a**<sup>+</sup>, with a surface isovalue of 0.02.

**Table SCD1.** Stabilization energies (SE, in kcal mol<sup>−1</sup>) from NBO second-order perturbation analysis of the  $\pi(p \rightarrow d)$  donor-acceptor interactions, with donation in either *cis* (*cis*- $\pi$ ) or *trans* (*trans*- $\pi$ ) to the Ru–O bond.

|                        | <i>cis</i> - $\pi$ (1) | <i>cis</i> - $\pi$ (2) | <i>trans</i> - $\pi$ (1) | <i>trans</i> - $\pi$ (2) |
|------------------------|------------------------|------------------------|--------------------------|--------------------------|
| <b>1a</b>              | 71.8                   | 72.0                   | 76.4                     | 3.3                      |
| <b>1a</b> <sup>+</sup> | 100.3                  | 88.0                   | 74.7                     | 28.5                     |

## Supplementary Figures

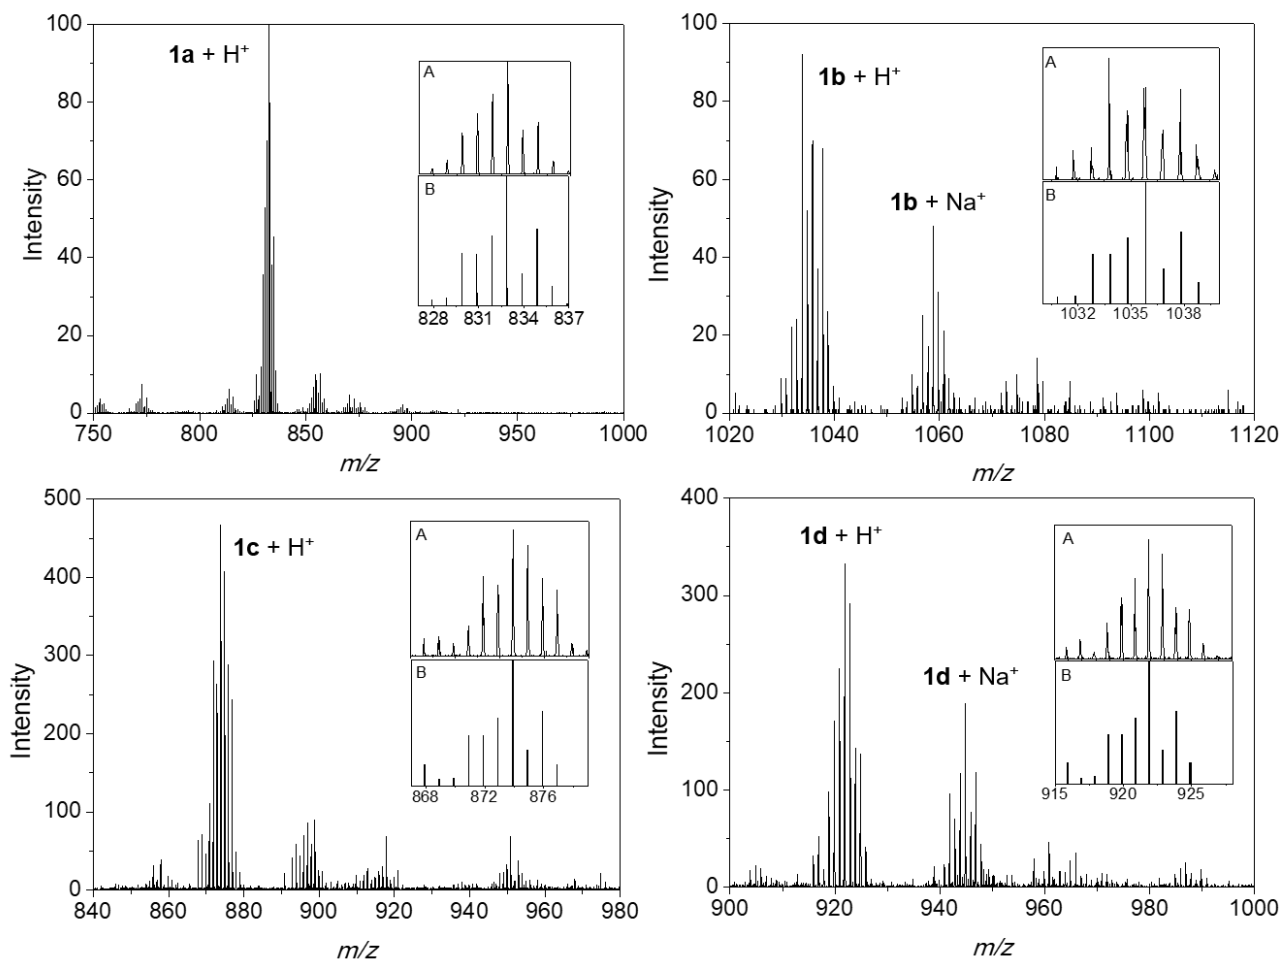

**Figure S1.** HR-ESI-MS spectra of **1a–d** dissolved in acetonitrile (inset: A is the enlarged spectrum of  $[Ru(O)Co_3(\mu_3-O)_4(OAc)_4(4-R-py)_3] \cdot H^+$ , and B is the simulated spectrum).

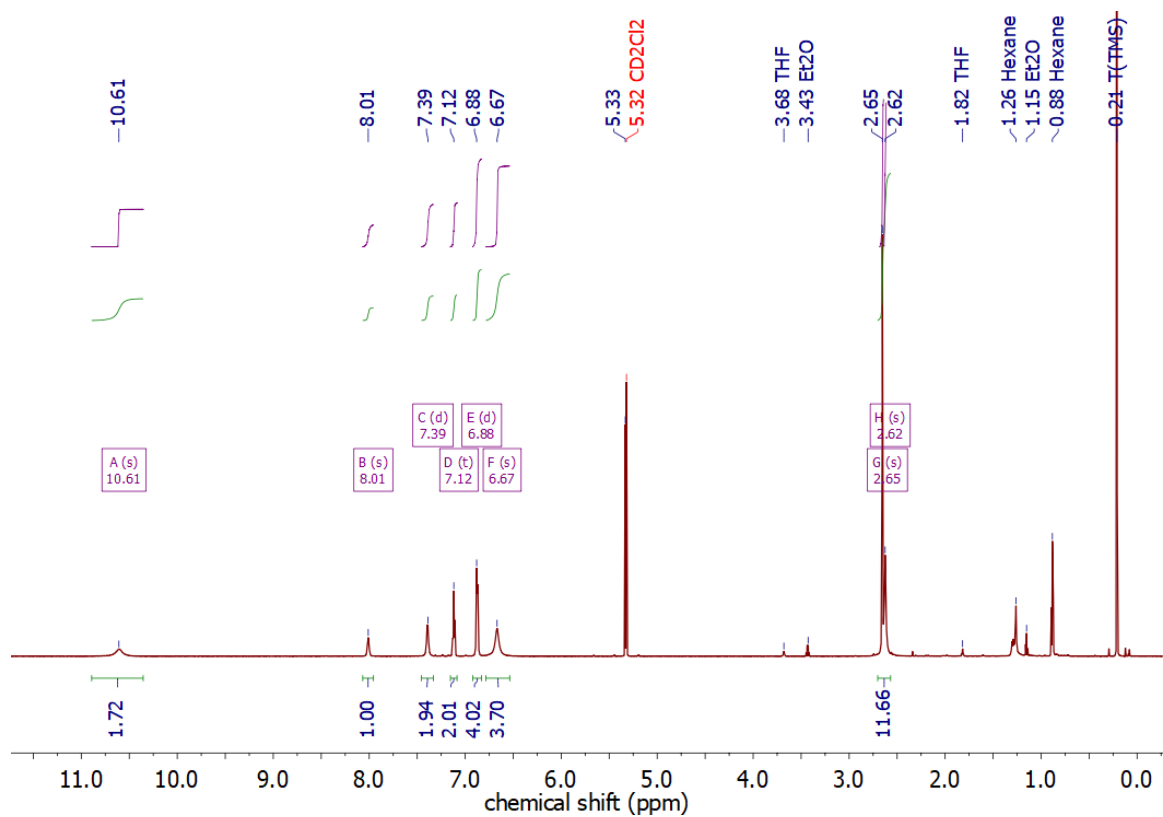

Figure S2. <sup>1</sup>H NMR spectrum of compound **1a** in CD<sub>2</sub>Cl<sub>2</sub>.

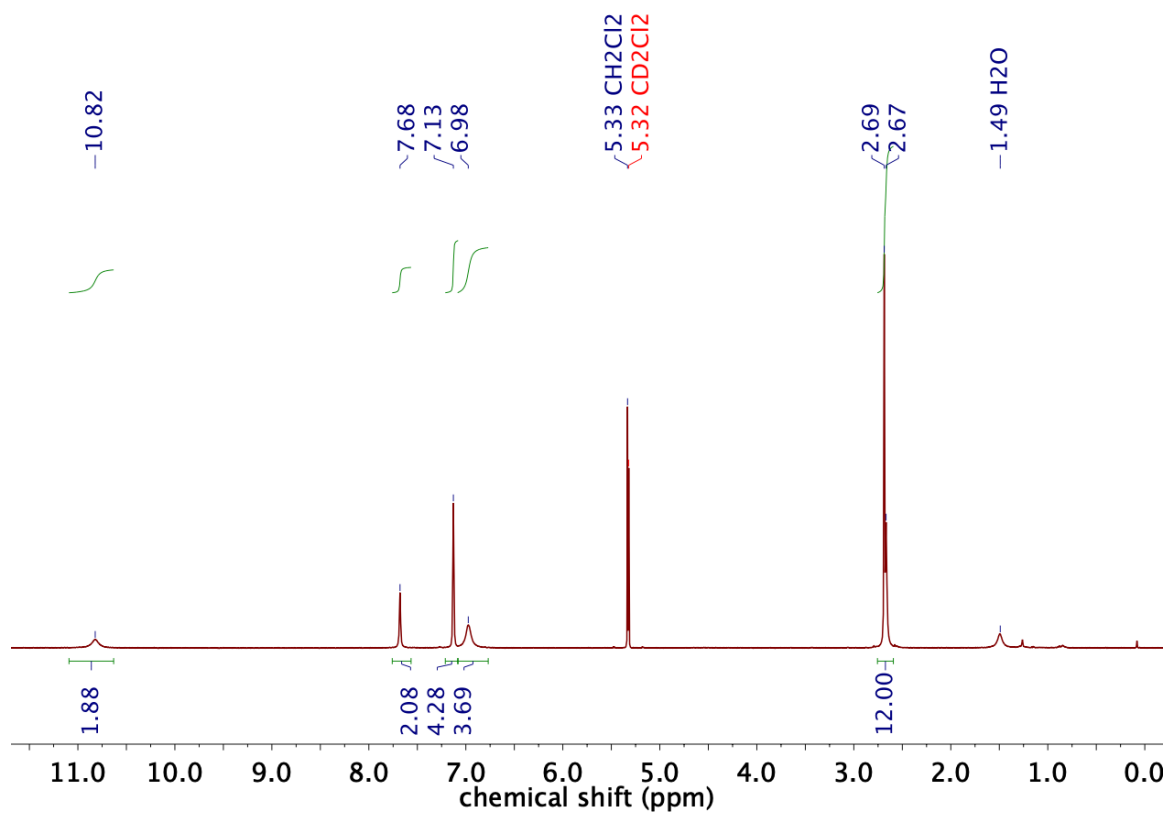

Figure S3. <sup>1</sup>H NMR spectrum of compound **1b** in CD<sub>2</sub>Cl<sub>2</sub>.

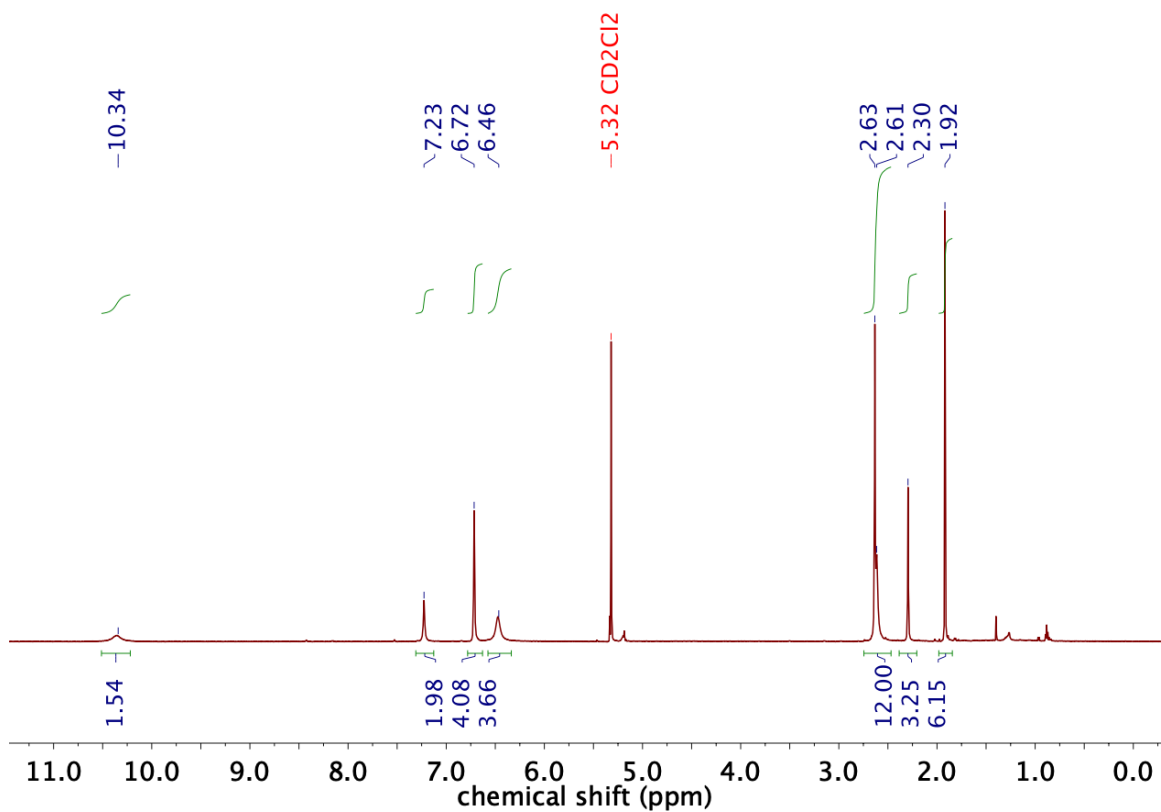

**Figure S4.** <sup>1</sup>H NMR spectrum of compound **1c** in CD<sub>2</sub>Cl<sub>2</sub>.

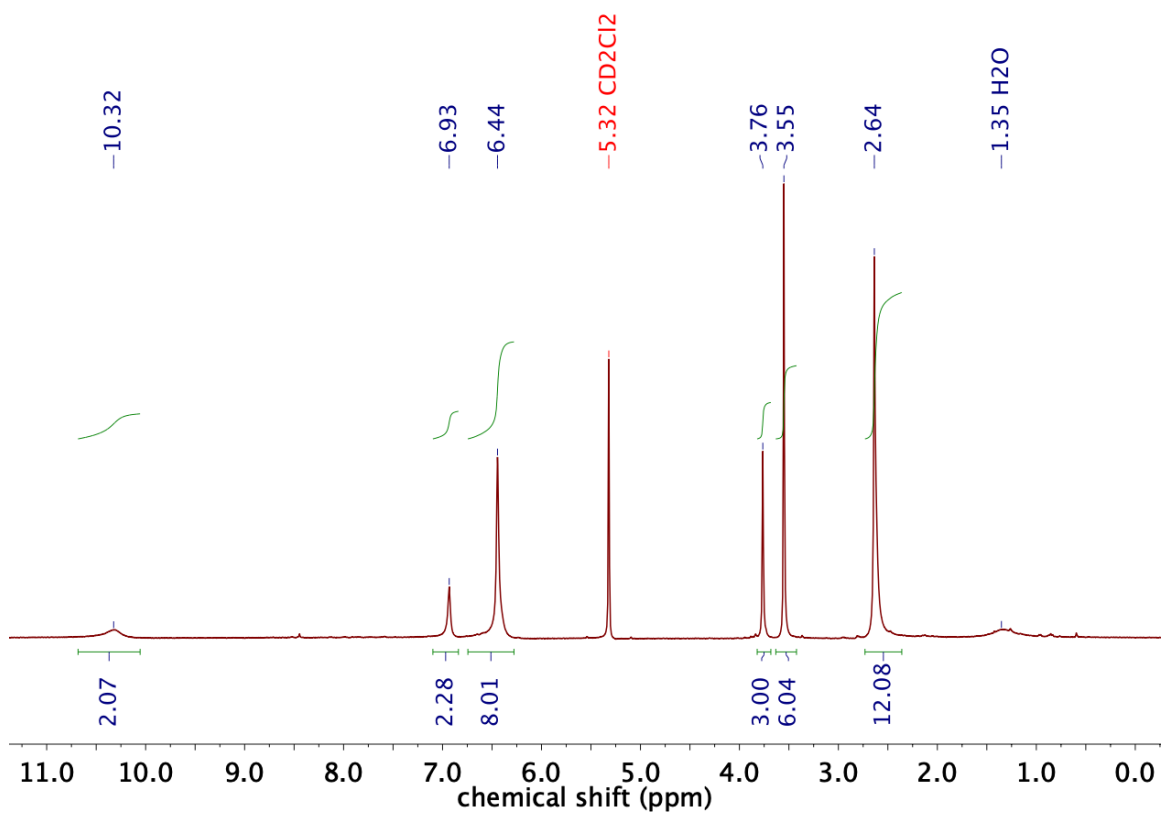

**Figure S5.** <sup>1</sup>H NMR spectrum of compound **1d** in CD<sub>2</sub>Cl<sub>2</sub>.

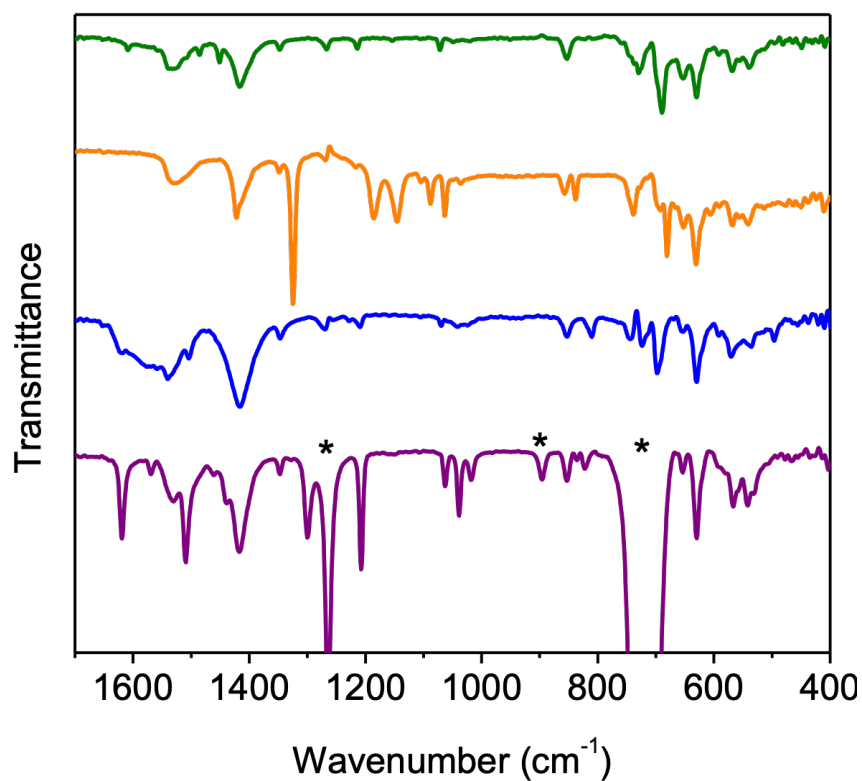

**Figure S6.** Solution-state IR spectra of **1a–d** in dichloromethane. The asterisks (\*) indicate vibrational wavenumbers associated with dichloromethane.

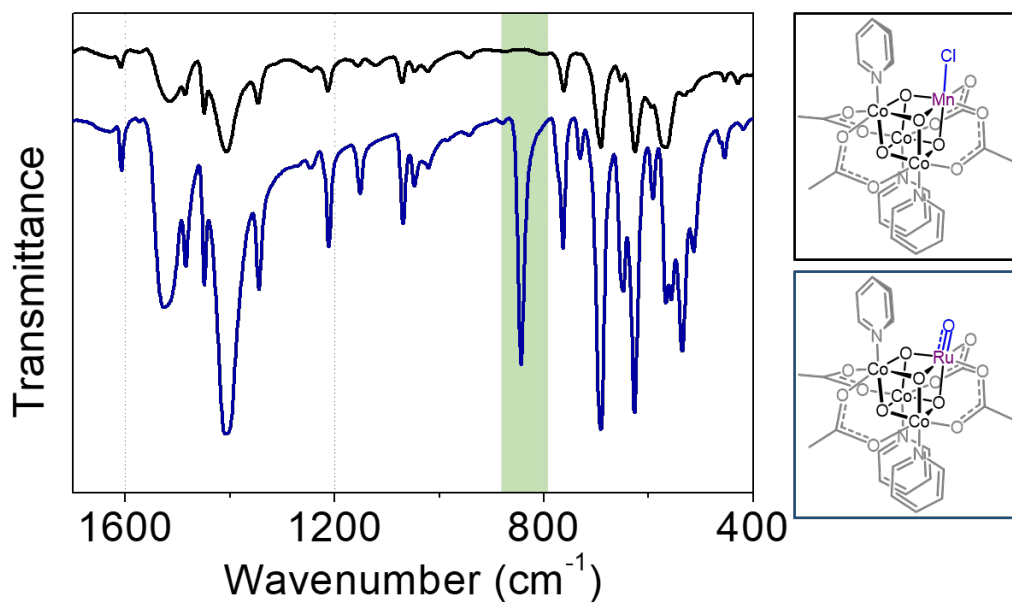

**Figure S7.** Solid-state IR spectra of compound  $\text{Mn}(\text{Cl})\text{Co}_3(\mu_3\text{-O})_4(\text{OAc})_4(\text{py})_3$  cubane (black) vs. **1a** (blue). There is a notable absence of the  $853\text{ cm}^{-1}$  band ( $\nu_{\text{Ru-O}}$ ) in the spectrum of the  $[\text{MnCo}_3\text{O}_4]$  cubane (highlighted in green).

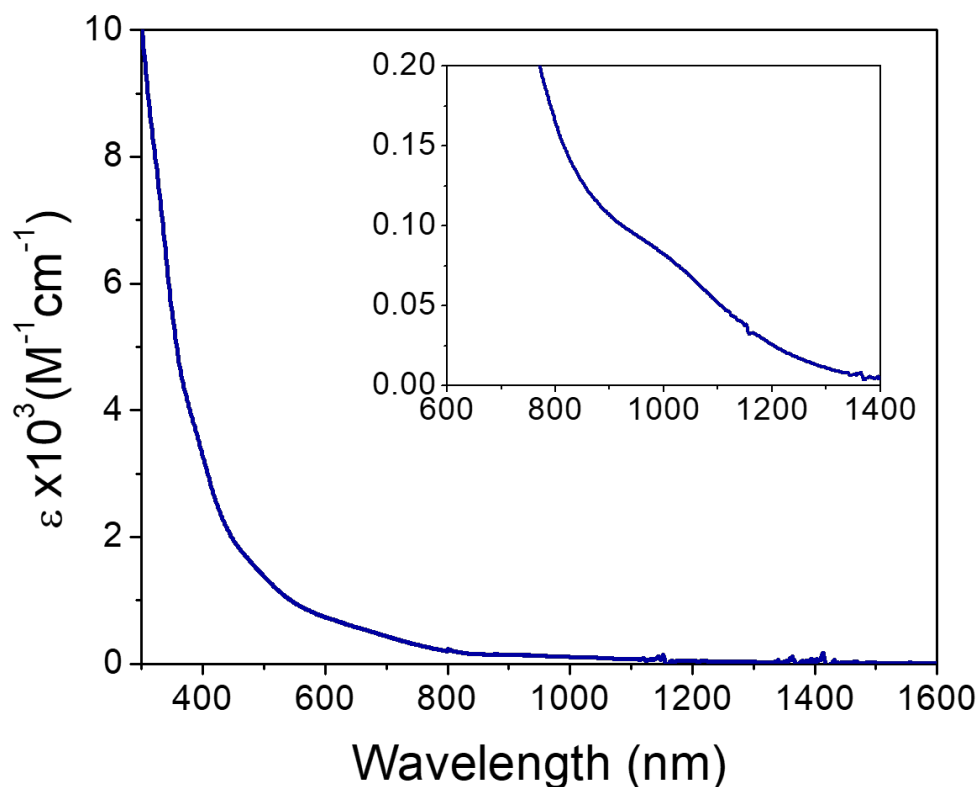

**Figure S8.** UV-vis-NIR spectrum of **1a** in dichloromethane at room temperature (inset: the enlarged curve for absorption at ~1000 nm). There are five broad absorption bands at around 330 ( $\epsilon = \sim 7500 \text{ M}^{-1} \text{ cm}^{-1}$ ), 400 ( $\epsilon = \sim 3300 \text{ M}^{-1} \text{ cm}^{-1}$ ), 480 ( $\epsilon = \sim 1600 \text{ M}^{-1} \text{ cm}^{-1}$ ), 650 ( $\epsilon = \sim 400 \text{ M}^{-1} \text{ cm}^{-1}$ ) and 1000 ( $\epsilon = \sim 80 \text{ M}^{-1} \text{ cm}^{-1}$ ) nm. Bands analogous to the 330 and 650 nm absorptions are observed for  $\text{Co}_4(\mu_3\text{-O})_4(\text{OAc})_4\text{L}_4$  cubane complexes at similar  $\epsilon$  values.<sup>27</sup> The highest energy absorption is assigned to a charge-transfer transition between Co and  $\mu_3\text{-O}$  ligands, while the band at ~650 nm is attributed to a ligand field  $^1\text{A}_1 \longrightarrow ^1\text{T}_1$  or  $^1\text{A}_1 \longrightarrow ^1\text{T}_2$  transition for the  $\text{Co}^{\text{III}}$  centers.<sup>27</sup> Bands at 400 and 480 nm may be associated with charge-transfer transitions between  $d\pi(\text{Ru})$  and  $p\pi(\mu_3\text{-O})$  orbitals. Additionally, a very weak absorption at ~1000 nm is tentatively assigned to a CT transition within the cluster. The assignment of this CT band is discussed in the computational section.

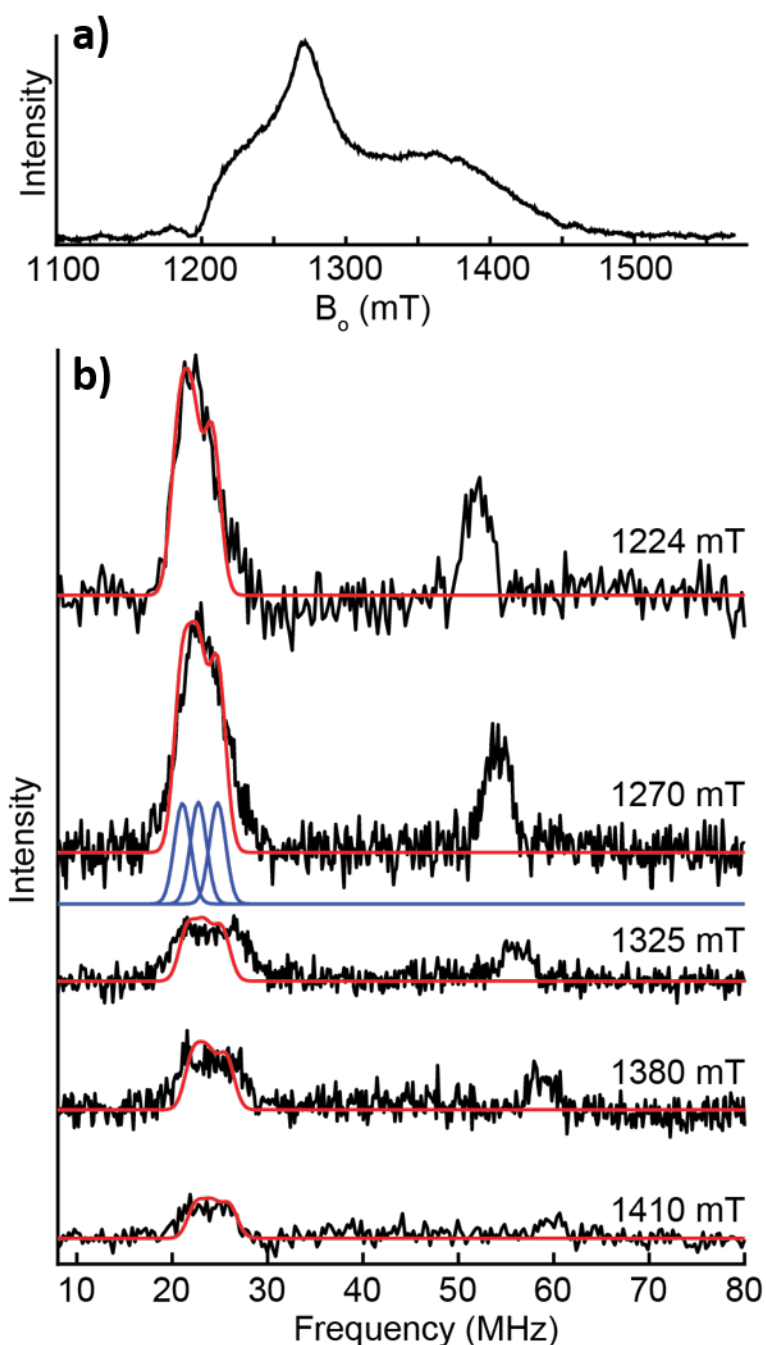

**Figure S9. a)** Q-Band (34.1 GHz) two-pulse electron spin echo field swept (2PFS) spectrum of **1a**. **b)** Field dependent Q-band Davies ENDOR of **1a** collected at the following field positions: 1224, 1270, 1325, 1380, and 1410 mT. The data in black is simulated in red using three isotropic hyperfine values of 17, 20, and 24 MHz. These hyperfine couplings are similar to those observed in the  $\text{MnCo}_3(\mu_3\text{-O})_4(\text{OAc})_5(\text{py})_3$  cubane previously described.<sup>28</sup> The additional feature that moves to higher frequency with increasing field (at 54 MHz at 1270 mT) is assigned to weak contributions from nearby protons. All ENDOR spectra have been normalized to the number of scans, the variation of intensity at each field position is reflected by the overall echo intensity, seen in the top panel.

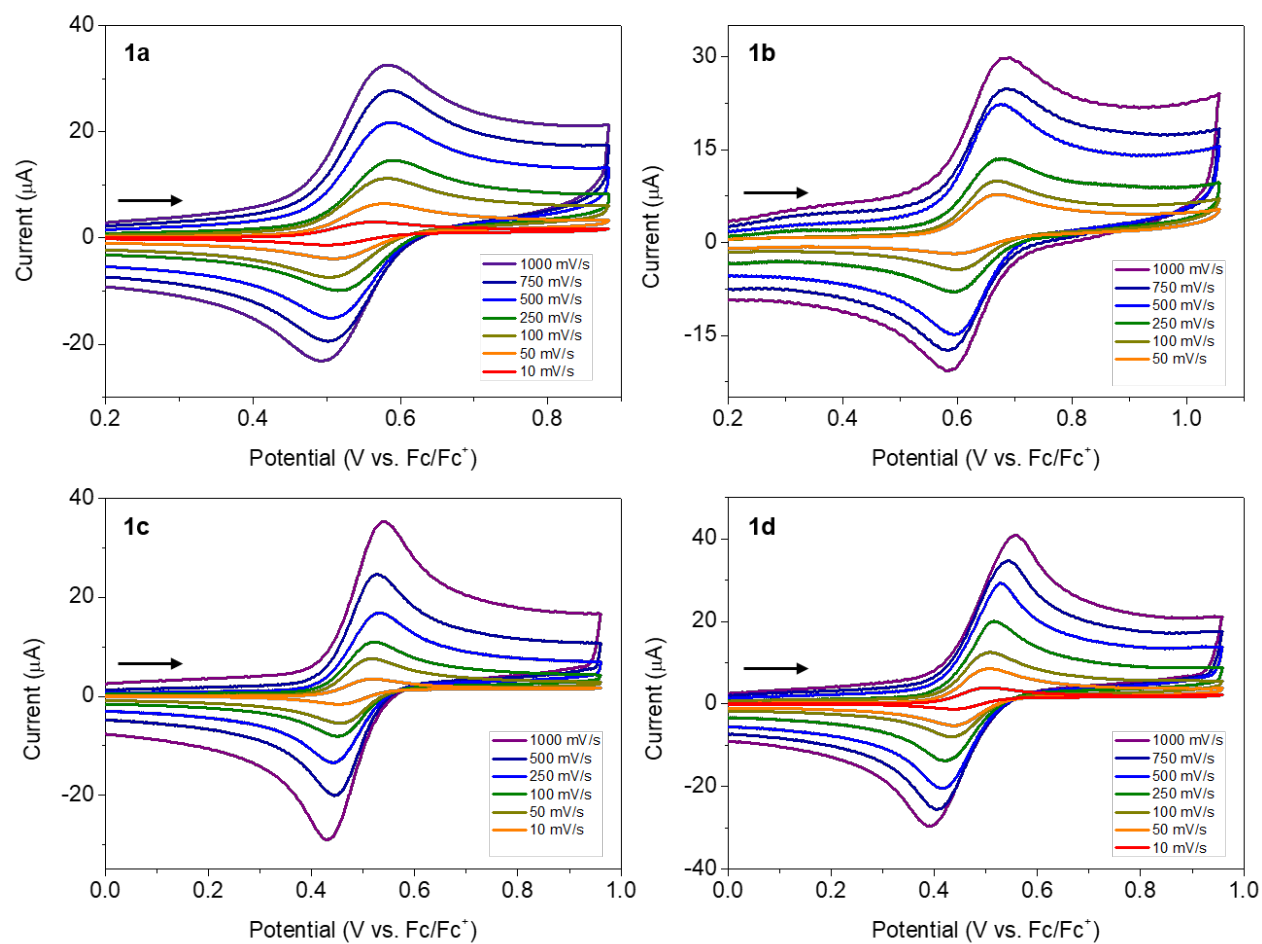

**Figure S10.** Cyclic voltammograms recorded at multiple scan rates of **1a–d** (1.0 mM) in *ortho*-difluorobenzene with  $[\text{nBu}_4\text{N}][\text{PF}_6]$  (0.1 M) as a supporting electrolyte. The arrows indicate the scanning direction.



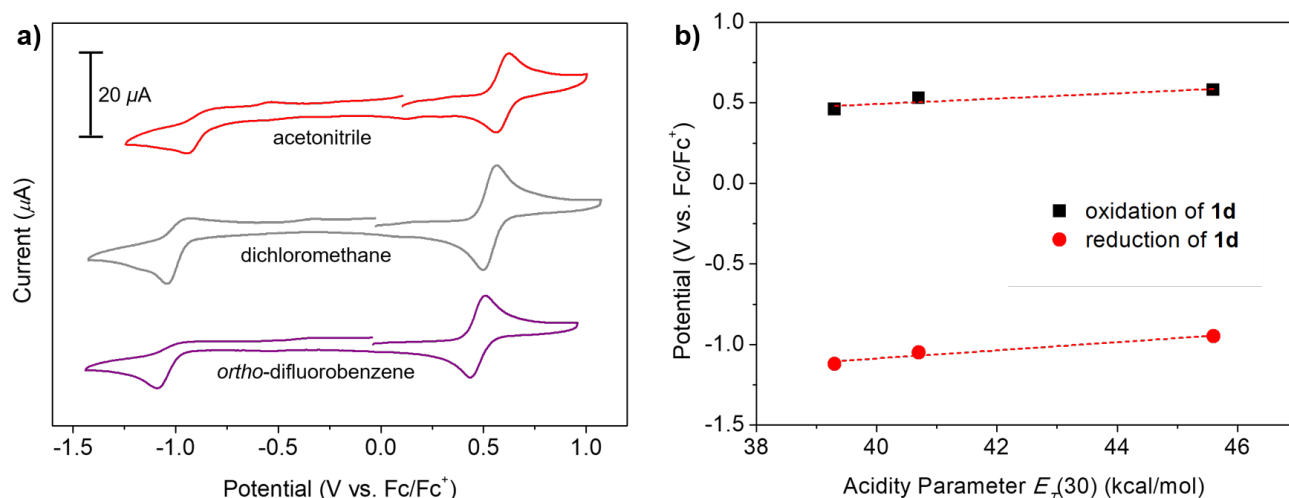

**Figure S11. a)** Cyclic voltammograms of **1d** in *ortho*-difluorobenzene (purple), dichloromethane (grey), and acetonitrile (red) ( $\nu = 100$  mV/s, 0.1 M [ $n$ Bu<sub>4</sub>N]PF<sub>6</sub> electrolyte). Oxidation potentials are 0.46, 0.53, and 0.58 V vs. Fc/Fc<sup>+</sup> and reduction potentials are –1.12, –1.05, and –0.95 V vs. Fc/Fc<sup>+</sup> for *ortho*-difluorobenzene, dichloromethane, and acetonitrile, respectively. **b)** Plot of redox potentials of **1d** vs. Dimroth-Reichardt parameter  $E_T(30)$  (kcal/mol) of solvents<sup>29</sup> with linear regression ( $R^2 = 0.8438$  for oxidation and  $R^2 = 0.9570$  for reduction). Among the reported empirical solvent parameters,<sup>30,31</sup> the acidity (electrophilicity) parameter  $E_T(30)$  is the only one that shows a linear relationship with the redox potentials: more electrophilic solvents shift the potentials more positively. This correlation suggests an increase stabilization of the reduced cubane with increasing electrophilicity of the solvent, but an opposite effect for the oxidation. Note that the empirical parameters of fluorobenzene were used for linear regression analyses when there are no reports for *ortho*-difluorobenzene.

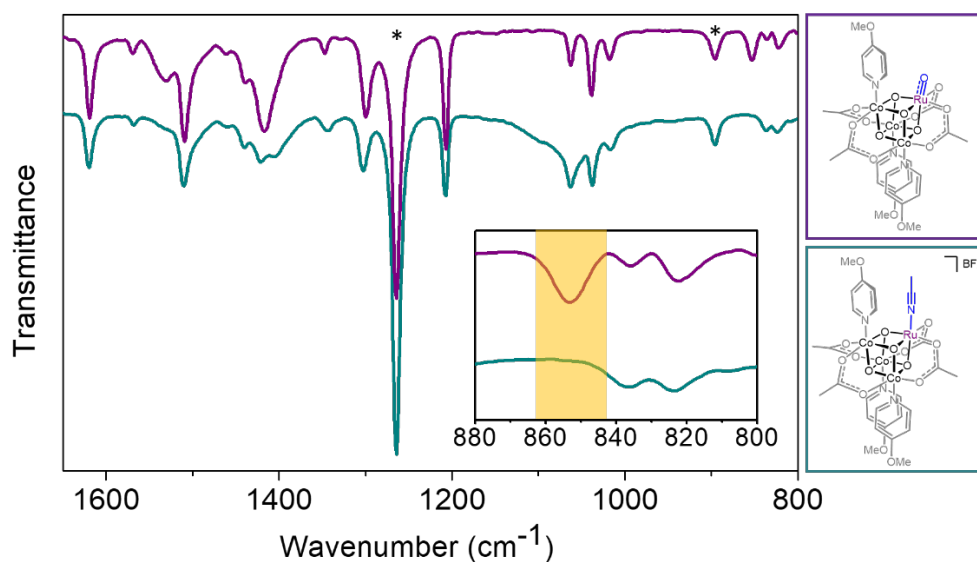

**Figure S12.** Solution-state IR spectra of compound **1d** (purple) vs. **2-MeCN** (green) in dichloromethane. The inset indicates the absence of the 853 cm<sup>–1</sup> band ( $\nu_{Ru-O}$ ) in the spectrum of **2-MeCN** (highlighted in yellow). The asterisks (\*) indicate vibrational wavenumbers associated with dichloromethane.

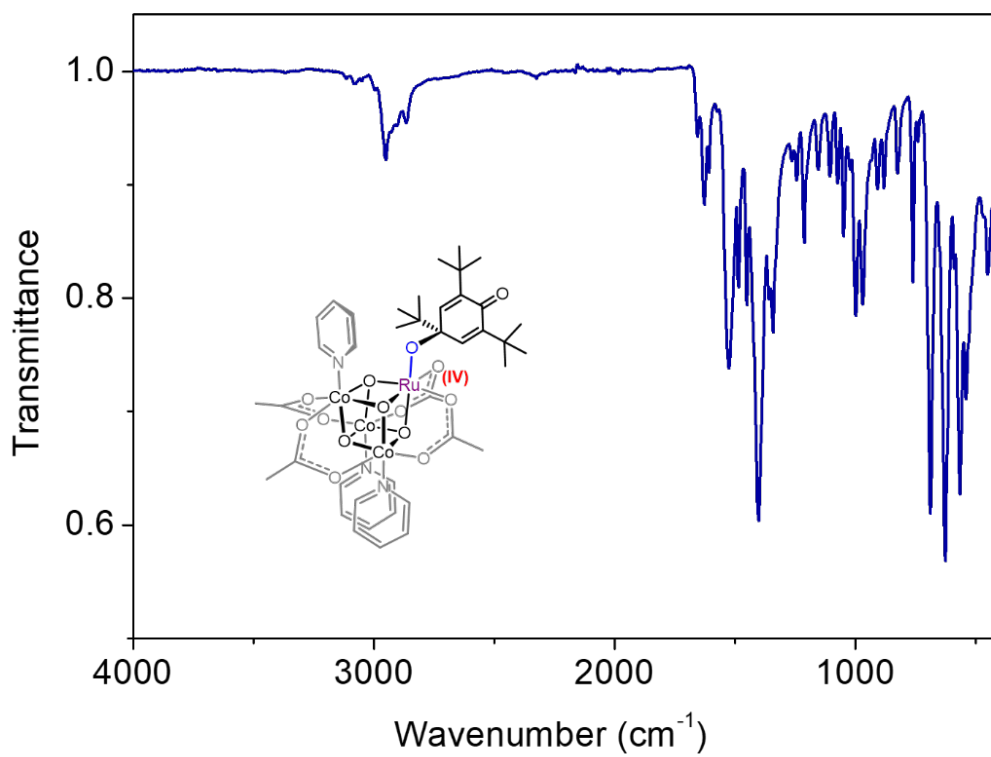

**Figure S13.** Solid-state IR spectrum of compound **3**.

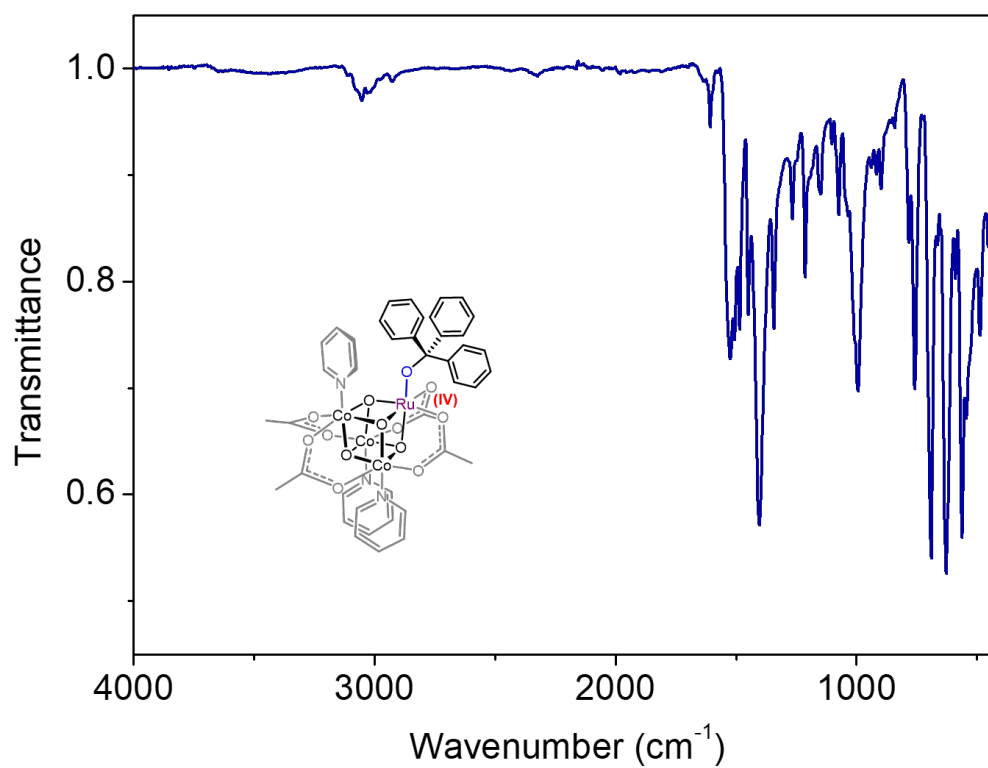

**Figure S14.** Solid-state IR spectrum of compound **4**.

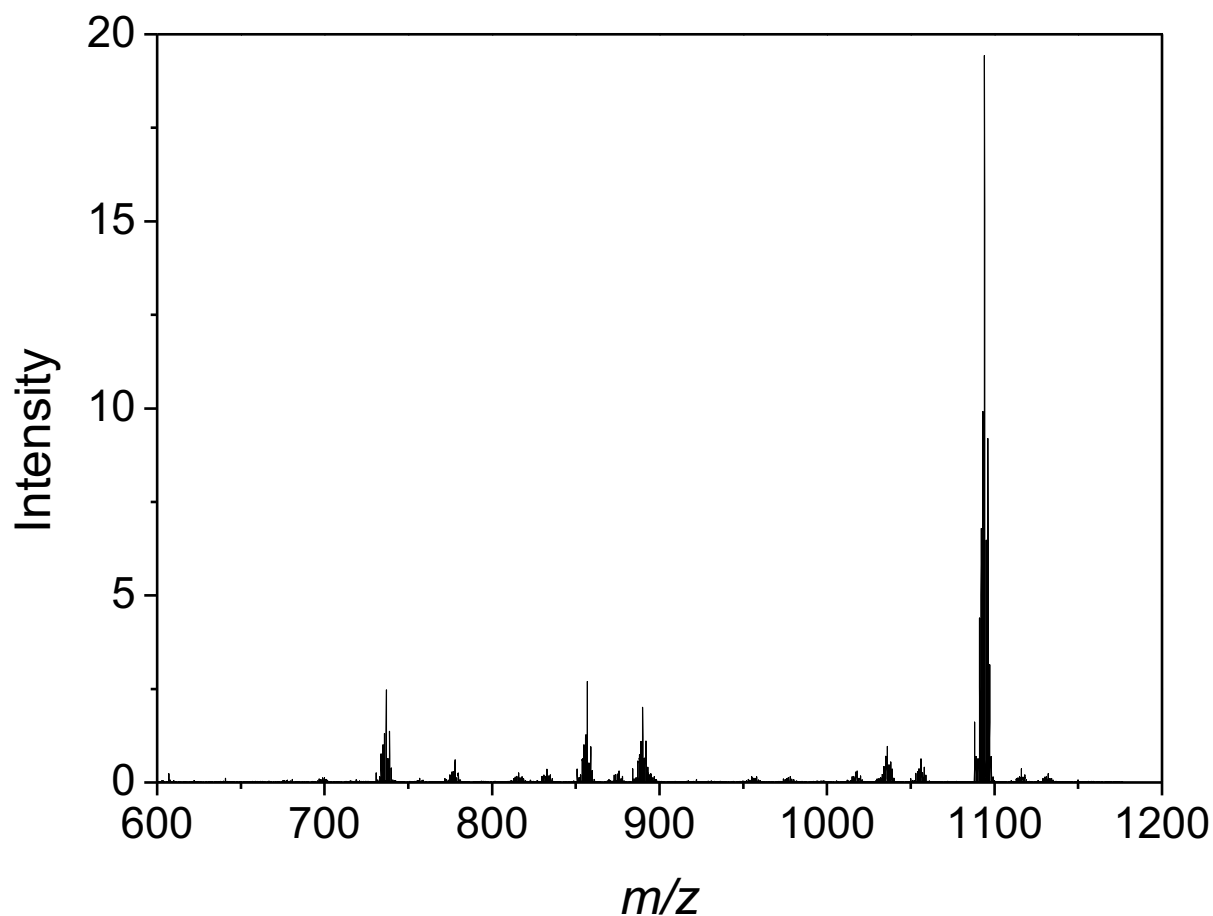

**Figure S15.** ESI Spectrum of the reaction mixture between **1a** and 2,4,6-tri-*tert*-butylphenol. An aliquot was taken from the reaction mixture and diluted with acetonitrile for ESI measurement.

**Table S1.** Major products from the reaction of compound **1a** and 2,4,6-tri-*tert*-butylphenol identified by HR-ESI-MS in acetonitrile

| Found $m/z$ | Theoretical $m/z$ | Assignment                                                                                                                                    |
|-------------|-------------------|-----------------------------------------------------------------------------------------------------------------------------------------------|
| 1094.0961   | 1094.0879         | $[\text{Ru}(\text{OC}_{18}\text{H}_{29}\text{O})\text{Co}_3(\mu_3\text{-O})_4(\text{OAc})_4(\text{py})_3]\cdot\text{H}^+$ , compound <b>3</b> |
| 895.9534    | 895.9134          | $[\text{Ru}(\text{py})\text{Co}_3(\mu_3\text{-O})_4(\text{OAc})_4(\text{py})_3]\cdot\text{H}^+$                                               |
| 857.8990    | 857.8978          | $[\text{Ru}(\text{MeCN})\text{Co}_3(\mu_3\text{-O})_4(\text{OAc})_4(\text{py})_3]\cdot\text{H}^+$                                             |
| 736.8242    | 737.8290          | $[\text{RuCo}_3(\mu_3\text{-O})_4(\text{OAc})_4(\text{py})_2]\cdot\text{H}^+$                                                                 |

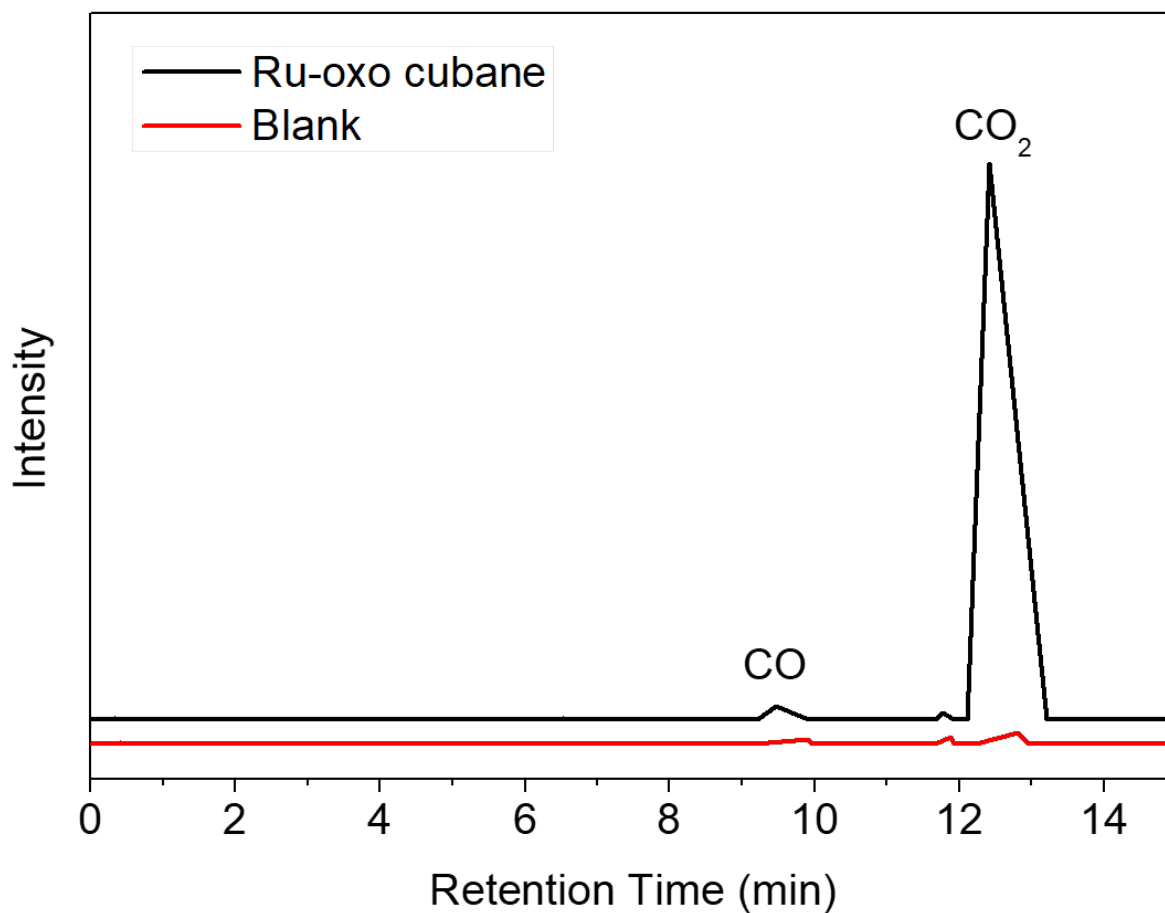

**Figure S16.** GC traces (FID channel) show an exclusive formation of CO<sub>2</sub> from the reaction of **1a** with degassed water after 1 h (black). The blank sample (red) contained only degassed water. The measurements were made under an inert atmosphere of argon.

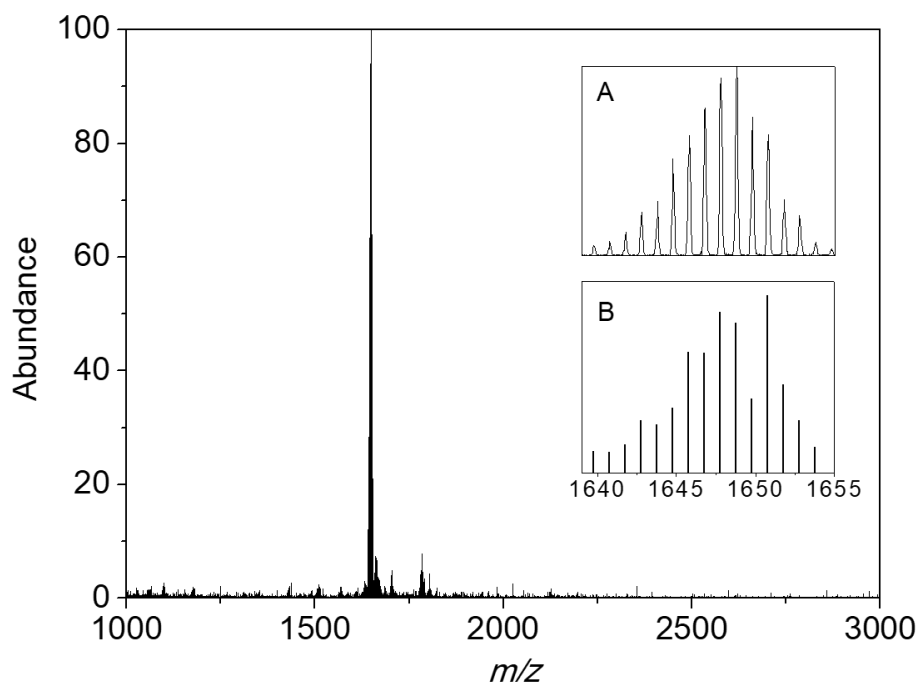

**Figure S17.** ESI spectrum of compound **5** in acetonitrile (inset: A is the enlarged spectrum of  $[(py)_3(OAc)_4Co_3(\mu_3-O)_4Ru]-O-[RuCo_3(\mu_3-O)_4(OAc)_4(py)_3]\cdot H^+$  ion and B is the simulated spectrum).

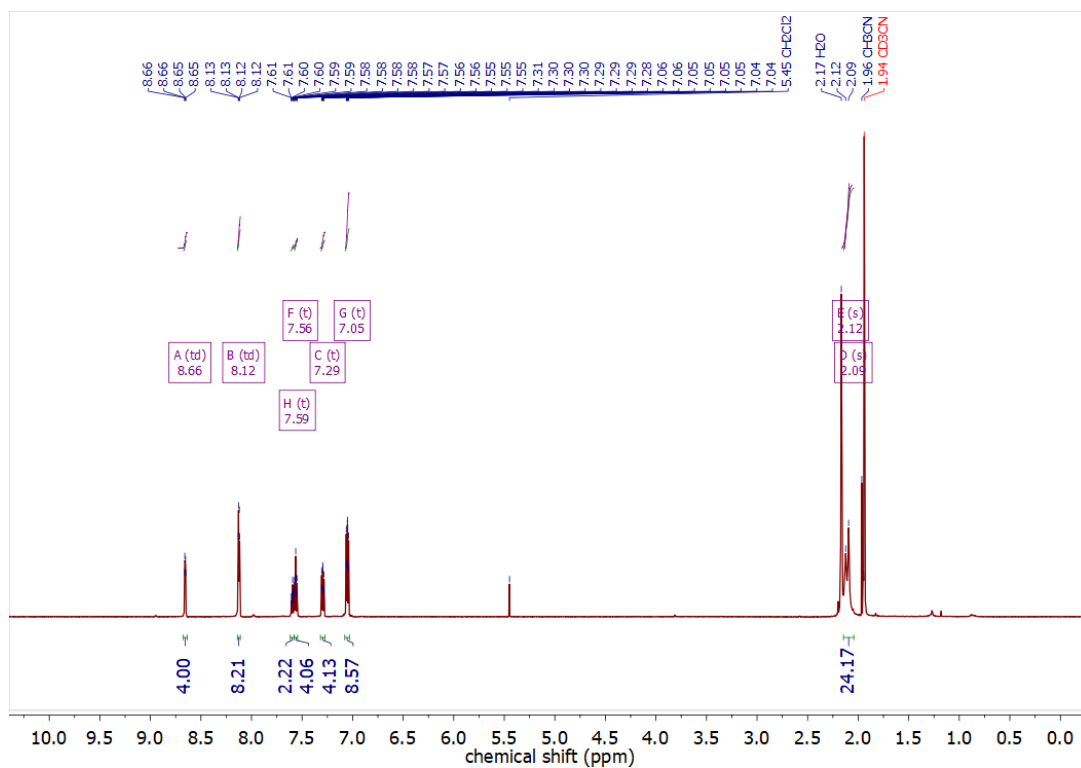

**Figure S18.**  $^1H$  NMR spectrum of compound **5** in  $CD_3CN$ .

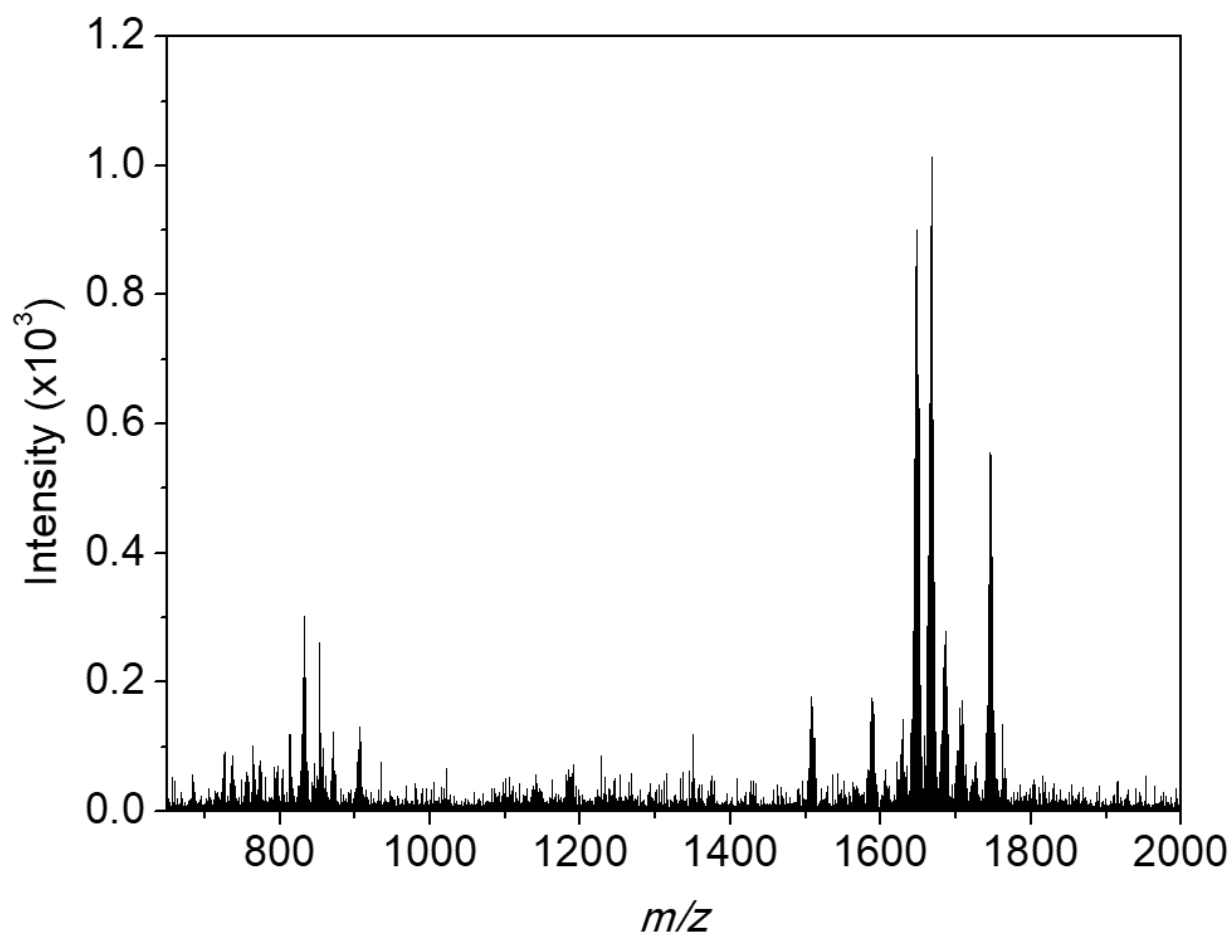

**Figure S19.** ESI spectrum of reaction mixture between compound **1a** and water. After 1 h of stirring, the volatile materials were removed, and the residue was dissolved in acetonitrile for ESI measurement.

**Table S2.** Major products from reaction of compound **1a** and water identified by HR-ESI-MS in acetonitrile

| Found $m/z$ | Theoretical $m/z$ | Assignment                                                                                                                                                                           |
|-------------|-------------------|--------------------------------------------------------------------------------------------------------------------------------------------------------------------------------------|
| 1746.7911   | 1746.7901         | $[\text{RuCo}_3(\mu_3\text{-O})_4(\text{OAc})_4(\text{py})_3 + \text{Ru}(\text{py})\text{Co}_3(\mu_3\text{-O})_4(\text{OAc})_4(\text{py})_3 + (\text{H}_2\text{O})_2]^+$             |
| 1667.7493   | 1667.7479         | $[[\text{RuCo}_3(\mu_3\text{-O})_4(\text{OAc})_4(\text{py})_3]_2 + (\text{H}_2\text{O})_2]^+$                                                                                        |
| 1648.7354   | 1648.7295         | $[(\text{py})_3(\text{OAc})_4\text{Co}_3(\mu_3\text{-O})_4\text{Ru}] - \text{O} - [\text{RuCo}_3(\mu_3\text{-O})_4(\text{OAc})_4(\text{py})_3] \cdot \text{H}^+$ , compound <b>5</b> |
| 852.9490    | 852.94229         | $[\text{Co}_4(\mu_3\text{-O})_4(\text{OAc})_4(\text{py})_4] \cdot \text{H}^+$                                                                                                        |
| 832.8531    | 832.86615         | $[\text{Ru}(\text{O})\text{Co}_3(\mu_3\text{-O})_4(\text{OAc})_4(\text{py})_3] \cdot \text{H}^+$ , compound <b>1a</b>                                                                |

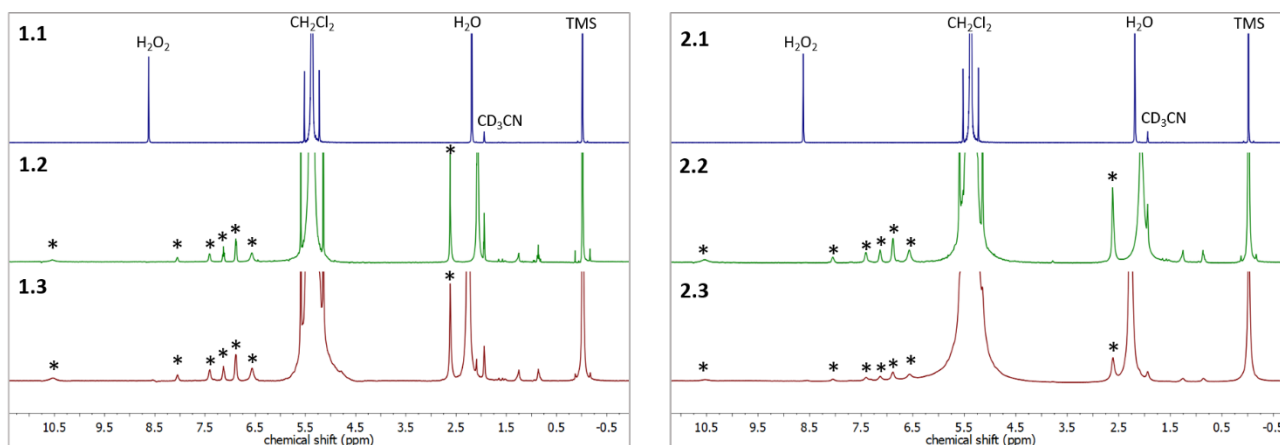

**Figure S20.**  $^1\text{H}$  NMR spectra acquired at ambient temperature monitoring the reaction between **1a** and water (**1.1–1.3**) and the reaction between **1a** and  $\text{H}_2\text{O}_2$  (**2.1–2.3**). All normalized to an internal standard, tetramethylsilane (TMS). Spectra **1.1** and **2.1** serve as a reference for expected chemical shifts. The asterisks (\*) indicate resonances of compound **1a**.

**Table S3.** Observations of the reaction between **1a** and water

| Spectrum   | Stoichiometry and content                                                                                                                                                                                             | Details                                                                          |
|------------|-----------------------------------------------------------------------------------------------------------------------------------------------------------------------------------------------------------------------|----------------------------------------------------------------------------------|
| <b>1.1</b> | $\text{H}_2\text{O}_2$ solution in $\text{H}_2\text{O}$ (5 $\mu\text{L}$ , 90 $\mu\text{mol}$ $\text{H}_2\text{O}_2$ ) + $\text{CH}_2\text{Cl}_2$ (0.3 mL) + $\text{CD}_3\text{CN}$ (0.2 mL) + TMS (5 $\mu\text{L}$ ) | $\text{H}_2\text{O}_2$ resonance observed at 8.62 ppm                            |
| <b>1.2</b> | <b>1a</b> (6 mg, 7.2 $\mu\text{mol}$ ) + $\text{H}_2\text{O}$ (3.2 $\mu\text{L}$ ) + $\text{CH}_2\text{Cl}_2$ (0.3 mL) + $\text{CD}_3\text{CN}$ (0.2 mL) + TMS (5 $\mu\text{L}$ )                                     | No $\text{H}_2\text{O}_2$ observed and decomposition of <b>1a</b> ( $\leq 5\%$ ) |
| <b>1.3</b> | <b>1a</b> (6 mg, 7.2 $\mu\text{mol}$ ) + $\text{H}_2\text{O}$ (8.2 $\mu\text{L}$ ) + $\text{CH}_2\text{Cl}_2$ (0.3 mL) + $\text{CD}_3\text{CN}$ (0.2 mL) + TMS (5 $\mu\text{L}$ )                                     | No $\text{H}_2\text{O}_2$ observed and decomposition of <b>1a</b> ( $\leq 5\%$ ) |

**Table S4.** Observations of the reaction between **1a** and  $\text{H}_2\text{O}_2$

| Spectrum   | Stoichiometry and content                                                                                                                                                                                                                                          | Details                                                                                                                                            |
|------------|--------------------------------------------------------------------------------------------------------------------------------------------------------------------------------------------------------------------------------------------------------------------|----------------------------------------------------------------------------------------------------------------------------------------------------|
| <b>2.1</b> | $\text{H}_2\text{O}_2$ solution in $\text{H}_2\text{O}$ (5 $\mu\text{L}$ , 90 $\mu\text{mol}$ $\text{H}_2\text{O}_2$ ) + $\text{CH}_2\text{Cl}_2$ (0.3 mL) + $\text{CD}_3\text{CN}$ (0.2 mL) + TMS (5 $\mu\text{L}$ )                                              | $\text{H}_2\text{O}_2$ resonance observed at 8.62 ppm                                                                                              |
| <b>2.2</b> | <b>1a</b> (6 mg, 7.2 $\mu\text{mol}$ ) + $\text{H}_2\text{O}_2$ solution in $\text{H}_2\text{O}$ (3.2 $\mu\text{L}$ , 57.6 $\mu\text{mol}$ $\text{H}_2\text{O}_2$ ) + $\text{CH}_2\text{Cl}_2$ (0.3 mL) + $\text{CD}_3\text{CN}$ (0.2 mL) + TMS (5 $\mu\text{L}$ ) | Rapid consumption of $\text{H}_2\text{O}_2$ and decomposition of <b>1a</b> ( $\leq 20\%$ )                                                         |
| <b>2.3</b> | <b>1a</b> (6 mg, 7.2 $\mu\text{mol}$ ) + $\text{H}_2\text{O}_2$ solution in $\text{H}_2\text{O}$ (8.2 $\mu\text{L}$ , 148 $\mu\text{mol}$ $\text{H}_2\text{O}_2$ ) + $\text{CH}_2\text{Cl}_2$ (0.3 mL) + $\text{CD}_3\text{CN}$ (0.2 mL) + TMS (5 $\mu\text{L}$ )  | $\text{H}_2\text{O}_2$ was rapidly consumed along with rapid gas evolution and decomposition of <b>1a</b> (peak broadening impeded quantification) |

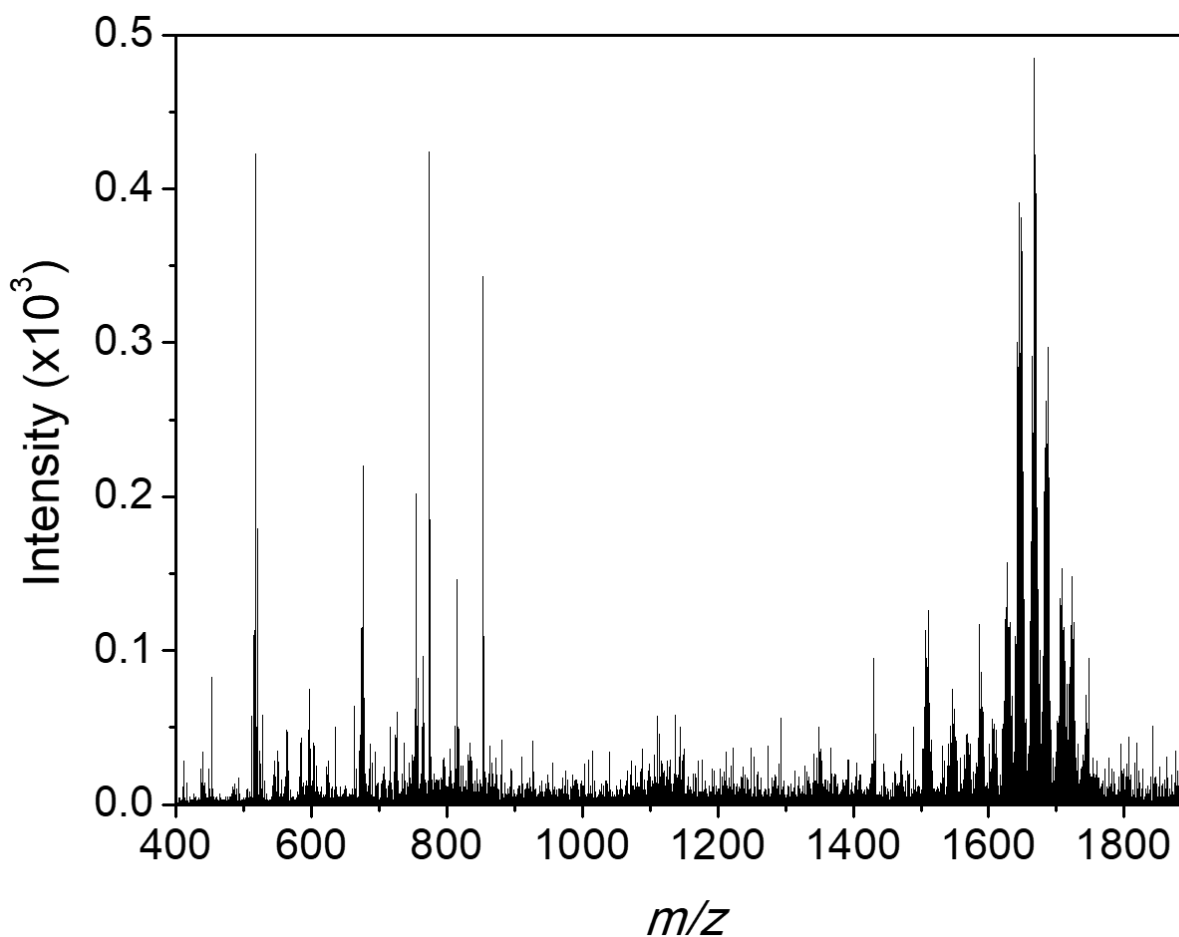

**Figure S21.** ESI spectrum of the reaction mixture of **1a** and H<sub>2</sub>O<sub>2</sub> in acetonitrile. An aliquot was taken from the reaction mixture described in **Table S4** (spectrum **2.3**) and diluted with acetonitrile for ESI measurement.

**Table S5.** Major products from reaction of **1a** and H<sub>2</sub>O<sub>2</sub> identified by HR-ESI-MS in acetonitrile.

| Found <i>m/z</i> | Theoretical <i>m/z</i> | Assignment                                                                                                                                                                           |
|------------------|------------------------|--------------------------------------------------------------------------------------------------------------------------------------------------------------------------------------|
| 1685.7860        | 1685.7585              | $[[\text{RuCo}_3(\mu_3\text{-O})_4(\text{OAc})_4(\text{py})_3]_2 + (\text{H}_2\text{O})_3]^+$                                                                                        |
| 1667.7622        | 1667.7479              | $[[\text{RuCo}_3(\mu_3\text{-O})_4(\text{OAc})_4(\text{py})_3]_2 + (\text{H}_2\text{O})_2]^+$                                                                                        |
| 1648.6907        | 1648.7295              | $[(\text{py})_3(\text{OAc})_4\text{Co}_3(\mu_3\text{-O})_4\text{Ru}] - \text{O} - [\text{RuCo}_3(\mu_3\text{-O})_4(\text{OAc})_4(\text{py})_3] \cdot \text{H}^+$ , compound <b>5</b> |
| 852.9465         | 852.9423               | $[\text{Co}_4(\mu_3\text{-O})_4(\text{OAc})_4(\text{py})_4] \cdot \text{H}^+$                                                                                                        |
| 733.9048         | 773.9001               | $[\text{Co}_4(\mu_3\text{-O})_4(\text{OAc})_4(\text{py})_3] \cdot \text{H}^+$                                                                                                        |
| 675.9441         | 675.9352               | $[\text{Ru}(\text{O})\text{Co}_2(\mu_3\text{-O})_4(\text{OAc})(\text{py})_4] \cdot \text{H}^+$                                                                                       |
| 517.8535         | 517.8508               | $[\text{Ru}(\text{O})\text{Co}_2(\mu_3\text{-O})_4(\text{OAc})(\text{py})_2] \cdot \text{H}^+$                                                                                       |



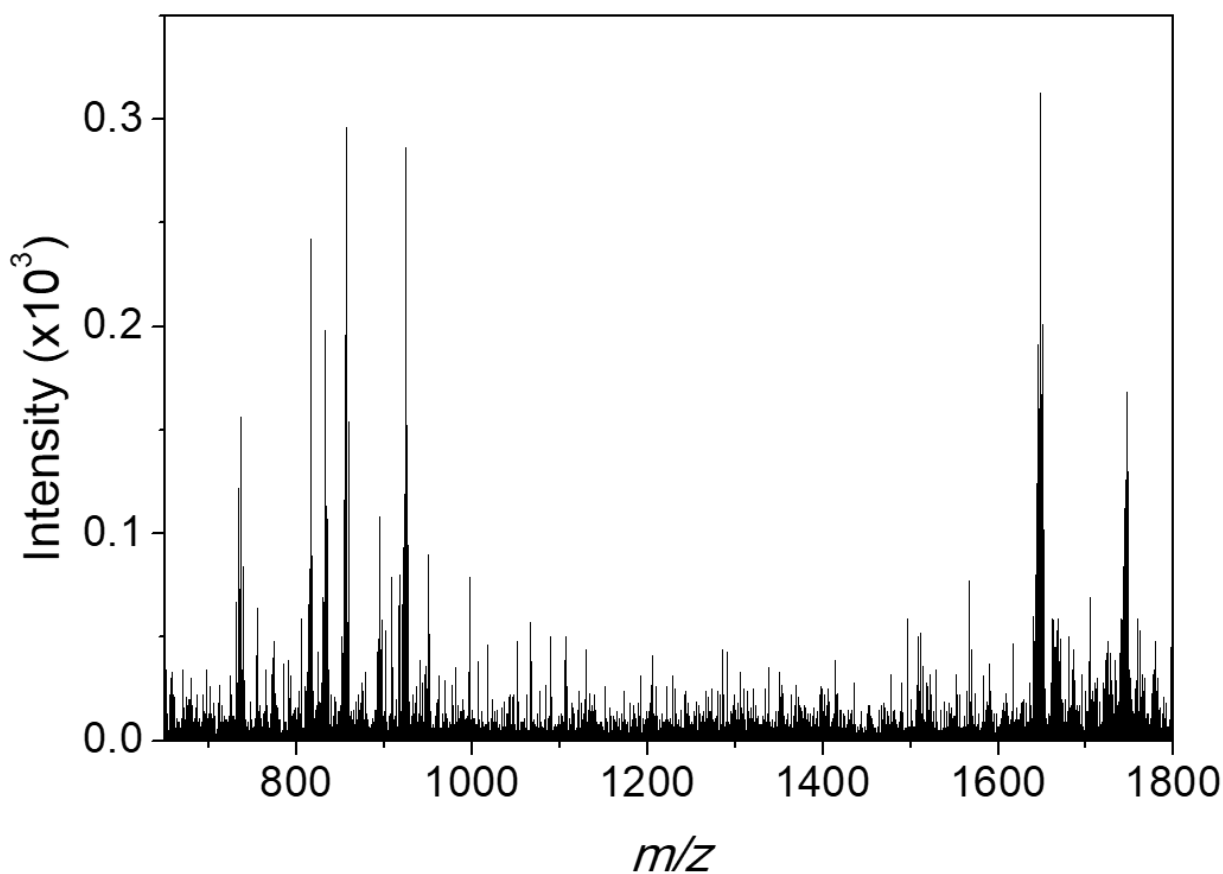

**Figure**

**S22.** ESI spectrum of reaction mixture between compound **1a** and benzyl alcohol in acetonitrile. An aliquot was taken from the reaction mixture and diluted with acetonitrile for ESI measurement.

**Table S6.** Products from reaction of compound **1a** and benzyl alcohol identified by HR-ESI-MS in acetonitrile

| Found $m/z$ | Theoretical $m/z$ | Assignment                                                                                                                                                                     |
|-------------|-------------------|--------------------------------------------------------------------------------------------------------------------------------------------------------------------------------|
| 1746.6112   | 1746.7901         | $[\text{RuCo}_3(\mu_3\text{-O})_4(\text{OAc})_4(\text{py})_3 + \text{Ru}(\text{py})\text{Co}_3(\mu_3\text{-O})_4(\text{OAc})_4(\text{py})_3 + (\text{H}_2\text{O})_2]^+$       |
| 1648.5445   | 1648.7295         | $[(\text{py})_3(\text{OAc})_4\text{Co}_3(\mu_3\text{-O})_4\text{Ru}]\text{-O-}[\text{RuCo}_3(\mu_3\text{-O})_4(\text{OAc})_4(\text{py})_3]\cdot\text{H}^+$ , compound <b>5</b> |
| 922.8149    | 922.9131          | $[\text{RuCo}_3(\mu_3\text{-O})_4(\text{OAc})_4(\text{py})_3 + \text{C}_7\text{H}_6\text{O}]\cdot\text{H}^+$                                                                   |
| 857.7869    | 857.8978          | $[\text{Ru}(\text{MeCN})\text{Co}_3(\mu_3\text{-O})_4(\text{OAc})_4(\text{py})_3]\cdot\text{H}^+$                                                                              |
| 832.7860    | 832.8662          | $[\text{Ru}(\text{O})\text{Co}_3(\mu_3\text{-O})_4(\text{OAc})_4(\text{py})_3(\text{H})]^+$ , compound <b>1a</b>                                                               |
| 816.7887    | 816.8712          | $[\text{RuCo}_3(\mu_3\text{-O})_4(\text{OAc})_4(\text{py})_3]\cdot\text{H}^+$                                                                                                  |
| 737.7300    | 737.8290          | $[\text{RuCo}_3(\mu_3\text{-O})_4(\text{OAc})_4(\text{py})_2]\cdot\text{H}^+$                                                                                                  |

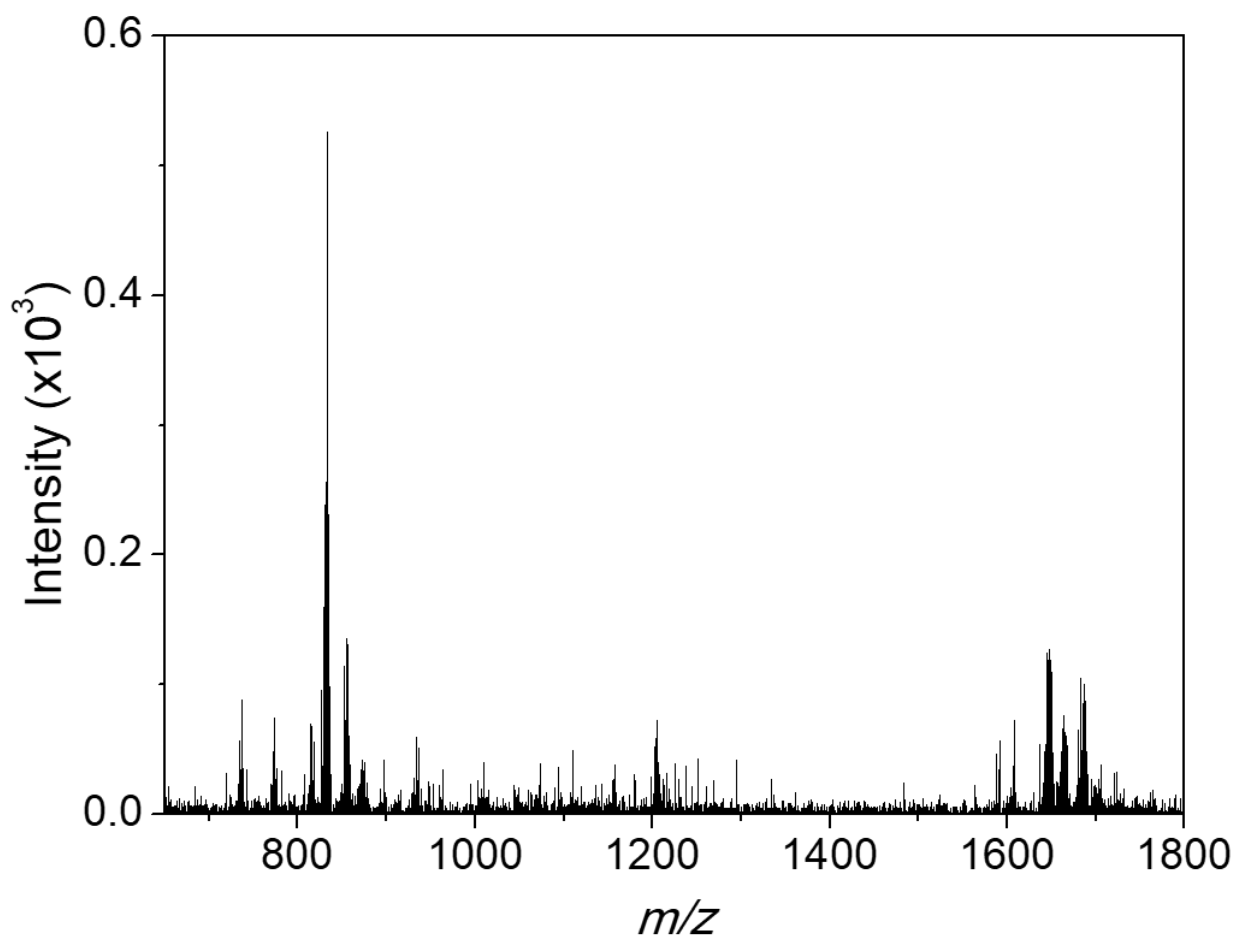

**Figure**

**S23.** ESI spectrum of reaction mixture between compound **1a** and isopropyl alcohol in acetonitrile. An aliquot was taken from the reaction mixture and diluted with acetonitrile for ESI measurement.

**Table S7.** Products from reaction of compound **1a** and isopropyl alcohol identified by HR-ESI-MS in acetonitrile

| Found $m/z$ | Theoretical $m/z$ | Assignment                                                                                         |
|-------------|-------------------|----------------------------------------------------------------------------------------------------|
| 1648.5568   | 1648.7295         | $[(py)_3(OAc)_4Co_3(\mu_3-O)_4Ru]-O-[RuCo_3(\mu_3-O)_4(OAc)_4(py)_3]\cdot H^+$ , compound <b>5</b> |
| 854.7380    | 854.8481          | $[Ru(O)Co_3(\mu_3-O)_4(OAc)_4(py)_3]\cdot Na^+$ , compound <b>1a</b>                               |
| 832.7776    | 832.8662          | $[Ru(O)Co_3(\mu_3-O)_4(OAc)_4(py)_3]\cdot H^+$ , compound <b>1a</b>                                |

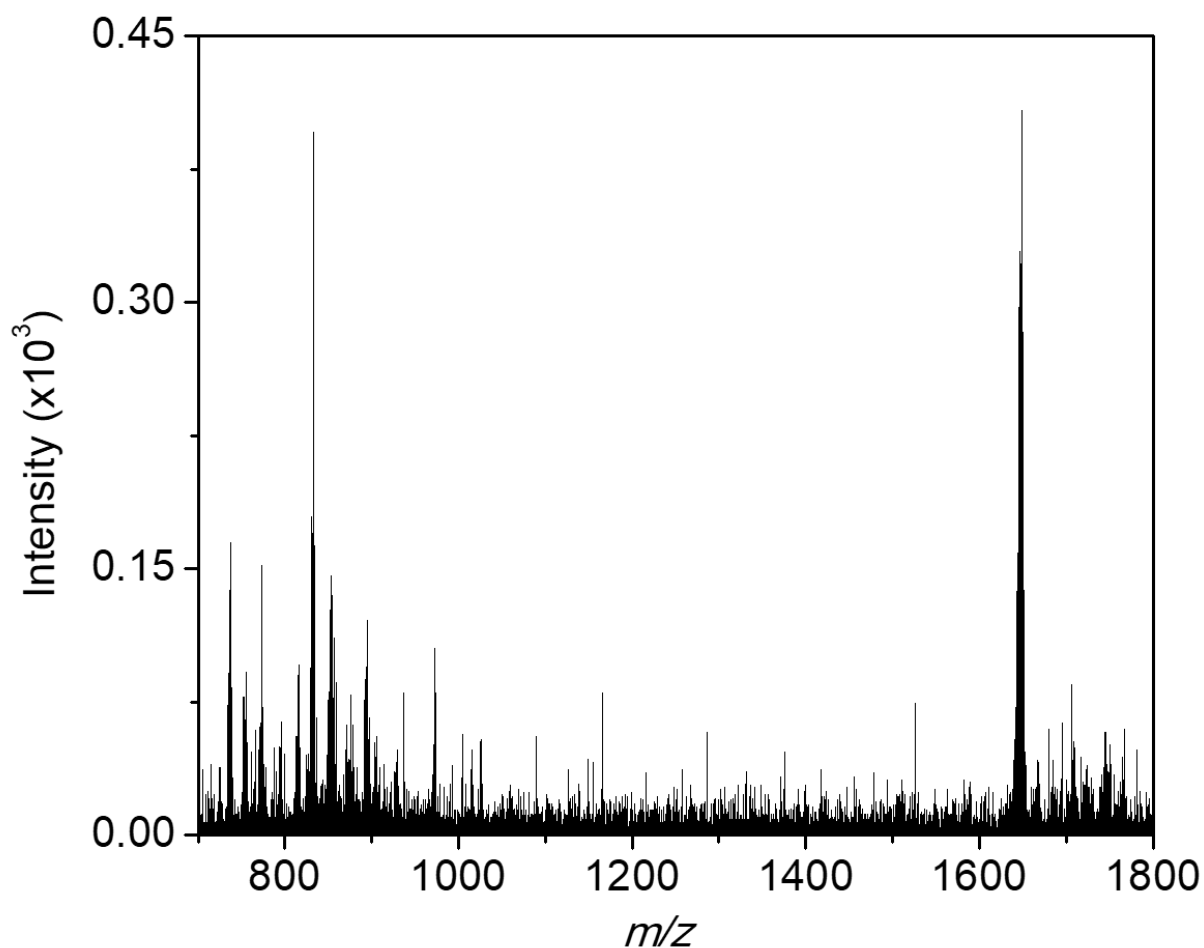

**Figure S24.** ESI spectrum of reaction mixture between compound **1a** and styrene in acetonitrile. An aliquot was taken from the reaction mixture and diluted with acetonitrile for ESI measurement.

**Table S8.** Products from reaction of compound **1a** and styrene identified by HR-ESI-MS in acetonitrile

| Found $m/z$ | Theoretical $m/z$ | Assignment                                                                                         |
|-------------|-------------------|----------------------------------------------------------------------------------------------------|
| 1648.7379   | 1648.7295         | $[(py)_3(OAc)_4Co_3(\mu_3-O)_4Ru]-O-[RuCo_3(\mu_3-O)_4(OAc)_4(py)_3]\cdot H^+$ , compound <b>5</b> |
| 895.9128    | 895.9134          | $[Ru(py)Co_3(\mu_3-O)_4(OAc)_4(py)_3]\cdot H^+$                                                    |
| 854.8638    | 854.8481          | $[Ru(O)Co_3(\mu_3-O)_4(OAc)_4(py)_3]\cdot Na^+$ , compound <b>1a</b>                               |
| 832.8822    | 832.8662          | $[Ru(O)Co_3(\mu_3-O)_4(OAc)_4(py)_3]\cdot H^+$ , compound <b>1a</b>                                |
| 737.8389    | 737.8290          | $[RuCo_3(\mu_3-O)_4(OAc)_4(py)_2]\cdot H^+$                                                        |

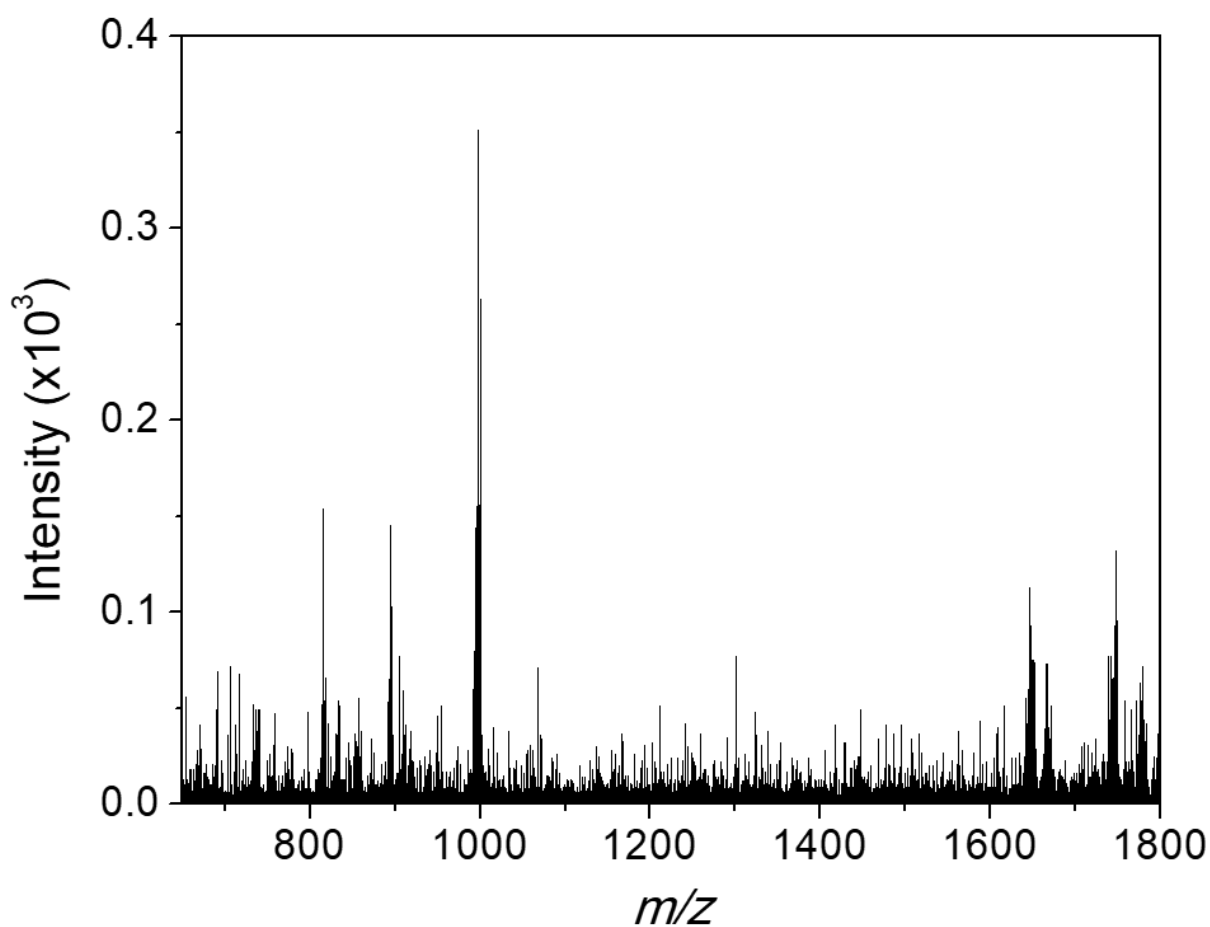

**Figure S25.** ESI spectrum of reaction mixture between compound **1a** and 1,2-diphenylhydrazine in acetonitrile. An aliquot was taken from the reaction mixture and diluted with acetonitrile for ESI measurement.

**Table S9.** Products from reaction of compound **1a** and 1,2-diphenylhydrazine identified by HR-ESI-MS in acetonitrile

| Found $m/z$ | Theoretical $m/z$ | Assignment                                                                                                                                                                     |
|-------------|-------------------|--------------------------------------------------------------------------------------------------------------------------------------------------------------------------------|
| 1746.5958   | 1746.7901         | $[\text{RuCo}_3(\mu_3\text{-O})_4(\text{OAc})_4(\text{py})_3 + \text{Ru}(\text{py})\text{Co}_3(\mu_3\text{-O})_4(\text{OAc})_4(\text{py})_3 + (\text{H}_2\text{O})_2]^+$       |
| 1648.5079   | 1648.7295         | $[(\text{py})_3(\text{OAc})_4\text{Co}_3(\mu_3\text{-O})_4\text{Ru}]\text{-O-}[\text{RuCo}_3(\mu_3\text{-O})_4(\text{OAc})_4(\text{py})_3]\cdot\text{H}^+$ , compound <b>5</b> |
| 998.8025    | 998.9556          | $[\text{RuCo}_3(\mu_3\text{-O})_4(\text{OAc})_4(\text{py})_3 + \text{C}_{12}\text{H}_{10}\text{N}_2]\cdot\text{H}^+$                                                           |
| 895.8786    | 895.9134          | $[\text{Ru}(\text{py})\text{Co}_3(\mu_3\text{-O})_4(\text{OAc})_4(\text{py})_3]\cdot\text{H}^+$                                                                                |
| 816.7877    | 816.8712          | $[\text{RuCo}_3(\mu_3\text{-O})_4(\text{OAc})_4(\text{py})_3]\cdot\text{H}^+$                                                                                                  |

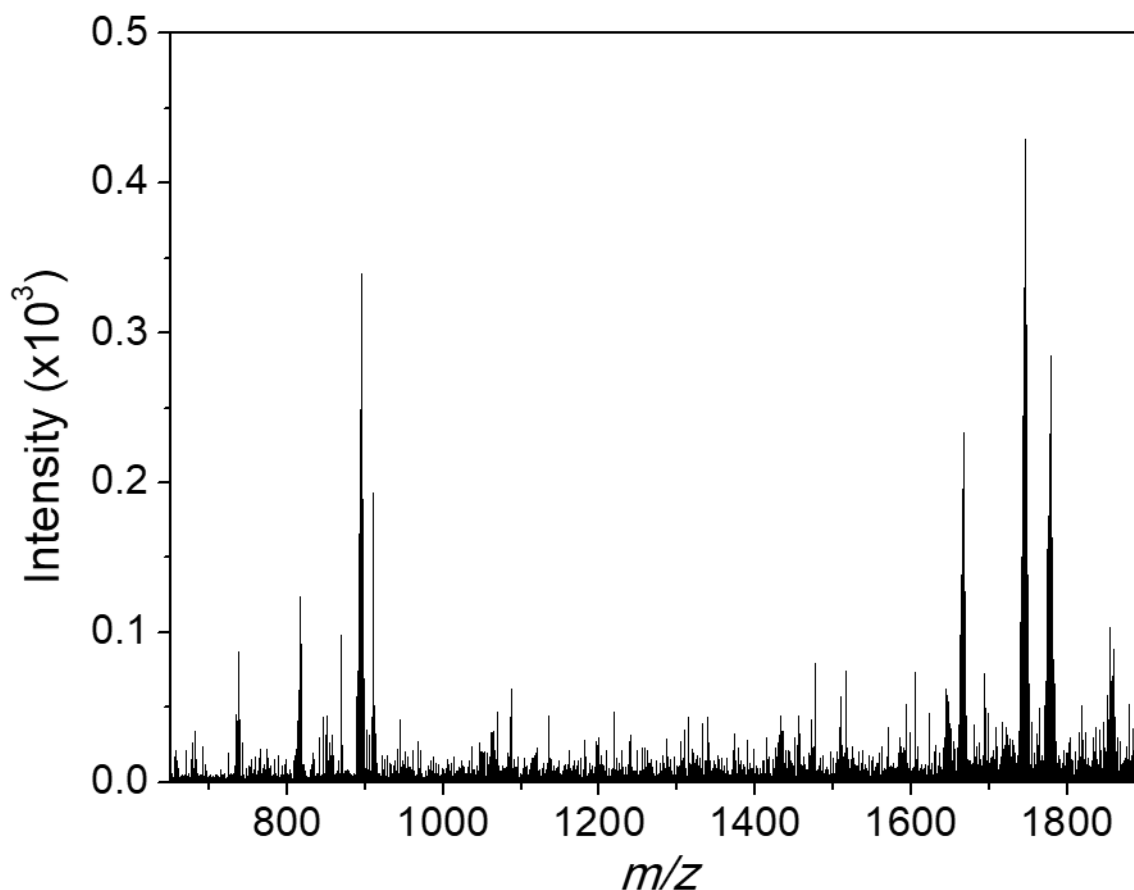

**Figure S26.** ESI spectrum of reaction mixture between compound **1a** and 1,4-cyclohexadiene in acetonitrile. An aliquot was taken from the reaction mixture and diluted with acetonitrile for ESI measurement.

**Table S10.** Products from reaction of compound **1a** and 1,4-cyclohexadiene identified by HR-ESI-MS in acetonitrile

| Found $m/z$ | Theoretical $m/z$ | Assignment                                                                                                                                                                     |
|-------------|-------------------|--------------------------------------------------------------------------------------------------------------------------------------------------------------------------------|
| 1779.3987   | -                 | Unidentifiable highly charged coordination polymer                                                                                                                             |
| 1746.5484   | 1746.7901         | $[\text{RuCo}_3(\mu_3\text{-O})_4(\text{OAc})_4(\text{py})_3 + \text{Ru}(\text{py})\text{Co}_3(\mu_3\text{-O})_4(\text{OAc})_4(\text{py})_3 + (\text{H}_2\text{O})_2]^+$       |
| 1648.5128   | 1648.7295         | $[(\text{py})_3(\text{OAc})_4\text{Co}_3(\mu_3\text{-O})_4\text{Ru}]\text{-O-}[\text{RuCo}_3(\mu_3\text{-O})_4(\text{OAc})_4(\text{py})_3]\cdot\text{H}^+$ , compound <b>5</b> |
| 895.8286    | 895.9134          | $[\text{Ru}(\text{py})\text{Co}_3(\mu_3\text{-O})_4(\text{OAc})_4(\text{py})_3]\cdot\text{H}^+$                                                                                |
| 816.7880    | 816.8712          | $[\text{RuCo}_3(\mu_3\text{-O})_4(\text{OAc})_4(\text{py})_3]\cdot\text{H}^+$                                                                                                  |
| 737.7246    | 737.8290          | $[\text{RuCo}_3(\mu_3\text{-O})_4(\text{OAc})_4(\text{py})_2]\cdot\text{H}^+$                                                                                                  |

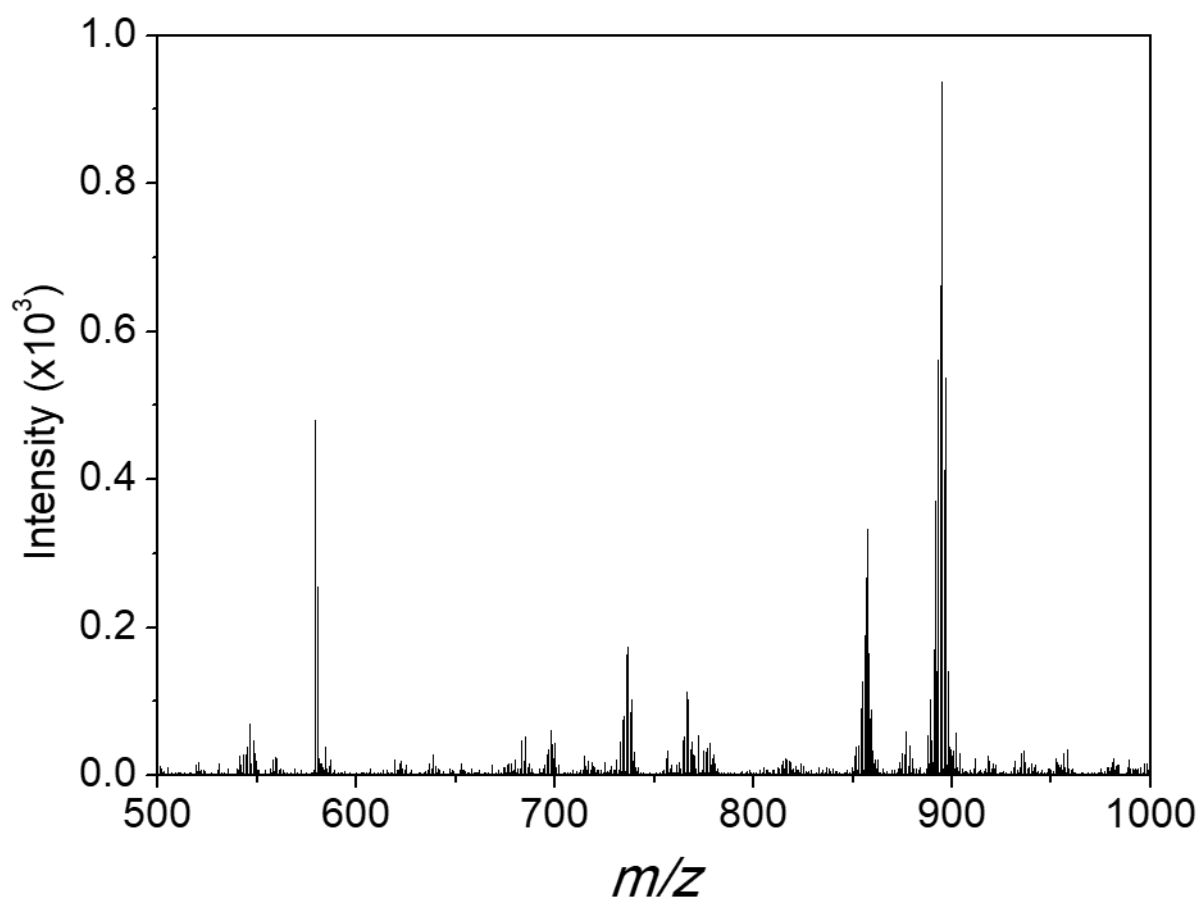

**Figure S27.** ESI spectrum of reaction mixture between compound **1a** and triphenylphosphine in acetonitrile. An aliquot was taken from the reaction mixture and diluted with acetonitrile for ESI measurement.

**Table S11.** Products from reaction of compound **1a** and triphenylphosphine identified by HR-MS-ESI in acetonitrile

| Found $m/z$ | Theoretical $m/z$ | Assignment                                                                                        |
|-------------|-------------------|---------------------------------------------------------------------------------------------------|
| 895.8782    | 895.9134          | $[\text{Ru}(\text{py})\text{Co}_3(\mu_3\text{-O})_4(\text{OAc})_4(\text{py})_3]\cdot\text{H}^+$   |
| 857.8328    | 857.8978          | $[\text{Ru}(\text{MeCN})\text{Co}_3(\mu_3\text{-O})_4(\text{OAc})_4(\text{py})_3]\cdot\text{H}^+$ |
| 737.8080    | 737.8290          | $[\text{RuCo}_3(\mu_3\text{-O})_4(\text{OAc})_4(\text{py})_2]\cdot\text{H}^+$                     |
| 579.1490    | 579.1619          | $[\text{OPPh}_3]\cdot\text{Na}^+$                                                                 |

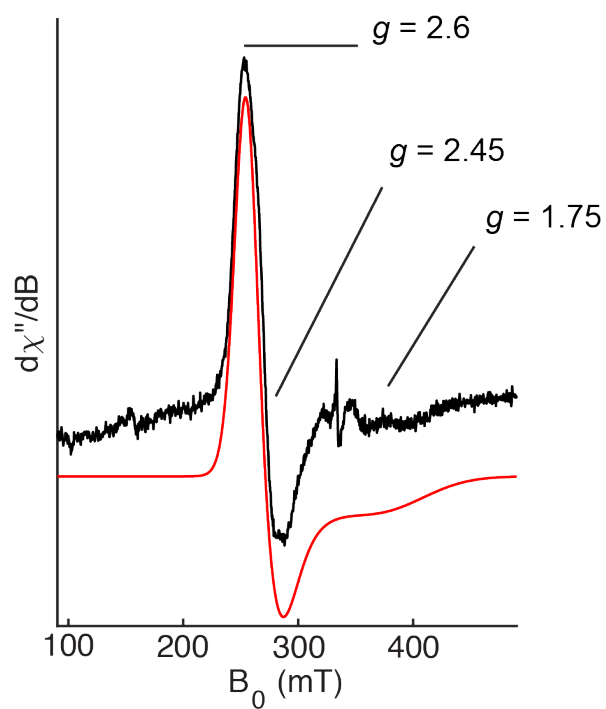

**Figure S28.** CW X-band (9.4 GHz) EPR spectrum (Black) of an aliquot of the product solution of the reaction between **1a** and triphenylphosphine with simulation of the data (Red) using  $g$ -values of [2.60, 2.45, 1.75]. Spectrum was collected at 20K, with 10 mW microwave power, and 5G modulation amplitude.

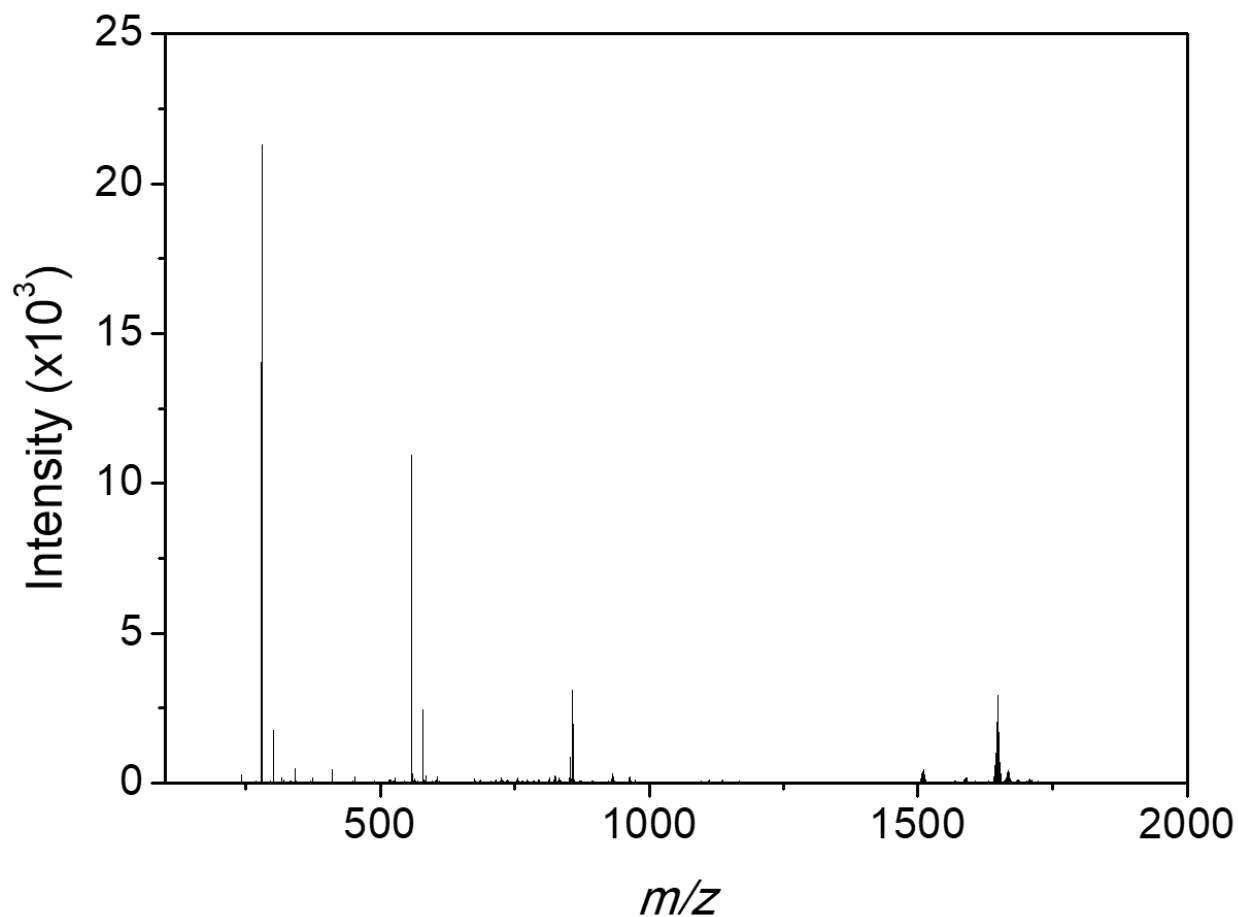

**Figure S29.** ESI spectrum of an aliquot of the product solution from the reaction of compound **1a** and 0.5 equiv of triphenylphosphine in acetonitrile.

**Table S12.** Products from reaction of compound **1a** and 0.5 equiv of triphenylphosphine identified by HR-ESI-MS in acetonitrile.

| Found $m/z$ | Theoretical $m/z$ | Assignment                                                                                                                                                                     |
|-------------|-------------------|--------------------------------------------------------------------------------------------------------------------------------------------------------------------------------|
| 1648.7104   | 1648.7295         | $[(\text{py})_3(\text{OAc})_4\text{Co}_3(\mu_3\text{-O})_4\text{Ru})\text{-O-}[\text{RuCo}_3(\mu_3\text{-O})_4(\text{OAc})_4(\text{py})_3]\cdot\text{H}^+$ , compound <b>5</b> |
| 857.2695    | 857.2479          | $[(\text{OPPh}_3)_3]\cdot\text{Na}^+$                                                                                                                                          |
| 557.1862    | 557.1799          | $[(\text{OPPh}_3)_2]\cdot\text{H}^+$                                                                                                                                           |
| 279.0937    | 279.0939          | $[\text{OPPh}_3]\cdot\text{H}^+$                                                                                                                                               |



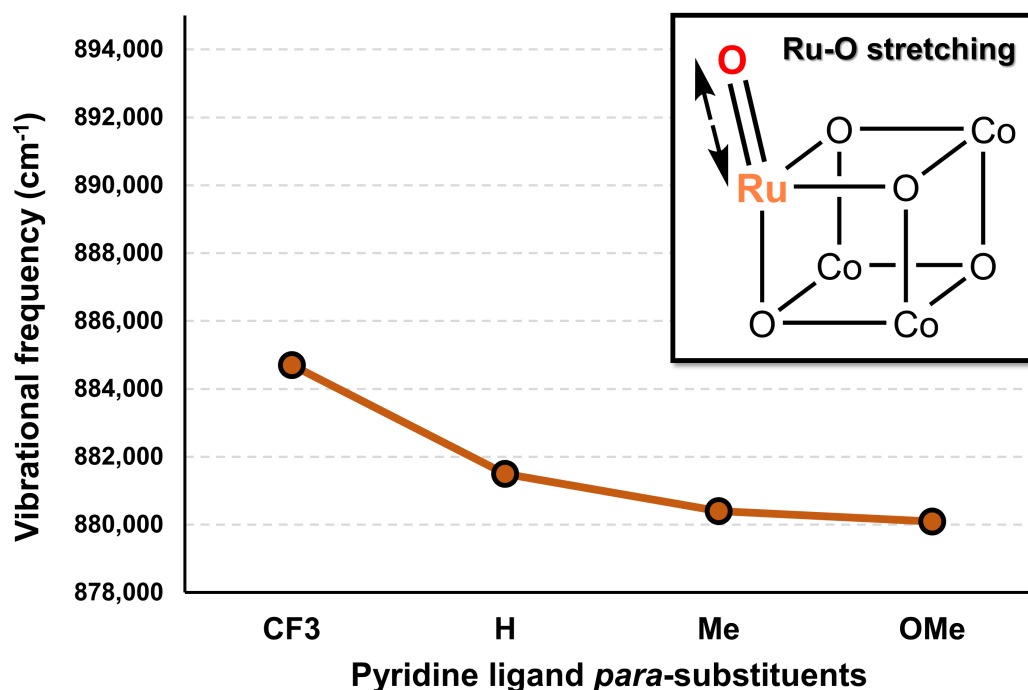

**Figure S30.** Ru<sup>V</sup>–O stretching frequency dependence on the nature of the *para*-substituents of the pyridine ligands

## References

- (1) Moore, P. W.; Read, C. D. G.; Bernhardt, P. V.; Williams, C. M. ATP3 and MTP3: Easily Prepared Stable Perruthenate Salts for Oxidation Applications in Synthesis. *Chem. Eur. J.* **2018**, *24* (18), 4556–4561.
- (2) Boduszek, B.; Shine, H. J. Preparation of Solid Thianthrene Cation Radical Tetrafluoroborate. *J. Org. Chem.* **1988**, *53* (21), 5142–5143.
- (3) Manner, V. W.; Markle, T. F.; Freudenthal, J. H.; Roth, J. P.; Mayer, J. M. The First Crystal Structure of a Monomeric Phenoxyl Radical: 2,4,6-tri-*tert*-Butylphenoxyl Radical. *Chem. Commun.* **2008**, *246* (2), 256–258.
- (4) Heurich, T.; Nesterov, V.; Schnakenburg, G.; Qu, Z. W.; Grimme, S.; Hazin, K.; Gates, D. P.; Engeser, M.; Streubel, R. Strong Evidence of a Phosphanoxyl Complex: Formation, Bonding, and Reactivity of Ligated Phosphorus Analogues of Nitroxides. *Angew. Chemie Int. Ed.* **2016**, *55* (46), 14439–14443.
- (5) Evans, D. F. Paramagnetic Susceptibility, etc. 2003 400. The Determination of the Paramagnetic Susceptibility. *J. Chem. Soc.* **1959**, 2003–2005.
- (6) Flores, M.; Isaacson, R. A.; Calvo, R.; Feher, G.; Lubitz, W. Probing hydrogen bonding to quinone anion radicals by <sup>1</sup>H and <sup>2</sup>H ENDOR spectroscopy at 35 GHz. *Chem. Phys.* **2003**, *294* (3), 401–413.
- (7) Schweiger, A.; Jeschke, G. *Principles of Pulse Electron Paramagnetic Resonance*; Oxford University Press: New York, 2001.
- (8) Bruggemann, W.; Niklas, J. R. Stochastic ENDOR. *J. Magn. Reson. A* **1994**, *108* (1), 25–29.
- (9) Stoll, S.; Schweiger, A. EasySpin, a comprehensive software package for spectral simulation and analysis in EPR. *J. Magn. Reson.* **2006**, *178* (1), 42–55.

- (10) Bruker Analytical X-ray Systems, Inc., SAINT and APEX 2 Software for CCD Diffractometers. Bruker Analytical X-ray Systems, Inc.: Madison, WI, USA 2000.
- (11) Sheldrick, G. M. TWINABS Version 2012/1. University of Gottingen 2012.
- (12) Sheldrick, G. M. SADABS. Bruker Analytical X-ray Systems, Inc. 2014.
- (13) Sheldrick, G. M. SHELXT - Integrated space-group and crystal-structure determination. *Acta Crystallogr. Sect. A Found. Crystallogr.* **2015**, *71* (1), 3–8.
- (14) Sheldrick, G. M. Crystal structure refinement with SHELXL. *Acta Crystallogr. Sect. C Struct. Chem.* **2015**, *71* (Md), 3–8.
- (15) Dolomanov, O. V.; Bourhis, L. J.; Gildea, R. J.; Howard, J. A. K.; Puschmann, H. OLEX2: A complete structure solution, refinement and analysis program. *J. Appl. Crystallogr.* **2009**, *42* (2), 339–341.
- (16) Sheldrick, G. M. CELL NOW V2008/2. Bruker Analytical X-ray Systems, Inc. 2008.
- (17) Tao, J.; Perdew, J. P.; Staroverov, V. N.; Scuseria, G. E. Climbing the density functional ladder: Nonempirical meta-generalized gradient approximation designed for molecules and solids. *Phys. Rev. Lett.* **2003**, *91* (14), 3–6.
- (18) Frisch, M. J.; Trucks, G. W.; Schlegel, H. B.; Scuseria, G. E.; Robb, M. A.; Cheeseman, J. R.; Scalmani, G.; Barone, V.; Petersson, G. A.; Nakatsuji, H.; Li, X.; Caricato, M.; Marenich, A.; Bloino, J.; Janesko, B. G.; Gomperts, R.; Mennucci, B.; Hratchian, D. J. Gaussian 09, Revision D.01. Gaussian, Inc.: Wallingford, CT 2016.
- (19) Weigend, F.; Ahlrichs, R. Balanced basis sets of split valence, triple zeta valence and quadruple zeta valence quality for H to Rn: Design and assessment of accuracy. *Phys. Chem. Chem. Phys.* **2005**, *7* (18), 3297–3305.
- (20) Nguyen, A. I.; Darago, L. E.; Balcells, D.; Tilley, T. D. Influence of a “dangling” Co(II) Ion Bound to a [MnCo<sub>3</sub>O<sub>4</sub>] Oxo Cubane. *J. Am. Chem. Soc.* **2018**, *140* (29), 9030–9033.
- (21) Computational Chemistry Comparison and Benchmark Data Base Release 19. Standard Reference Database 101. National Institute of Standards and Technology.
- (22) Goerigk, L.; Grimme, S. A thorough benchmark of density functional methods for general main group thermochemistry, kinetics, and noncovalent interactions. *Phys. Chem. Chem. Phys.* **2011**, *13* (14), 6670–6688.
- (23) Bauernschmitt, R.; Ahlrichs, R. Stability analysis for solutions of the closed shell Kohn-Sham equation. *J. Chem. Phys.* **1996**, *104* (22), 9047–9052.
- (24) Cossi, M.; Rega, N.; Scalmani, G.; Barone, V. Energies, structures, and electronic properties of molecules in solution with the C-PCM solvation model. *J. Comput. Chem.* **2003**, *24* (6), 669–681.
- (25) Chai, J. Da; Head-Gordon, M. Long-range corrected hybrid density functionals with damped atom-atom dispersion corrections. *Phys. Chem. Chem. Phys.* **2008**, *10* (44), 6615–6620.
- (26) Glendening, E. D.; Landis, C. R.; Weinhold, F. NBO 6.0: Natural bond orbital analysis program. *J. Comput. Chem.* **2013**, *34* (16), 1429–1437.
- (27) Chakrabarty, R.; Bora, S. J.; Das, B. K. Synthesis, structure, spectral and electrochemical properties, and catalytic use of cobalt(III)-oxo cubane clusters. *Inorg. Chem.* **2007**, *46* (22), 9450–9462.
- (28) Nguyen, A. I.; Suess, D. L. M.; Darago, L. E.; Oyala, P. H.; Levine, D. S.; Ziegler, M. S.; Britt, R. D.; Tilley, T.

D. Manganese-Cobalt Oxido Cubanes Relevant to Manganese-Doped Water Oxidation Catalysts. *J. Am. Chem. Soc.* **2017**, *139* (15), 5579–5587.

- (29) Reichardt, C. Solvatochromic Dyes as Solvent Polarity Indicators. *Chem. Rev.* **1994**, *94* (8), 2319–2358.
- (30) Reichardt, C. Empirical Parameters of Solvent Polarity as Linear Free-Energy Relationships. *Angew. Chemie Int. Ed. Engl.* **1979**, *18* (2), 98–110.
- (31) Kamlet, M. J.; Abboud, J. L. M.; Taft, R. W. An Examination of Linear Solvation Energy Relationships. *Prog. Phys. Org. Chem.* **1981**, *13*, 485–630.
